# Supplementary material for: Identification and Expression Analyses of Olfactory Gene Families in the Rice Grasshopper, Oxya chinensis, From Antennal Transcriptomes
Source: Front Physiol. 2019 Sep 26;10:1223. doi: 10.3389/fphys.2019.01223 (PMC6775195; doi:10.3389/fphys.2019.01223)
Supplement: TABLE S2 — A list of the identified OBPs, CSPs, ORs, IRs and SNMPs in O. chinensis, and detailed genetic characteristics, best matches in NCBI-nr database, protein domains and estimated expression levels found in each petal module. [file Table_2.XLSX]

## Sheet: Sheet 1-OBP
Gene Name	Unigene ID	Transcript 5'-3'	Transcript length	Predicted protein sequence	Predicted protein length	Status	GenBank accession	NR_annotation	E value	Identities(%)	Csyteine Motif	Predicted Domains^					MA_rawfragments	FA_rawfragments	MA_FPKM	FA_FPKM	log2Fold	pvalue	qvalue	Diff
												Signal Peptide	Pfam	Superfamily✚	Panther★	Smart✪
OchiOBP1	Unigene9728_All	GGCACGCAGACCCAGAGGCGACATTGCTCCCCGGGGCTCTACGCGACTACCGCACCACCACCACGCCAGCAGCCGCCACCATGGACAAGGGGACCTCCACAGCGCTCACCGCCTGCTTGCTGATCACTGTCGCCGCCCTACACACGCAGGCCCTGTCTCTGGAGCAGCTAAGACAGACGAGCAAGATAGTGAGGAACATGTGCCTGCAGAAGACGGGAGTCGATAAAGGTCTTGTGGAAGGAATCCAAGAAGGGAAGTTTCCCGATGACCAAAACCTAAAATGTTACATGAAGTGCTGCATGGGAGCTATGCAGGTGTTGCGCCAGGGTCGCTACAATGTGGATGCTGCGAAGAACCAGGCGGAGAAGATGTTGCCTCCTGACCTCAAGGACAGGTTCA…	739	MDKGTSTALTACLLITVAALHTQALSLEQLRQTSKIVRNMCLQKTGVDKGLVEGIQEGKFPDDQNLKCYMKCCMGAMQVLRQGRYNVDAAKNQAEKMLPPDLKDRFKAMLDACSDRAVGADDCEMAYQLTKCSYEADKEIFLFP	144	Complete ORF	AEX33165.1	OBP9 protein [Locusta migratoria]	1e-65	83.01	Classic	1-24	PF01395	SSF47565	PTHR21364	SM00708	17989	31846	1784.39	2520.65	0.599998	0	0	noDEG
OchiOBP2	CL6011.Contig2_All	TGGGCCAGTGCCATCAGAGTGGGAGCTAGCGACGCGGTGTGGGCATAAATACAGACGCCGAGGATGTGCGTGGCAGATTCTGCCGTGGGAACACGCACTGTGCGCAATGGCTGCCGCGGTTGTCGCTGCTATACTTCTGCTGGCGACCGTCGCCAAGGCGGAGGATCCTTTGATAGAGATGGTCATCAAGGAGATCAAAGGATGTATGGAGTCAGAACATCTTGGTAATGTCGGAGGTCTGAGGACAACCAACGATCCAAATAGCCCCGAACAAAAGTGTTTCCTCGGCTGTATGCTGAAGAAATTCAAAGCGCTTGATGCTGACGGCCACTACGACCCAGAAGGCCTGAAGACACTCATCCACAACTGCCCTAAGATTAAGCCCCATCCTGACTTACA…	1063	MAAAVVAAILLLATVAKAEDPLIEMVIKEIKGCMESEHLGNVGGLRTTNDPNSPEQKCFLGCMLKKFKALDADGHYDPEGLKTLIHNCPKIKPHPDLQSAGLVVADECTSKVTGCSDYCTCAPVVSKCLHDGMKNKAFETIFITLDEALDKMES	154	Complete ORF	AKC02197.1	odorant-binding protein 6 [Oedaleus decorus asiaticus]	2e-59	70.13	Plus-C OBPs type-A	1-18	PF01395	SSF47565	PTHR11857	SM00708	22221	42290	1390.87	2166.63	0.704394	0	0	noDEG
OchiOBP3	Unigene19638_All	CAGCGGTAGCTCCCGCAGCACACCACACAGCACCATGAAGCCCGGGTCAGCGCCTCTGGCGACCGCCACCGCGGCCCTCCTGCTGCTGCTGGCCGCCACCGTCCGGGGCCAAGATGATGAGATGAAAGAAATGATGGAGCAGCTTCACCAGACATGTATTGGTGAGAGTGGCGCAGCAGAAGGTAATATCGCTGAAGCTAGGAAAGGCAATTTCATTGATGATGGTAACTTGAAGTGCTACATGAAGTGCATATTCGTCCAAATGACATGTATGTCAGAGGATGGAGTCTTTGACATTGATACTGCAATTGCAATGTTGCCTGATAATCTAAAAGATATTGCATCAAAAGCACTTAATGCCTGCAAGGATGAAAAGGGCAGTGATGCTTGTGACACAGC…	1499	MKPGSAPLATATAALLLLLAATVRGQDDEMKEMMEQLHQTCIGESGAAEGNIAEARKGNFIDDGNLKCYMKCIFVQMTCMSEDGVFDIDTAIAMLPDNLKDIASKALNACKDEKGSDACDTAFKINQCLYKQAPKDYILV	140	Complete ORF	AKC02193.1	odorant-binding protein 2 [Oedaleus decorus asiaticus]	1e-64	86.43	Classic	1-25	PF01395	SSF47565	PTHR11857	SM00709	40760	50383	1704.84	1750.42	0.0817839	1.11382e-17	3.72422e-16	noDEG
OchiOBP4	Unigene18990_All	GAGGCGACCTACAAAGCCCGTCAGAGGGCGGCGTCTCTGTCGGTGCGGTATAAAGGGCGGCGAAGGCGGCTGCTCCAGCATTGTTCCTCAGCGCACCGGCACTGGGCCTCCTCACCAGCAACAATGCAGACACTGCTCACTTGCTGCGCCGCCGGCTGGCTGCTAATTGCAGCCGCTTTGCTACAGCCGACAAAAGGTGACGAGATGTTGCACAATACGGACATCCCATCCACGATGGCGGAGTGTAACGCTACTTTCAAATTAGGATGGAGATGCTGGGACAATCTTCTCAGTGAGGGTCACATGATTGACGAGAGTAAATACCAGCAGAAGTGTTGGTTCTACTGCTTGCTGGATAGAACTGGAGCGATGCATGCAGACGGCGCTTTCGACAAAGAC…	844	MQTLLTCCAAGWLLIAAALLQPTKGDEMLHNTDIPSTMAECNATFKLGWRCWDNLLSEGHMIDESKYQQKCWFYCLLDRTGAMHADGAFDKDLLKMVLQGFPNGPSLAHLDETTYTCVAQRNEVDLCERAYDVVKCIMTEELARMHHSS	149	Complete ORF	AKC02200.1	odorant-binding protein 9 [Oedaleus decorus asiaticus]	3e-76	88.59	Classic	1-25	PF01395	SSF47565	PTHR11857	SM00710	23700	25888	1976.38	1741.51	-0.096603	7.85501e-14	2.0521e-12	noDEG
OchiOBP5	CL1204.Contig29_All	CCGCCGGCTCCACTGACGCACACGTAGACCAGCCGACATGTGTGCCCGACTCTCCTCCTGCGCGGCCCTGCTGCTGCTCGTGGCCGCTGCCGCGCACGCCTGGGACGTCAACATGAAACTGACTGGCCGCATTATGGACGCAGCGAAGGAAGTGGACACAAAGTGCCGCGCTTCTACTGGGGTACCAAGAGAAATGCTCCATAGATATGCTGATGGTGAAGCACTAAATGATGAGGATTTCAAGTGTTACATGAAATGCATTATGGTTGAGTTTAATTCACTCTCAGAAGATGGGGTTTTTGTTTTGGAAGAAGAATTAGAAAACATTCCTCCAGAAATAAAAGAAGAAGGCCACAGGGTTGTGCACAGTTGCAAACACATAAGTCATGATGAAGCTTG…	742	MCARLSSCAALLLLVAAAAHAWDVNMKLTGRIMDAAKEVDTKCRASTGVPREMLHRYADGEALNDEDFKCYMKCIMVEFNSLSEDGVFVLEEELENIPPEIKEEGHRVVHSCKHISHDEACEAAWQIHQCYRQSDPDLYSLVVRAFDATIDA	152	Complete ORF	AKC02192.1	odorant-binding protein 1 [Oedaleus decorus asiaticus]	8e-72	85.33	Classic	1-21	PF01395	SSF47565	PTHR11857	SM00711	19243	21400	1898.47	1685.36	-0.0707221	7.37857e-07	9.17918e-06	noDEG
OchiOBP6	Unigene24021_All	CGGCGACAGGCGCGGCGCGAGGCTGCGTTACGTGACGGCGGCGCCGCCCCCGCCGCGACGCTATAAGAGCGGCCCCAGCCGGCGGCGCCGCAGACCCGCCAGCCACACCGCGCCATGAGGACCTCTGCCGCAGCCGCCGGGGCCACGTTGCTCCTACTCGCCGCCGTCGTATCGGCGATGGATATGACACCAGAATTCATGGAGATCGTTAACAAATGCAAGGCAGAACATGAACCAAATGAAGACGAGCTGGCAGGAATGATGATGTTAAAGGTCCCAGAAAGTGCCAACGGCAAGTGTTTCATGGGGTGCGTTCTACAGGCAGTTGGAGTGGTTAAGGAAGGCAAGTTCGACAAGGAGGAGGCGAAGAAACATGCCACGTCCAAGATGGCCGACAAA…	712	MRTSAAAAGATLLLLAAVVSAMDMTPEFMEIVNKCKAEHEPNEDELAGMMMLKVPESANGKCFMGCVLQAVGVVKEGKFDKEEAKKHATSKMADKEELEKHMQLIDKCSSEVADESDSCGIGPKLMECIKQFAPEFDIALPTASSE	146	Complete ORF	AKC02195.1	odorant-binding protein 4 [Oedaleus decorus asiaticus]	8e-63	81.76	Classic	1-21	PF01395	SSF47565	PTHR11857	SM00712	5701	9103	594.47	754.79	0.451128	6.11591e-79	8.87052e-77	noDEG
OchiOBP7	Unigene12234_All	ACCCGCGCCGTGGCTGCTGGAACGTTCTGATCGCTGGCGCGCCGCCCTGTCCTGTAGGAGACCGCCATGAGGGTTCTGCTGCTGGCCTGCGTCGCTTCACTGGGCCTCCTGGTGGCGGCCGAGACCTCAGATTCAATGTCTCGAGCTGAAGAAGCAGGTTCCAAGATTAACCTTCCTGAGCTGATTGAGGAATGCAACGAGACATTCCCCATATCCAAGGCTTCCTTGAACTACTTTTTCTCCCACGGTAGACTGCAAAACGAGCATGACTACGGGTCTAAGTGCTACATACACTGTCTGACGGATAGGTCTGGAGAGATTGATTCGGAAGGTGATTTCGATGTGGACATGATCAAAGTCATGACTCGCCGTTTCCCTAACGAGACTCACATCGAGGGT…	758	MRVLLLACVASLGLLVAAETSDSMSRAEEAGSKINLPELIEECNETFPISKASLNYFFSHGRLQNEHDYGSKCYIHCLTDRSGEIDSEGDFDVDMIKVMTRRFPNETHIEGLSEMVDNCVAARDETDFCERGYGLVSCLIKEKLARLGSSH	151	Complete ORF	AKC02201.1	odorant-binding protein 10 [Oedaleus decorus asiaticus]	1e-62	77.78	Classic	1-18	PF01395	SSF47565	PTHR11857	SM00713	6218	8226	596.34	630.94	0.179741	8.15798e-14	2.12485e-12	noDEG
OchiOBP8	CL5239.Contig1_All	ATTCAAATAAAGGGTGCGCCAACAGCGGATTTCCTCTTGTCTGGGGACGACGAAGGCTTAACGCTAGGACGCTACGATGACGCTTGCTGCCCGATACTTTTCAGTGAGTGTGTTACTGGCGGTAGTCCTGTTGGGTGACGTCTGTGCAGCAGAGGAGATATTCACCATACGCCAACTAAAGGCCATTGTGAACGAGTGCAACGACACTTACTACTTATCTCAGAAAAGCTGGGACAGCGTGTACACGACCGGCTCTCTTCAAGACGAGGACGATCTGGTGGCCAAGTGCTTCTTTGAATGCGTGCTGCAGAAGACAGGCGCGATGGACGTGGAGGGGACCATCAACAGTGACGTCACTAAACTTGTGTTCCTCGCCAGCCACGAAGGTACAGCCGTGGA…	2547	MTLAARYFSVSVLLAVVLLGDVCAAEEIFTIRQLKAIVNECNDTYYLSQKSWDSVYTTGSLQDEDDLVAKCFFECVLQKTGAMDVEGTINSDVTKLVFLASHEGTAVDGYEELIDMCVPGRVEEDTCEKAYALVKCVTVEELSRRQAHQ	149	Complete ORF	AKC02202.1	odorant-binding protein 11 [Oedaleus decorus asiaticus]	1e-56	73.51	Classic	1-24	PF01395	SSF47565	PTHR11857	SM00714	16515	16412	384.29	321.47	-0.233025	7.19503e-49	6.98047e-47	noDEG
OchiOBP9	Unigene4080_All	CAGCCATGAACTGGGGTCTGTGGTTAACTGCTTCTATAGCTATTGTATTGCAGCTGTCAATAAGTGAAGGCCTAAAATGTCATACTGATGAAGACTCGCAAAACCCAGATGAATTTCAAGAGGTTGCTGCAATGTGTATGAAAAATACATCAGGATCTGAGCTTAACAGAAGTGACAGAGAAAATAAAAGGAATGGAAACAATTATCACAAAACTAATTTTGGAAATACCAATGACAACTGGAGAAATGGTGGAATGGAGCAGACCTTTCCTGGATACAACAATGAAAATGAAGGATACGGTTCGCGTGACAATGATAGATGCAATGCAAATGGTGATGGATTCAACAGAAACAGCATGAATCAAAATAGCATGAATGGCATGAGGCAGAGGCCACGAA…	1210	MNWGLWLTASIAIVLQLSISEGLKCHTDEDSQNPDEFQEVAAMCMKNTSGSELNRSDRENKRNGNNYHKTNFGNTNDNWRNGGMEQTFPGYNNENEGYGSRDNDRCNANGDGFNRNSMNQNSMNGMRQRPRNRNRRSSPQSEAADVDLEDIEPCAVHCIFRQMGMLGDDALPDRSAVAKVMLRGVKDTEVKDFVQEAVEDCFDQVESDRKGSKCEFSKNVALCLRQKGRENCEDWGEPDDDQQSKQNKNGNNNANNSNQYGNKKWN	266	Complete ORF	AMO66405.1	chemosensory protein OBP16 [Locusta migratoria manilensis]	0	87.82	Atypical	1-22	PF01395	SSF47565	PTHR11857	SM00715	2239	2681	120.05	118.41	0.0359173	0.38249	0.57786	noDEG
OchiOBP10	CL3890.Contig3_All	AACATGGCAGGGAATGCCGGAAACCAGCGACCGTGTGCGGCGGAGTGAGAGAAGCAGAACAGCGCCATGAGGGAGCAGCTGGTCGCTTGCGTGGCCGCGGCGTGCGTGCTGGGGGCGGTCGCTCTGTCCTGTCCAATGTCCAGAGCAGAACAAGCAGCTGCGAAAGTGAACATTCCTGAGGTTATAGCCACGTGCAACAGAACTCTGCCCGTTGCACAGGATATTTGGAACTACTTCGTACTATATGGGAAACTGGAAGACGAGAATGATTACAGAACAAAGTGCTATATTCACTGCCTAATGAATACATCTGGGGAGATAGACTCGCGCGGTCAGTTCGATGTCGAGCTGATCAAGATCCTGACTCGTCACTTCCCCAACGAGACGAACATGGAGGGA…	1181	MREQLVACVAAACVLGAVALSCPMSRAEQAAAKVNIPEVIATCNRTLPVAQDIWNYFVLYGKLEDENDYRTKCYIHCLMNTSGEIDSRGQFDVELIKILTRHFPNETNMEGLNEIVDDCVAARDETDLCGRAYGLVSCTIREKLVRLEGANENKIHC	157	Complete ORF	AKC02201.1	odorant-binding protein 10 [Oedaleus decorus asiaticus]	1e-43	61.07	Classic	1-19	PF01395	SSF47565	PTHR11857	SM00716	930	1866	51.33	84.72	0.780647	4.93804e-44	4.30881e-42	noDEG
OchiOBP11	Unigene7362_All	GGGGTATAAGTGGCGCTGAGGCACAGCAGCGCGGCACCATAGCCTCCCATAGCGAGACACCATGAGGTCGTTCCCACTCGTCGCCGTCGGCGCGCTGCTACTGGCAGTCGCTGTGCAGGGAGACGGACCAAACCTGACCAAAGCAATCGACGAAATAAAGGCGTGCATGGCCTCTGAGAACCTAGATAGTCTGGCTGGGTTGAGAACCAACAAGGAGGCCAAGACGACACAGGAGAAGTGTTTTATCGGCTGCATGATGATGAACTTACACGTGCTCAACTCTGACGGCCAGTACGACGCCGCACTTCTGAAAGAGCACATCAACCACTGCCCTGAGATGGCGAAGAACCCGCAGAAGAAGGCGATTGCACTGGAGGTTGCCGACAGCTGCACTGGAAA…	552	MRSFPLVAVGALLLAVAVQGDGPNLTKAIDEIKACMASENLDSLAGLRTNKEAKTTQEKCFIGCMMMNLHVLNSDGQYDAALLKEHINHCPEMAKNPQKKAIALEVADSCTGKVTGCSGHCECGTVAGNCLAQGMEANGQETLYTWLGKIIDKMDA	156	Complete ORF	AKC02198.1	odorant-binding protein 7 [Oedaleus decorus asiaticus]	1e-48	60.26	Plus-C OBPs type-A	1-20	PF01395	SSF47565	PTHR11857	SM00717	333	573	49.86	66.16	0.559014	9.52827e-09	1.53383e-07	noDEG
OchiOBP12	CL3311.Contig3_All	TCACAGCCCTGGCACACTTACATAAATCTTTGCTGGGAACATGAAATGCCGCCAGTTCTGAACTATAAACACAGGCAACAGGCACGATATTCAGTGAGCTTCATATTTAAAATACCAGTGATGAGAACGCTACAGATTTATACAGTTGTCTGCGCTATCATTGTAAAATGCTGCTGTGGATCCGAAGAGGTACCACAAGACACGGCTATGGTGATGAAATGTGCAGAAGAATTAGGCATGGATCAAGATACGGCTAGCAGATTAATGAGGATCAGTAATCTTAAACCTCCCAGTGAAACAACTGAAGACCAAAGATGTTTATTGCAGTGCGTCGCAGAAAAATTGAAATACATTACATCGGAAGGTGTACTGGACGTCAATCATATTATGGAGTTAGTA…	1725	MPPVLNYKHRQQARYSVSFIFKIPVMRTLQIYTVVCAIIVKCCCGSEEVPQDTAMVMKCAEELGMDQDTASRLMRISNLKPPSETTEDQRCLLQCVAEKLKYITSEGVLDVNHIMELVDEEMKKHGSSKTIYREKVEECAKRTGTGACMTSYLNFMCLDEIRQ	163	Complete ORF	AKC02206.1	odorant-binding protein 15 [Oedaleus decorus asiaticus]	2e-27	45.93	Classic	NO	PF01395	SSF47565	PTHR11857	SM00718	1902	2189	67.86	65.19	-0.0212446	0.637356	0.789788	noDEG
OchiOBP13	Unigene12172_All	CACTCTGCAGGCTACAGCCGCACACCATGGACGCCCGCCGCCACTCCGTCGCCGTGGGGATGGTTATCGTTGCTGTCCTCAGCGCGGTGGTCGCGGAATCTCCACAGCACATGGCGACAGGGTTTCGGTATCCCAACGAAATAGTGAATAAATGCCAAGAGAAGTGGGAGCTATCTGAAGAGATCATCGAGGAAATTCGTAAGAATCACGGAGCATTACCTGATGAGGGTTCAGTACAGCAAAGGTGTTTCGAAGAATGTTTGGTTAAAGAGGTGGGCATGTTCAAGGAAGGTGGTGGGGTTGCGGTGCAGAAGATTATAAATATCATCCAAAAGGCGCTTGAGCTTGCTTCGGAAAAGTCTGGCGAGAAGTTGCGATTCGATGCGGATGCAGCTACGC…	657	MDARRHSVAVGMVIVAVLSAVVAESPQHMATGFRYPNEIVNKCQEKWELSEEIIEEIRKNHGALPDEGSVQQRCFEECLVKEVGMFKEGGGVAVQKIINIIQKALELASEKSGEKLRFDADAATRDIEGCKFEGEDDKCINSHEAMKCLRRLGTEENMKLYITKES	166	Complete ORF	AKC02204.1	odorant-binding protein 13 [Oedaleus decorus asiaticus]	1e-45	52.9	Classic	1-23	PF01395	SSF47565	PTHR11857	SM00719	307	473	35.74	43.43	0.399603	0.000127289	0.00103026	noDEG
OchiOBP14	CL7346.Contig1_All	CTTGTGAAATGTGTTACAGTGGAGCCAACCATCACATCGGAAGAAATGAGGACGGACATCATGGTGATACAACAGTGCAACGAAACACACCCGGTTCCACTTATGGACATGAATAGGGCGTTGATCAATAGAAAGATAGACCCAGAAAACACTGCCTTCAAGTGTTTTGTATACTGCCTACTCAACAAGTACGAATGGATGGATGATGAAGGTGGCTTCCTCATTGCAAACATGAAGCACAATTTATCAGATTCCCACCTAGACCAACTAAGCATCGATTTTCTCGTTTATAAATGTTCAGCGACAGGCTCGTCGGAGAAATGTGAGCGGGCTTATCGATTTACAGAATGCTTCTGGGGAGAGGTGAGCAAGTTCCCCGACAATTCTGACGAGAAGTAC…	699	MRTDIMVIQQCNETHPVPLMDMNRALINRKIDPENTAFKCFVYCLLNKYEWMDDEGGFLIANMKHNLSDSHLDQLSIDFLVYKCSATGSSEKCERAYRFTECFWGEVSKFPDNSDEKYDDPNLFALYQ	128	Complete ORF	AEX33164.1	OBP8 protein [Locusta migratoria]	3e-69	83.8	Classic	NO	PF01395	SSF47565	PTHR11857	SM00720	73	52	7.79	4.37	-0.713384	0.0059508	0.0279144	noDEG
OchiOBP15	Unigene12217_All	GTCAGCGTCGCCATGAAGGCCTGCTTCTGTTTGCTGTTTGCGGCTGTCGCTCTTTTCGCTGTCGCTAAGGCTGCGCCAGAGAAGATGAAACAAATTGTTGAAAAATGCAAGGCATCAGAAAACTTAGGAAGTTTGGATGGGCTCAAGACCAACAAGGCTCCTACTACCAAAGAAGAGAAGTGCTTTATTGGATGTTTGATGATGGATATGAAATTTCTGGCTTCAGACGGACAGTATGATACTGCAGCTGCAAAAGAAACAGTCAACAACTGCGAACACCTGAAGGAAAAGCCTGACGAGAAGAAGGCTGCCTTGGAAGTGGTGGACGACTGTGGACACAAAGTTACTGGCTGCAATGGTTACTGCGAGTGTGGCGTCATGACGGCTGGCTGCTTGGCC…	731	MKACFCLLFAAVALFAVAKAAPEKMKQIVEKCKASENLGSLDGLKTNKAPTTKEEKCFIGCLMMDMKFLASDGQYDTAAAKETVNNCEHLKEKPDEKKAALEVVDDCGHKVTGCNGYCECGVMTAGCLARGMEAKGFEGSFARIDKALEKL	151	Complete ORF	AKC02196.1	odorant-binding protein 5 [Oedaleus decorus asiaticus]	4e-55	68.21	Plus-C OBPs type-A	1-20	PF01395	SSF47565	PTHR11857	SM00721	33	51	3.32	4.09	0.404032	0.203682	0.390845	noDEG
OchiOBP16	CL3678.Contig2_All	CAGACTCAGAGCATTCAAAATGGTCTATTTCTACGTGTTTACTTTTGGTTGCTTGTTGTGGCTGCTCTTTCAACATTCTGTGAACTGCAGTGAAATGGGTATTTGGCGAAAGTGCAATGAAACATACCCTGTTTCTGATGAAACACTCATTTCATTCAGGAATAATGGTACGATACTAGACAAAAATGATAGGACGGAGCGGTGTTTCACTGACTGTTATGGAAAGAAGAGCTTCATGCTAACATCAGATGGAAGCCTCAACTGGACCACTCTAGATCACATACTCTCAAACTTCAAGACAAAGCATGGCGCACAGGGCATATTTGGAAAGTGCAGACAGAACACCAGCAATGATGAATGTATGCAAACCTATCTTTCAATGCAGTGTGTGGCTGAAAC…	633	MVYFYVFTFGCLLWLLFQHSVNCSEMGIWRKCNETYPVSDETLISFRNNGTILDKNDRTERCFTDCYGKKSFMLTSDGSLNWTTLDHILSNFKTKHGAQGIFGKCRQNTSNDECMQTYLSMQCVAETILSLINAR	135	Complete ORF	AKC02203.1	odorant-binding protein 12 [Oedaleus decorus asiaticus]	1e-44	63.04	Classic	1-23	PF01395	SSF47565	PTHR11857	SM00722	47	33	5.73	3.18	-0.734194	0.0236253	0.0823567	noDEG
OchiOBP17	Unigene15175_All	CTATGCACTAAGTAATATTTCCAAGTGAAATATGGAGAAATACAGGTTTCAGTTCTGTCTAACCAAAGCTTTGTTTTTGTTTGGTGTAGGAGTCTCTGCAATACTATCATGGAGTGCAGAAACTGAGGCTGCAAGGGAGAATGTGTGGACCACAAGTGATCAGCTTAGGAAAAAACTCTCAGATGCCTTAGAAGAATGTGTAATCACTGAAAATGAGGATTTAAACAGTTTATGGTCTCCCATAAAAGGCAACCCACCTTATGGAGGCAACACATGGAACATAGGAGTGGCTGCTGCAAACAGCAACAAAGCCATAAATAACTGGAGGAGCTACAATAAAGAGACAAGAAACAGAACCACAAGTGTAAACAGAAGCCAAAAATTTGACATCAACAGCGG…	898	MEKYRFQFCLTKALFLFGVGVSAILSWSAETEAARENVWTTSDQLRKKLSDALEECVITENEDLNSLWSPIKGNPPYGGNTWNIGVAAANSNKAINNWRSYNKETRNRTTSVNRSQKFDINSGSWRNDSDSQDKKKWKEHKFPYRYERCLNRRGNRQRQERCKRSSKSTGGNALSSCVDRCLFVKLQVVDENGLPVEALFVQLLETAISEQQVRRKARNELHYCFQKMASVAEEDTCIFGRQFATCLDLNVQDIKLHQST	260	Complete ORF	ATO59040.1	odorant binding protein 13 [Schistocerca gregaria]	3e-160	70.41	Atypical	NO	PF01395	SSF47565	PTHR11857	SM00723	25	39	1.93	2.44	0.417547	0.251768	0.44466	noDEG
OchiOBP18	Unigene14096_All	ACTTCGCCTTGGTGCTCTGCGTCGCCTCAGCAGCCGCCGTGCTGCAGGCTCCCTGGTGCCCCACGACGGCGTCCCGAGGAGTGCAAGAAGACATGGGGCAGTGCGCGGAGGAACTTAAGGACGCCATCCTCAGGGAATACGCCAAGTCTGTAGCAACCAGGCGCACAAGGAGTGCAGAAATGTCAGAGGAAGACCGTTTGCTGGTTGGGTGCATGGTGAGCTGCCTCTTCCACAAGGGACCCCACGGCCGCCTGCAGACGGGCAGCAGGCTGGCGACGGCTGAGCTGGGGGCGATGCGGCTGTTCGCAGACGGCGCCAGCGACGCCCGCTACCGCAACGCCACGGCCGACGCTGTGCGCCGCTGCTCCGCCGCCAGCAGGTCTCTGCTGCCCGACAACG…	665	FALVLCVASAAAVLQAPWCPTTASRGVQEDMGQCAEELKDAILREYAKSVATRRTRSAEMSEEDRLLVGCMVSCLFHKGPHGRLQTGSRLATAELGAMRLFADGASDARYRNATADAVRRCSAASRSLLPDNGGTRHDCELGFFMFECVSDQITEYCQWQPE	162	5' lost	ATO59036.1	odorant binding protein 9 [Schistocerca gregaria]	4e-142	88.27	Plus-C OBPs type-B	NA	PF01395	SSF47565	PTHR11857	SM00723	678	758	667.504	769.92	-0.0630867	0.406706	0.604795	noDEG
^ Protein domains predicted using InterPro protein sequence analysis & classification database as implemated in Geneious
Pfam − PF01395 (pheromone/general odorant binding protein, PBP/GOBP)
✚ Superfamily − SSF47565 (insect pheromone/odorant-binding proteins)
★ PANTHER − PTHR11857 (Odorant-Binding Protein Related)
 Smart − SM00708 (insect pheromone/odorant binding protein domain)

## Sheet: Sheet 2-CSP
Gene Name	Unigene ID	Transcript 5'-3'	Transcript length	Predicted protein sequence	Predicted protein length	Status	GenBank accession	NR_annotation	E value	Identities(%)	Predicted Domains^				MA_rawfragments	FA_rawfragments	MA_FPKM	FA_FPKM	log2Fold	pvalue	qvalue	Diff
											Signal Peptide	Pfam	Superfamily✚	Panther★
OchiCSP1	Unigene12782_All	CAGTGTGATGCGGGCGAGTGTCACTTTGTGCGCAACCCTTGCTGAGTCACGAGTGCACACTCACGCCGGCACATATAAGAGGAGTGCAGAGCTCGCAAATGGAGTTGTGATCGCACGCTGCAACTGGACACTTCAGCCATGGCCGCAAACCTGACCCTCTGCTGTCTGCTGGGGCTTGTGGCGCTGTGCGCAGGCGCTGCAGCACAGGACCCTATAGACAGCTTCAATGTGGACGAGGTGCTCAGCAACGAACGTCTCCTCAAGTCCTACATTCAGTGTATGCTGGACGCGAACGAGGGCAGGTGCACCAAGGAGGGAAAGGAGATCAAAAAGAGGCTCCCCAAGTTCGTGGAGAACGGGTGCCTGGACTGCTCGCCTGGTGCGCTAGAGAGGGCCATC…	832	MAANLTLCCLLGLVALCAGAAAQDPIDSFNVDEVLSNERLLKSYIQCMLDANEGRCTKEGKEIKKRLPKFVENGCLDCSPGALERAIKTLKHVTEQHPADWAKLKAKYDPTGEFAKKHAETWKQRGVNF	129	Complete ORF	AAT39531.1	antennal CSPSgre-III-1 [Schistocerca gregaria]	1e-55	79.07	NO	PF03392	SSF100910	PTHR11257	113921	187172	9676.23	12811	0.492332	0	0	noDEG
OchiCSP2	Unigene17218_All	TCTCTCTGTCTTCCTCTCTCTCGCTACCTCAGAGTGGAAGTAAGCCTGTGTGCGTGTGTCGGCGGTGTATAAAGAGCCGCCGGCGCTCGCAGCCAGCGCACTCGCTCGTCCAGCACCGGTCAACCATGCAGGCTCTCACCCTCGCTCTCGTGGCTCTGGTAGCCGTCGTGGCTACGGCGACGGCGTACACCACCAAGTACGACAACATCGACCTGGACGAGATTCTGAACAACGAGCGGCTGCTCAAGAAGTACCACGAGTGTCTCATGTCCGACACCGACAGCAGCTGCACACCGGACGGCAAGGAACTCAAAGCGACCATCCCGGACGCCCTGGTCACTGACTGCGGCAAGTGCAACGAGAAGCAGAAGGACGGCGCCAACAAGGTGATCAGGTTCC…	580	MQALTLALVALVAVVATATAYTTKYDNIDLDEILNNERLLKKYHECLMSDTDSSCTPDGKELKATIPDALVTDCGKCNEKQKDGANKVIRFLVQKKEDLWKPLQAKYDPEGVYLTKHPELLKSE	124	Complete ORF	CAB65178.1	chemosensory protein [Locusta migratoria]	2e-54	84.55	1-20	PF03392	SSF100910	PTHR11257	29111	44372	4049.55	4794.19	0.384086	1.14656e-280	4.60398e-278	noDEG
OchiCSP3	CL220.Contig100_All	GAGGTTGCCGCCCTGGCGCGCTCTCGCTCCTGGGAACGCCGCGGATTGGCGCGGCGGCCGCGGCCGGCAGTGGGGGTTAGCGGCGCCTATAAGAGTGCCGGCGGGCGAGCGGCGCGCATTCCTCGCCATGGCCCGCTCCCAGCTCGTCCTCCTGCTGGCCGCCCTCGTGGCTGTGGCCGCCGCCGAGAACCCTCTGCTCTCGCAGCTGGAGAACATCGACGTCGACGCCGTGCTCGCCGATCCGGAGAGGGTCGACGCGGCCGTCAAGTGCTTCGTCAGCGACACCGAGGAGCACTGCAACGTCCGGTCCAAAGTCATCAAGAGCCTGATTGCTGAGATGCTGAAGACGAACTGCGCGGAGTGCTCTGACAGCCAGAAGGCGGGCGTGGTCAAGTTCAT…	955	MARSQLVLLLAALVAVAAAENPLLSQLENIDVDAVLADPERVDAAVKCFVSDTEEHCNVRSKVIKSLIAEMLKTNCAECSDSQKAGVVKFMSHIAKNKPEDMKKLLAKYDPKGEALAKYGDSWREKGISV	130	Complete ORF	CAJ01462.1	hypothetical protein [Locusta migratoria]	3e-54	84.5	1-19	PF03392	SSF100910	PTHR11257	34484	61423	2461.2	3566.14	0.608853	0	0	noDEG
OchiCSP4	CL999.Contig21_All	CGCAACCACACGAGTGAAGTTTCCAGTCCGAAACATAAATGTTGACTCACCTGGACGACCTGTTGCAGCGTCATGCCTAGGTAGGCCCTACACGTGGGAGCGGCGCTATAAGAGCGGCCGTCCAGAGACCGGCCGCACAGCCTTACGGGAAGCCTATCTAGCACCAGCAGCCATGGCGAGCCCCCTGATCCTGTCCTGCTGTCTGCTGGTGGCGGTGGTCGCCTCAGGTCGAGCCGCGCCCGAGGACAAGCTGGACAGCGTGGACGTGGACGCCGTCCTCAACAACGACCGCCTCCTCCGGTCCCACATCAGCTGCGTGCTCGGCGCGGACGACGGGAAGTGCACTCCGGAGGGCAAGGAGGTCAAAAGCCGGCTGCCACACCTGGTGACGACGGGCTG…	1729	MASPLILSCCLLVAVVASGRAAPEDKLDSVDVDAVLNNDRLLRSHISCVLGADDGKCTPEGKEVKSRLPHLVTTGCADCTPRQLERAVKILKVVTVKHPEEWTKLKAKYDPTGEYAKQHAETWKKHGINF	130	Complete ORF	AAT39531.1	antennal CSPSgre-III-1 [Schistocerca gregaria]	1e-43	66.92	1-21	PF03392	SSF100910	PTHR11257	46150	63553	1642.76	1887.47	0.23763	6.3651e-163	1.67294e-160	noDEG
OchiCSP5	Unigene19539_All	GCGAGCACTCCGCCAGACGCCACCATGAGCCGCCCAGCCGCCGTACTTACGCTTGTAGCGCTGCTGGCCGCCCTCGCGGCAGCCCAGGACAAGTACCCAGATACTTTCGACAAGCTCGACGTGAAGGAGCTGCTGAGCGACAAGTCCCGCATTGAGGCTGCCATCCAGTGTCTGAAGGAGGCGGGCGAGGAAGCGTGCAGACCAGCCGGGAAGTTCCTCAAGTCGGTGCTGGCAGAGATCGTGGCAACGGACTGCGGCAAGTGCACCGAGTCGCAGAGGGAGAAGGTGTCCAGCTTCTTCGCGCACGTGTCGCAGCACTACCCGGAGGAGATGCAGAAGCTGCTGGACAAGTACGATCCCACCAAGGAGTTCAGGACCAAGTACCAGCAGTCGTGGGCC…	632	MSRPAAVLTLVALLAALAAAQDKYPDTFDKLDVKELLSDKSRIEAAIQCLKEAGEEACRPAGKFLKSVLAEIVATDCGKCTESQREKVSSFFAHVSQHYPEEMQKLLDKYDPTKEFRTKYQQSWAADGIKV	131	Complete ORF	CAJ01469.1	hypothetical protein [Locusta migratoria]	6e-44	68.55	1-20	PF03392	SSF100910	PTHR11257	5841	9935	718.04	958.94	0.542306	1.30044e-119	2.79189e-117	noDEG
OchiCSP6	CL4668.Contig3_All	TGGCAGACATGAAGACCTCCCTGGTGCTAGTTGCCGCTCTCGCCGTCATCGCGCTGGCTGCAGCCGATGACATGTACACGACCAAGTACGACAACATCAACTTGGACGAGATCATGAACAACGAGCGCCTGATGCAGCAGTACGAAATTTGCCTTACGGAGACCAAGGACGACAACTGCACACCAGAGGGCAAGGAGCTGAAGAAGGATATCCCCGACGCACTGGAAACTGAGTGTGCAAAATGCAACGAGAAACAGAAGGAAGGCATTAAGAAAGTTATCAAGTTCTTGATCAACCACAAACCGGAAACATGGAAGAAAATGAAGGAGCACTTTGACAAGGATGGAAAGTACACCGAGAAATACAAGAAGCTTGAGGATGAACTTAAGGAATGAATAT…	446	MKTSLVLVAALAVIALAAADDMYTTKYDNINLDEIMNNERLMQQYEICLTETKDDNCTPEGKELKKDIPDALETECAKCNEKQKEGIKKVIKFLINHKPETWKKMKEHFDKDGKYTEKYKKLEDELKE	128	Complete ORF	CAJ01478.1	hypothetical protein [Locusta migratoria]	4e-42	59.84	1-19	PF03392	SSF100910	PTHR11257	2211	3941	465.36	614.99	0.609863	1.44404e-59	1.69712e-57	noDEG
OchiCSP7	Unigene8295_All	CGCGGAGCGAACCGCGCGCCGCGGCGGCTGAGCCACAGTCTTCCAGCTCCCTGCCAGCATGCTGCTCCGCCGACAAGGTGCCGCAGCCGGCCTCCTCGCCGTCGCTGCCTGTTTGGTGACTGTGACATTGGCGGCACCTCAGAGATGTCCTTCCATAGAAGCAAATGATAAGAAGTACACCACACGCTATGACAACATTGATATAGACAGCATCCTGAAGAGTGACCGCCTGCTCAGGAGCTACATGGACTGCCTGATGGATCGTGGACCCTGTACTCAAGAGGGCTGCCTCCTCCGAGCTGCAATTCCAGATGCCCTGCAAACAGAGTGCTCTAAATGTAGTGCTGTTCAGAAGAAACAAGCAGGTCGTGTCATGGCTTGGATACTTGAGAACAAACG…	2194	MLLRRQGAAAGLLAVAACLVTVTLAAPQRCPSIEANDKKYTTRYDNIDIDSILKSDRLLRSYMDCLMDRGPCTQEGCLLRAAIPDALQTECSKCSAVQKKQAGRVMAWILENKRNYWDELIEKYDPQGNFRKKYGYDEDDDEEEK	145	Complete ORF	CAJ01476.1	hypothetical protein [Locusta migratoria]	2e-59	86.61	1-25	PF03392	SSF100910	PTHR11257	13334	18254	364.79	419.13	0.229104	6.53064e-45	5.79171e-43	noDEG
OchiCSP8	CL4668.Contig1_All	GCCACCGCAGACATGAAAGCATCCCTTCTAGTCGTGGCGGCTCTCGCCGTCATCGCTTTGGCTGCGGCCGACGAGATGTACACCACAAAGTACGACAACATCAACCTGGACGAGATCCTCAACAACGACCGCTTGATGCAACAGTACGAAGTCTGCCTCACCAAGGACAATGACAGCATATGCCCCCCGGAAGGCAAGGAGCTAAAGAAACACATCGCAGATGCGCTTGCAACTGAATGTTCCAAATGCAGCGACAGGCAGAAAGAAGGCGTTAAGAAAGTCATCAAGTTCTTGATTAACAAAAAACCGGATATGTGGAGTAGATTGAAGGAGCATTATGACGTCGATGGAAAACTCAGCGAAAAATATAAGAAGCTTGAGGATGAGCTCAAGGAATAA…	488	MKASLLVVAALAVIALAAADEMYTTKYDNINLDEILNNDRLMQQYEVCLTKDNDSICPPEGKELKKHIADALATECSKCSDRQKEGVKKVIKFLINKKPDMWSRLKEHYDVDGKLSEKYKKLEDELKE	128	Complete ORF	CAJ01478.1	hypothetical protein [Locusta migratoria]	1e-40	60.63	1-19	PF03392	SSF100910	PTHR11257	424	732	76.88	100.26	0.56378	6.30211e-11	1.28372e-09	noDEG
OchiCSP9	CL5760.Contig2_All	TCGCAGAGCCAGACATGAAGGCCGCCCTGCTACTCGTTTCGGCGCTCGCCGCCATCGCGCTGGCCGCCGCCGAGGAGAAGTACACCAGCAAGTACGACAACGTCAACATCGACGAGATCCTGAGCAACGAGCGCCTCTTCAGCAAGTACGTCCAGTGCCTGCTGGAGGACGCAGACTCCAACTGCACCGCCGACGGCAAGGAGCTCAAGAGAGTCATTCCTGACGCTCTGAACAACGAGTGTTCCAAGTGCAACGACAGGCAGAAGGAGGGCGCCAAGAAAGTCCTGAAACATCTCATCACTCACAAGCAGGACACGTGGCAGAAGCTGAAGACCAAGTACGATCCCGAAGGGAAGTACTCCAAGAAATACGAGGAGAGGGAGAAGGAAATTCTAGCGT…	467	MKAALLLVSALAAIALAAAEEKYTSKYDNVNIDEILSNERLFSKYVQCLLEDADSNCTADGKELKRVIPDALNNECSKCNDRQKEGAKKVLKHLITHKQDTWQKLKTKYDPEGKYSKKYEEREKEILA	128	Complete ORF	CAJ01478.1	hypothetical protein [Locusta migratoria]	7e-54	77.78	1-19	PF03392	SSF100910	PTHR11257	867	260	168.9	37.93	-1.96152	7.41328e-98	1.33399e-95	Down
OchiCSP10	Unigene23954_All	CCACCATGAGGCTGTGCGCGCTGCTGCTGCTGCTGCTGGTGTCCGTCGTCTGCCCTGCGGCCGCCGCCCCAGAGGAGACGTACCAGCCAATCTACGAGGGTACAGAAGTGGAAACCATACTACAGGATGACGCCAAGGTGGAGGCCATCCTCAAGTGCCTGCTCAGCGACACGGACGACGTCTGCAGCAAGGAGGACAAGCAGGGCAAAGACATGCTGCCCGAGGCGCTAGCCACACAGTGCGCCAAGTGCACAGAAAAGCAGAAGCAAAGCATGGCCAAGTTCTTCGCGCACGCGTCAAAGAAGTTCCCCGACATGTTCAAGCAAGTGGCTGCCAAGTACGATCCTAAGGGCGAGAACCTGCCCAAGTTCACGGGTGGGCGCAGCCACGCAGCCTAGT…	553	MRLCALLLLLLVSVVCPAAAAPEETYQPIYEGTEVETILQDDAKVEAILKCLLSDTDDVCSKEDKQGKDMLPEALATQCAKCTEKQKQSMAKFFAHASKKFPDMFKQVAAKYDPKGENLPKFTGGRSHAA	130	Complete ORF	CAJ01462.1	hypothetical protein [Locusta migratoria]	1e-19	45.69	1-20	PF03392	SSF100910	PTHR11257	105	304	15.68	35.02	1.30968	8.05686e-18	2.71908e-16	Up
OchiCSP11	Unigene10537_All	GCCAGAGCTACAGCCACGTGACAGACGACATGCAGACGCCGACGCTCGCCCTGCTGGTGGTGACGGCGCTGGCCGCCGCGGCCGCCGCCGACGACCGCTACGCCAAGTACGACCACGTGGACGTGGAGCGCATGCTCCGCAACCAGCGCTTCGTCAACGCCGCCATCAAGTGCTTGCTCGAGGAAGGGCCCTGCACGCCCGAGATCAGGGACCTCAAAAAGATGCTGCCGGACGCGCTGAAGTCTGACTGTTCCAAGTGCTCCCCGAAGCAGAAGGACAACGTGCGCAAGGTGGTGGACTTCATGATGAAGCAGCGGGCGGCCGACTGGACCCGCCTGTCGCGCAAGTATGACCCTGAGGGCCTGCACCAGAAGAGAATCGAAGCCAAACTCAAGGAGC…	432	MQTPTLALLVVTALAAAAAADDRYAKYDHVDVERMLRNQRFVNAAIKCLLEEGPCTPEIRDLKKMLPDALKSDCSKCSPKQKDNVRKVVDFMMKQRAADWTRLSRKYDPEGLHQKRIEAKLKEQQLLQQQQQQQ	133	3' lost	CAJ01470.1	hypothetical protein [Locusta migratoria]	2e-60	65	1-20	PF03392	SSF100910	PTHR11257	100	115	22.24	18.82	-0.0223651	0.909426	0.959366	noDEG
OchiCSP12	Unigene14373_All	CCCAGCATGAGGACCGCGACGCTGACGCAGTGCCTGGTGGCGGCCGCGCTCGTGGCGCTGGCCGCGGCCGCCGCGCCGCCAGAGGCGCTCTACTCCAAGTACGAGAACCTCGACGTGGACCGCATGCTGCGCAACCAGCGCTTCGTGGCCGCCACCATCAAGTGCCTCATGGACGAGGGGCCCTGCACCCCGGAGGCCCGCGACCTCAAGAAGGTCCTGCCAGACGCGCTCAAGTCGGACTGTTCCAAGTGCTCTCCCAAGCAAAAGGAAAACGTGCGCAAGGTGTTCGAGTTCATGATGAAGGAGCGCAACGCGGACTGGCAGCGGCTATCCCGCAAGTATGACCCAGATGGCGAGCACAAAAAGCGTCTGGAAGCCAAGCTGAAGGAGCAGCAACAA…	514	MRTATLTQCLVAAALVALAAAAAPPEALYSKYENLDVDRMLRNQRFVAATIKCLMDEGPCTPEARDLKKVLPDALKSDCSKCSPKQKENVRKVFEFMMKERNADWQRLSRKYDPDGEHKKRLEAKLKEQQQQQQQEQHKTAEATTPAA	148	Complete ORF	CAJ01472.1	hypothetical protein [Locusta migratoria]	7e-48	79.84	1-21	PF03392	SSF100910	PTHR11257	102	111	17.03	14.13	-0.102009	0.605254	0.765562	noDEG
OchiCSP13	Unigene14562_All	GCAACACTCAGTAGCCACCCCGACAGCCACTCAGCCAGCGTCAGCATGAACCGCTACGTAGCCCTACTGCTCTGCGCCTCCGTGGCTCTCGTCGCAGCGGCCGAGGAGAAGTACCCGAGCACGTTCGACAACCTGGACCTGAAGGCGCTGCTGGCTGACGAAACTCGCGTGCAGGAGGCGGTCCGCTGCCTGCTGGAGGAGGGAGACGCCGCGTGCAGACCCGCCGGGAAGGCGCTCAAGGAGGTTCTGCCCGAAATAGTGCGCACAGACTGCGCCAAATGCACCGAGACGCAGCACAAGAAGATCGGCGGCTTCTTCGGTGAGATCTCCCGCCGCAACCCAGACCTGATGAAGAAGCTGCTGGACAAGTACGACC	376	MNRYVALLLCASVALVAAAEEKYPSTFDNLDLKALLADETRVQEAVRCLLEEGDAACRPAGKALKEVLPEIVRTDCAKCTETQHKKIGGFFGEISRRNPDLMKKLLDKYD	109	3' lost	CAJ01474.1	hypothetical protein [Locusta migratoria]	2e-45	90	1-18	PF03392	SSF100910	PTHR11257	8	11	2.3	2.23	0.235433	0.723194	0.849731	noDEG
^ Protein domains predicted using InterPro protein sequence analysis & classification database as implemated in Geneious
wPfam − PF03392 (insect pheromone-binding protein, A10/OS-D)
✚ Smoreerfamily − SSF100910 (chemosensory protein Csp2)
★ PANTHER − PTHR11257 (chemosensory protein-related)

## Sheet: Sheet 3-OR
Gene Name	Unigene ID	Transcript 5'-3'	Transcript length	Predicted protein sequence	Predicted protein length	Status	GenBank accession	NR_annotation	E value	Identities(%)	Predicted Domains^			MA_rawfragments	FA_rawfragments	MA_FPKM	FA_FPKM	log2Fold	pvalue	qvalue	Diff
											TMD (No.)	Pfam	PANTHER★
OchiOR1	Unigene11810_All	AAAAAAAAAAAAAGAATTCCAGGAGTTATCCATCGATTCGAGAATTTCTAGAAGTTTGACGGCGAGGTCTGTCGGCCACTGTGTGACTGTGTGTGGAGTTGCGGCGTCCTGAGCAGTTTGCCTGCAGAAATGCGGCGCTAAGCGCCTGTGGAGAGTGGCGTGTGATCGACTGCCGGCACCTCACCAGGAAGCAACCAGTCTGGATTTCTACTCGTCTGACAGCGTCCCAAACTCAGCTTAAAGATGCAGAAGCCGCACGGGCTGGTGGCGGACCTATGGCCGCTGATCCGCATGGTGCAGTACTCGGGCCACTGGATGCTCGAGTACAGCGGCGGCGGCGTCACGGCCCTGCGCGCCATCTACAGCTCGGTGGTGTCGGTGCTGGTGGTGACGCAGTTC…	2408	MQKPHGLVADLWPLIRMVQYSGHWMLEYSGGGVTALRAIYSSVVSVLVVTQFALMAVNLIQRSGDVNELAANTITVLFFLHPITKFAYFAVRSKAFYRTLATWNQSNNHPLFSESQARFHQLSVVRMRRLVMYVVAVTALSVVAWTSITFMGDSTREVPDPDNANETITEEIPRLMINTWYPFDAVSGMGYMLGFVYQLYWLTATLMHSNLMDVMFCCWLIYACEQLVHLKEIMKPLMELSATLDTVVPHTSELFRAASTLPTNEPLYGMGPDMSNGVTDGMTIRGIYSSQRDFSGFNRRNSALSTVREADAGGAVTSAGGIGPNGLSKRQEMLVRSAIKYWVERHKHVVRFVGNIGDAYGAALLLHMLTTTVTLTLLAYQATKIDSVDVYAASVLGYL…	487	Complete ORF	ALD51504.1	odorant receptor co [Locusta migratoria]	0	94.25	7	PF02949	PTHR21137	12883	18842	318.52	391.73	0.324484	3.88188e-88	6.37672e-86	noDEG
OchiOR2	CL412.Contig1_All	CGACGTTTTGTCTCACACAGGTGCTCGCGGCGGCACAACCCAAGTCATCTCTCTCACCGGAGACTCTTAATACTTACGCTCATTTGCATTCGAACTGCGAAGGTGATGGCAGCTCCCGTACACAGTGGCGGAAAGGTGTGGGACACGACGAAGGAGGCGGACGCCATACTGGGCCCCACCGCCCCCATCATGCGCGCCATGGGCTTGTGGCAGCCGCCGGGCGGCCGGACCGCTGGCGCCAAGCTGCTGGTGGCGGTCGGCATAGTTTTAGTCTTCACCATCTCCGTCGCCTGCGGCATCGCCAAGATCGTGATCGACCCTCCGTCTGAGCAGGACACCTTCATAGAGGCGATCTTCACGTACGCCTGCACCATCACCTGGGAAGTCAGGATTGTGGTG…	1840	MAAPVHSGGKVWDTTKEADAILGPTAPIMRAMGLWQPPGGRTAGAKLLVAVGIVLVFTISVACGIAKIVIDPPSEQDTFIEAIFTYACTITWEVRIVVILVRQRQLQQLVLDVLNMRKRFTENGTVLRESYRRRSTIVCVVWVAFPLVGIPMWFVEPALSKTVVTTAENVTTVIRKTPVIMWMPMDTQRHPNYEITYVIQIAIICSIVQTNVVVDLFFACLMINITADLEILNNNIANMRLNIEDAFLKKSAEGVKISAGWETTYKSKKSVAEEGEYYGNITAHASTTTESRVKMYRTLVKNIQHHQCIMSVINDLESIMSETSVLLLAVNSVNICMQALGFVDGFRPGAKRSTALKKVLTFPAYINQTAHYCWYGQEIIDQSERLLEAAFSCGWADGD…	449	Complete ORF	ALD51406.1	odorant receptor 105 [Locusta migratoria]	2e-170	64.75	4	PF02949	PTHR21137	285	735	9.45	20.4	1.14278	3.18885e-33	2.02476e-31	Up
OchiOR3	Unigene16722_All	GTGACATCTATAGAGAACAGGAGCGGTCATGGGGCGTCCCCGCAAGTCCTTGGAGTGCCCTGGAGCAGCTTTCATGCGCCTGACGGGTCTCTGGCTGCCTCAGGACCCCGCCTCTCGCCTGCTGCCTGCCATTCGCAGCTGTCTGTCAGTAGGCTTCCTCGCTTTTCTGGCAGTCAGCGCTGCTCTCAAACTGTGCATGGACACTCCGCAAGAGCTGGAGGAGCTCGCTACTTGCTCTTTTGCTCTTATCATTTGCAGTGTGTTGTCTATAAGGGTCATCGCCTTTATCTGGTACGGGGACACATTTCGGCAGCTGCTGCAGTTGCTGGATGACACAAAGACTGAGCACAACGAAGGAAAAAACAATGACAGCACAAGACGCAGCTACCAGATGTTGGT…	1447	MGRPRKSLECPGAAFMRLTGLWLPQDPASRLLPAIRSCLSVGFLAFLAVSAALKLCMDTPQELEELATCSFALIICSVLSIRVIAFIWYGDTFRQLLQLLDDTKTEHNEGKNNDSTRRSYQMLVERVYLVFMVAVVCSLIGWVSSPLLFRAVLGNDDRSRQLPLPIWIPTDVYASPTYEIVYAAQSIGLVVIAVCTTCINTFFIHLMQGIGAEFEVLSDNLSSMQKNHEQTGKSRNEGGIWECQSIMEKQALSCADINAECITDEQIHRQLTKNFQHHQTLLRSISLLQTTMNVPIFILLTINMLNLCANLFIAGVLLQRDGGVSKALNSLTSIPPLLYETGLYCVFGHVLTDQSEKLLHSAFSCGWIERDIRFRRDLFMFMTATLQPVELTVGRMTKL…	425	Complete ORF	ALD51395.1	odorant receptor 130 [Locusta migratoria]	8e-107	48.21	5	PF02949	PTHR21137	271	508	11.8	18.35	0.682536	1.06169e-10	2.11689e-09	noDEG
OchiOR4	Unigene1818_All	CAGACTGACAGCCATTTGGCGTCCGCGCGCCTCGAAGCGATCAACCTATCTCATTTCACTTGCCACTCCTGCTGCTCTTCCACATCACAGGAGCAGAGCCAGCCGATGGCGCGCCTGAAGAGCGGCCTTGCTGCGGCGACCGCCCAGCGCGTGCTGCGCCTCAACGTGCGGCTGCTGACGCTGGCCGGCGCGTGGCCGCCCCGCGCGCGCGGCGCCTGCGGCCGGCTGTTCCCGCTCTACACGGCCAGCATCTACTTCTGCCAGAGCGCCACCATCGCCATGGGCGTCTGGCTCACCTACGACCTGTGGGGCGACGTCGACGCGATCATGCTGACGTACGTCAACACCTTCACGCTGATCGGCGGCCTCATCAAGCTGGCCTACTTCTCCAGCAGCGTC…	2146	MARLKSGLAAATAQRVLRLNVRLLTLAGAWPPRARGACGRLFPLYTASIYFCQSATIAMGVWLTYDLWGDVDAIMLTYVNTFTLIGGLIKLAYFSSSVRDYRQLVEVLRDVTREQWPHCERDAELMAAFTEAYRKGLWMTLGPLAYLNILGPTWFFMPLIVRALGSEERLLPFVNMRESVTEIFPLYVTIYLVQVYSIFYWNFISVGLDMFFVTCMIHVAAQLKILNGRLSKLGKDQADDAYRAVLDPKDIRGFGGSQKRPFTRDGRSRDMYEELRNCIKTHQHILSLLKALQHVMSPVAMTQFMCSASGACITLFQATFNPEGNSTLKCLMFLPMPTFQMFIYCWGGHEIVVQEELLSLSGYRSAWVGTGRRISKVLHILMCNAQKPLQLTAGKFYPV…	430	Complete ORF	ALD51381.1	odorant receptor 48 [Locusta migratoria]	0	78.07	4	PF02949	PTHR21137	255	384	7.15	9.03	0.36661	0.00144502	0.00861154	noDEG
OchiOR5	Unigene13189_All	GAACGGCCCCGAGTAGGTTTCACTTGTCTTATTAGGGAGGAAGAGTAGCAGGGAAAGAGTTTTAAAGTCCACACGGAGTAGTCACCGGGACTCATTATTGACAACAGATGAAGGGCGGAGCGCCGGAGGATCTGCAGCGGCCGCTGACGTGGGCGGCTAGCGGCCAGTCGATCCTCAAGCTCAACATCCGCCACCTGTGGTTGTGTGGCATGTGGCCGCTGCCCGGCTCGTGGATCTTTAAGGTGTATAGCTACTTGTGCCTCGCAGTTGGCGTCTGGAACGCGATCGAGTGCTCGCTGGCCGTCTACTTCACCTGGGGGGACATGGAGGAGACGACGCTGGTGCTCATCACCCTGTTCACCCTGGGCTGCTGCACCGTCAAGATGGCCTACTTCATGC…	2150	MKGGAPEDLQRPLTWAASGQSILKLNIRHLWLCGMWPLPGSWIFKVYSYLCLAVGVWNAIECSLAVYFTWGDMEETTLVLITLFTLGCCTVKMAYFMRHQGEFNALARRVEMLLSLQSEFCSADPTMADIQRSAQRRGFRLTLTMLLVVFSQCFVWFPMPLVAGGDQRRLPFGQHAWDNNTNLYELSYVLQCAAGNWTTQLGFGFDLLFVSVMLILAAQLQILTLRISSLKPENSKIAIELGSKSEKALVSNFGDYMYENLCLTIKSHQKILRFVNHLEDTMSSVVLIQFFFSVLVSCVGLFQATYSTDYTGVFKSVSFLPVLGSQVFMYCWAAHSVTEQAEAVALAAYSCSWVEASGRFKHALRILVSRAQKPVVLTVGRLYPINREVFISLVNASYS…	410	Complete ORF	ALD51496.1	odorant receptor 75 [Locusta migratoria]	2e-160	66.59	5	PF02949	PTHR21137	186	379	5.2	8.89	0.802896	1.30846e-10	2.58868e-09	noDEG
OchiOR6	CL1567.Contig2_All	AAACGCGATTCAATCACCGAAGGGCAGCAAGCATTCTCACGAAGCGGAGCTCTTAAAAACCTTTAATCGAGGTGAGACCAAGAGGTGACACAGTTGCAGCTGTAGCGAAATTCTCGACAACTTCTGCGCTCCTGGACAAAGGGCAGGGAGACAGGCACTATGGCGGAGAAGACAGCGTCGCCTTCCCTGGCGGAGGCCGCTGAGGCAGCCAGCGACCTCAACTACCTGTTGCGGGCCCTCCACTGGACGGCCGTCCTGCGACACCCACGGGGCGCCGCCGGCTCACCACTCTTGTTCCGCCTCTGCACCATCGCCATGGCGACCTTCAGCGTCACCTTCTTCTTCGCCGAAGTAATAGTGCTGTTCCGCGTGGGCACAGCAGACCTGGACGTCTTCACG…	1632	MAEKTASPSLAEAAEAASDLNYLLRALHWTAVLRHPRGAAGSPLLFRLCTIAMATFSVTFFFAEVIVLFRVGTADLDVFTMTLGVVDTDSTWLFRLVHTALFERAFHKLALQVANDFAEFLTWDDIPVVRAQCRTVRRFTLTYIWFGIGACAYYLVSPVSEEGLPFIMALPFDARPPLVFAATWTYCTITTLHVVVMTMVLDSFYVSLIAQLRIQLSLLSTKIVSLAKEVSAKPEQSSEKPQPSELHDRLLKCIRHHQTIIKNADLLERSLGAMLLTQSVSIGASACFQMYQVVTSSNGLQQAGKFGSHLFAMLAELFVYCYFGDDLITESENLALAAYDAVTSLQECPLSIKRSLLLLMTRAQRPLRITAGGFFPLSRESYVSVVNVSYSFFAILRNF…	403	Complete ORF	ALD51481.1	odorant receptor 24 [Locusta migratoria]	2e-168	75.99	3	PF02949	PTHR21137	60	272	2.28	8.6	1.95657	1.73892e-27	9.03136e-26	Up
OchiOR7	CL476.Contig2_All	GTTTTCTGGAGTTTTCAACGTAGGAGCAGATCCCGAGAAGACAGAAGAGGTGCGCTGGTGGCGATGCCGGAAGCGATCCCCTGGTCGGATACGGCGCTGTGGGTGAACGCGCGCTTCCTGGCGCTGGCCGGCGTGTGGCGGCCGCCCTGGCTGCAGCCTCCGTGGTTCCTGCTGTACCGGGCGTGGGTGCTCTTCACGCTGCTCAGCTTCCTGGTCGCCCAGTTCCAGGGCCTCTGGTACTTCTGGGGCAACATGGACAAGATCACCCACGACATATGTCTGCAGATCGCCGTCACTCAGAGCCTCATCAAGTTCTTCTCTTTCGTTTTGAGGCAGGACGATTTCTTTCGGATGGTGCATAAGATTGACAATATCAGAGCGGAGCAAAGCCAGACCGGG…	1469	MPEAIPWSDTALWVNARFLALAGVWRPPWLQPPWFLLYRAWVLFTLLSFLVAQFQGLWYFWGNMDKITHDICLQIAVTQSLIKFFSFVLRQDDFFRMVHKIDNIRAEQSQTGDQEILSILEASYKSAKAITTYMTIMGSLITTFWGIIPSIMRKAGVFPPERELPATARYTSMDTVTPVYEILCTLQYFSMQYGFFVAVGSNLLYISIIIHASGQLEVLNARLARVGHTTVNSSANTSKKQKATEKILDLLSSEELAWNDLCYCIKQHQVVIELIKEIERLLSNIVLSQFMGATIIICVTLYQSSKNTENFAALFMLEAYLGVVTFEIFMYCWYAEDTLHQSSRLADSAYSCAWPDAPPKLKLALVLIICRTQRPLGITAGKFYFVSRETFVRLMSASY…	411	Complete ORF	ALD51499.1	odorant receptor 34 [Locusta migratoria]	8e-166	69.78	5	PF02949	PTHR21137	116	240	4.97	8.53	0.824911	1.65932e-07	2.27289e-06	noDEG
OchiOR8	Unigene234_All	CGGCAGAGTTCTCGGACCAGTGGTCGAGGCTCACTGAGCGCTGGCAGCAGAGAGTCGCCGCCCACCCAGCATGCCGTCCGTCCCTGTGGAGCAGTCTCTGGCCGCTGCAACGCAGCAGGCGTGCGACCTGGACTACCTGCTGAGCTTCCTGCACTGGACAGGCACCATGCGGCACCCCCGCGCCGGGCCGATGTCCTCGCGCGCCTTCTACGTGGCCAACTCGGCGGTGACGCTGGCCTTCGTCTACTTCGTCTGCTCTCAGGTGGTCATCCTGTTCCGCAATGGCACGTCAGACCTGGACAGCTTCACCCTCACCCTCAGCCTTATCGACACCCAGGGCACGTGGCTGCTGCGCATCCGACACATCGCCGCCTTCGAGTCTCACTTCCACAGGCTGGC…	2390	MPSVPVEQSLAAATQQACDLDYLLSFLHWTGTMRHPRAGPMSSRAFYVANSAVTLAFVYFVCSQVVILFRNGTSDLDSFTLTLSLIDTQGTWLLRIRHIAAFESHFHRLAYQVGRDFGQFASAEDVGCLRAGSRRMRAVMLLYLAFGLAECCVWLTAPASETGLPFVLALPYDVTRPGAYVATAVYCCFITLHTIMANFAADAFNVSLIVQLRMQLTLLNRNISNCNKAIEEPHPVAYKAESADATRPYLPFSASDVSYRLQKNILHHQAIIRNVELLQSCLGSILLGQSLSIGISVCFQLYQVAKSAESLQDAGKYSSYLFTMFAELFVYCWFADDLISESEKVAQAAYDAVPSLLECPVSLKRSLLILMHRAQRPLSITAAGLFPLSRESFVSIVNV…	413	Complete ORF	ALD51370.1	odorant receptor 16 [Locusta migratoria]	0	86	3	PF02949	PTHR21137	145	362	3.61	7.59	1.09594	3.69458e-16	1.13392e-14	Up
OchiOR9	Unigene20641_All	CGCCTTTTGTGATTCTGTGTAGTGGGCGGCAGTAACTGAAGGCAAATCAAGCAAAGCAACTGCAGGCAGTTCCATGGCGGGGCGCGCCCGCCCTAGGGAGTCCGTCCTGGGCTCCAGTGCGACGCCACTGCGACTGCTGGGCCTCTGGTCAGCAGGAGGAGAGGACGCCGGTCGCGCTGCCGGCCTGCTCACTGGCAGTGTCGCGCTGGCTGTCATTTGTGGGGCCACCATTATATCTCTCCTTAAGCTACTGATGGACCGGCCGAGAGAACTCGAGGAGCTAGTCGCGTGCATCTTCGTCGTAACAATGCACAGTGAAATCTTTATCAAGACGGTTTGCTTCGTTATGGAAGGATCTACCCTGCGCCAACTAATACAGCTATTGTCCGAGATGAGAGG…	1363	MAGRARPRESVLGSSATPLRLLGLWSAGGEDAGRAAGLLTGSVALAVICGATIISLLKLLMDRPRELEELVACIFVVTMHSEIFIKTVCFVMEGSTLRQLIQLLSEMRGENSVHERQEEIRRRYQRLGDRVFVAIMGMTMVTASLWMAAPLAQQVVSGPRRAPRLLPLPAWLPLDIYASPTFQLLYAAQVLFIPLVATITICCDCVFIDLMLRVAAELHILNDSVSGLRKIDLDATAATRNECKSIDVVSDDEINLRLVKSVKHHQAIMKSVALLEKAMSTPIFVLFVSMMIAICADIFAAAAILRTDEGTTKAAKLILALPPLLYDVGVYCTFGQIITDQSEKLMHSAYSCGWVDCDVRFRRSLLTFSMGARRPLEITVGSMYKLSKETFLQVLHGSY…	412	Complete ORF	ALD51492.1	odorant receptor 118 [Locusta migratoria]	7e-121	54.52	4	PF02949	PTHR21137	76	193	3.55	7.45	1.12053	1.38529e-09	2.42535e-08	Up
OchiOR10	Unigene24137_All	CGCAGCTTCTACCGGACTTCGCAGACTCTCATCCAACAAAACTGCGGTTTTTGGACCATGGCGACAATTCCTGTAACAGAGGGGGTGACGTCACCGCTGCGCGTGCAGATTCCGCTGCACCTGGCCGTGCTGAGGGCGGTGAGCCTGTGGGCGCCGGGCCGGCGGTCTGCACAGCGCCACGTGTACCACGTGTACCACGTGTACACGGCAGGCGTGCTGGCGCTGCTGGCGGCGCTGGTGGCGGGGCAGGTGCTGGCGGCGCGCTACTTCTGGGGGGACCTGCTCAGCGTCGCCATGAACACCTGCGTCGTCTTCACCTACGTCTCGGCCGCGCTGAAGGCTATCACCTTCGTCACCCTGCGCCAGTTTGCAGACACTCTAATCGAGGATATCAACATA…	1468	MATIPVTEGVTSPLRVQIPLHLAVLRAVSLWAPGRRSAQRHVYHVYHVYTAGVLALLAALVAGQVLAARYFWGDLLSVAMNTCVVFTYVSAALKAITFVTLRQFADTLIEDINIGLETFGESCRQEKEAVYAACARQSRLLMCVFVGKVGVAHAYWLALPATKMAACQTTDCRIKEGLPTVVWFPFPFTESPFYEVTYVFVSLALFYGYIVTTMVDSFFHALIIYNTGQLRVLNLLAARVCDPEPGAKACSEQQMLQRMAELVQGHTHVDRCVQRLSALLGPILLGQFLSNIASISITAFVATVMKADSQWLVKFGSYLYVVAEETLIYCWLGDNVLTESARLQTSAYSSDWTGAPRSLRRQLPIVLSRAHRPLLLTASKFYTISRETFLLMMNASFSY…	409	Complete ORF	AHB17947.1	odorant receptor 5 [Locusta migratoria]	7e-108	50.98	6	PF02949	PTHR21137	122	205	5.23	7.3	0.524744	0.00118951	0.00725536	noDEG
OchiOR11	CL1051.Contig1_All	ATTCCGTCAAACCACCTCAGCCCACGTAACCTGAAGCGAACAGTTAAAATTCCGACGTAAGGCCGGCAGTCTTTTTGTTGTCGTCTGGGAGGCGTGAACAGCGCGAGGGAGCTGAGCGTAGTCCGCTGGAATCAACTCTGTCTGCCTGCGCCAAACACCTAAGGACCATGGACGGTAAGAAGGGCGCCCCCATCCAGCTGTTGGGTCCGGAAATCCCAGTGCTGCAGCTGTTGGGCCTATGGAGGGCGGAGCAGAGCGCCGGGAACTGGGTGGTAGCTCTCCGCGCCGCCCTTACCCTGGTCTCCATCGCTGTGATTCCTGCCGGGGCTGTCCTCAGGCTGTGTGGAGAGTTTCCAAAGGAGCTGGAGGAGCTGGCGCTCTGCTGCTTCATTCTGTTTA…	1570	MDGKKGAPIQLLGPEIPVLQLLGLWRAEQSAGNWVVALRAALTLVSIAVIPAGAVLRLCGEFPKELEELALCCFILFITIGSLIKGAFFIGEGEMLRELVHLLETTREMYGISGSSDCIRNHYKRMVDRLYIYFQVMSITAVIWWSGYPLLSNGTVEEDQENLRQLPIPLWLPLDVHSSPMYEMLYFLQTFCLTVTSEAAICLDVFFVRLMMLVAAEIEVLNQSVSTMHNINLKSTVSDDHMYVVRDGDQPWLVPGSGQPSQAANKSSEKVSDEEMFSTIVKNVLHHQTILRSISLLQSAMNVSTFIILFINMANLCFNTFVMAGLLQRDGNLTNAMKALFTVPSILFQTALYCIFGQITTDQSEKLSHSAFDCGWINCSSNFKRSLLIFMTMAGRPVE…	434	Complete ORF	AFL03413.1	odorant receptor 2 [Locusta migratoria]	1e-120	51.14	6	PF02949	PTHR21137	86	207	3.41	6.83	1.04322	3.23893e-09	5.474e-08	Up
OchiOR12	CL6869.Contig1_All	TAGAGGGAACGTGCTGATGTGCTGCAAGTAAGGAGACACCAGTAAAGCACCTGTTCCGCTGCTGAACGGATCAGTCGTACAGTTTAATACCTCACTGATCTCACATAGTGAAGACTAATGAAGGAGAAAGACGTTCAGCAGTGGGGAACCAGTTCAGAAGCAGAGGCAGATGAGACAGCCAGCCTCACATGGAGGGAGACAGCCACGTCTGTGCTGAAGGTGAACGTGCGCTGCCTATTCCTGAATGGCTCGTGGCCCCTCCCGGACTGCTGGATCTACCACGTCTTCTTCTCCATCGTCTTCGCTTCGAAACTGTGCAACATGGTAGAGGCGTTTGTGAGCATCTACTTGAGCGAGGGCGGGCTCCAGGAGATCACACTGGTGCTGCCAAACACGCTG…	2014	MKEKDVQQWGTSSEAEADETASLTWRETATSVLKVNVRCLFLNGSWPLPDCWIYHVFFSIVFASKLCNMVEAFVSIYLSEGGLQEITLVLPNTLLIASGVFKMAFFYSERGRYYGLVRRTDRLTVSQLAASGEVGAAIVSAAKRHCLKLTSAVFAFISLQIVVWFPMPLIAYPGQHKLPFIQIPYNNETEIPIYELSYALQCFSSFFNIFITLGMDCLFAVIMIHVAAQFEILISRIRSLGVATTVMQSKPSLNQHIRNPQTSINAQMQPKEMLEYQDRVTEAHDKMYSDLCGCIETHQQIISFARHMEAVMSPIALTQFAFSVLGACVTLYQATYSEDFNAVFRCAVFLPIPGSQVYLYCWAAHHVMEQSEAVLPAAYACFWVDASDRFKRTLRILMC…	440	Complete ORF	ALD51473.1	odorant receptor 65, partial [Locusta migratoria]	1e-145	66.92	4	PF02949	PTHR21137	206	264	6.19	6.65	0.133894	0.31521	0.51578	noDEG
OchiOR13	Unigene5299_All	AAAGTGGCATAGACATTGCGCAGAATATCGACGTGCATGCCAAGAAAATGTCTGCGGAAGCCGATCGATGTCTTACTTCATTGCCCGGCCCAAATTCTGTGCTGGACGTGAATATTGGCGTGCTCAAAGTGGCTGGCCTTTGGCCTACACGACCATTCAGTCTTTTCGCCATTTACACTGCTTGGATTTACTTAACACAATGGGCCGTATTCGCACTGGACTCCATGTCGCTATACTATTACTGGGGCAACCTTAACATGATAACAGCTGTATTCTGCAACCTTACCTCAATAACTGCTGGAATTATTAAAATGACTCATTTCTTTGTATACAAGCAGAGCTATTACTCGCTAGTTAACAAATTAGACGCACTGGTCGCTTCTCAGCAACAGATTACAG…	1472	MSAEADRCLTSLPGPNSVLDVNIGVLKVAGLWPTRPFSLFAIYTAWIYLTQWAVFALDSMSLYYYWGNLNMITAVFCNLTSITAGIIKMTHFFVYKQSYYSLVNKLDALVASQQQITDPNVRSKSILNQTSKLNKYSTYIIVTYGNLVGVPWIILPFVMDSGETERTLPVVAWYGIRQDRSPVFEIGYVLQCLTIMYWFFASWGLDLFFGALMIHLAGQFKILNNRIENLRPKVENVSSGISSTTENEQKILNIKRDALQRRISFQHQNDELLLDLRRCIKDHQHMINFMNDLEQTVNFVVLVQFMAGTLVICVNLFQAALNVQDFSSMLKVCMYMFELILQLFIYCWCAHDVMVESERLSTSAYFSEWTGAPRRFTTALHILMARAQKPLTVSAGRIY…	426	Complete ORF	ALD51373.1	odorant receptor 39 [Locusta migratoria]	0	84.45	6	PF02949	PTHR21137	106	182	4.53	6.45	0.555876	0.00129119	0.00779768	noDEG
OchiOR14	CL5494.Contig2_All	AACAGGTGTTGTTTAGAAGATACAGCCAGAGCGGAATTTGATTTGCTGTGAACTGTTAGAATCAGCAGTGGGGATTGTGCTCTCCCAGCCATTCTTCGTTTATTTTCGCGCCCATGGAGGACGGGCCACTGACGTGGCGGGGCACGGCGTCCTCCATCGTGAAGGTGGACGTGCGCATTCTGTACGCCACAGGCGTCTGGGCCCTGCCGGTGACGAGAACGTATCGACTGTACACGGGGGTCATCTTGGTGCTGGTCCTGGGGTACTCTGTGGAAGCCGTAATCCACATCTGGCTGGTGCGCAACAATATGGATGCAGTCACCCTCGCGATGTCCTGCTACGCGGTGGTCTTCACCAGCGCGTGCAAACTCCTGTCCTTCCTTCAGCACGAGCCCAACT…	1639	MEDGPLTWRGTASSIVKVDVRILYATGVWALPVTRTYRLYTGVILVLVLGYSVEAVIHIWLVRNNMDAVTLAMSCYAVVFTSACKLLSFLQHEPNYWRLVRWLDALVADQKRYVQEKPPLQEIFDEAQKRARRIPKGLLIYNTSLILIWVFLPLLAPPGQRPLPFQQLPLSEKDDFTLFLASYLLQSIGMLYMNLVSSSLDGFFTAVMIQTAAQLKILALRLTDLRQNNEGQKQRIISDVNEKPPKNAMTDAVYEELCLCIRTHQEITSFVAHLESVMKSIAALQLATGVINGCLMIFPTAASSESGALLKCVACVPTISAQVLIYCLGAHSVQEQGEAVSLAAYSCGWPDMSHSSRRALLVLLTRAMKRLTLTAGGIYTIERATFLSLLNAGYSYYAL…	406	Complete ORF	ALD51461.1	odorant receptor 58 [Locusta migratoria]	1e-171	74.45	4	PF02949	PTHR21137	153	192	5.78	6.05	0.103576	0.505376	0.694378	noDEG
OchiOR15	CL4033.Contig3_All	CGCCTGCGGCAGCGTTGTCACGAGTCTGCTAGCAACTAGCGTGCCCACTGGGCGATTGCCTTCCAGCACAGTAGACCGGCACAGTAACAGACAGATGGAGGTGGAGGCGCAGGCGCGCTCGCTGATGGGCCCTAGCGGCTCGGTGCTGCGGCTGTTGGGCATGTGGCGGCCCCCCGGCTCGGCGAGCGCCGGCCCGCACCTGCTGGCCGCCCTCTTCGTCGTCGCCACCGACGCTCTCGTGTCCGCCTCCAGCGTCGTCCAGCTCATAGTCGACACTCCGACCGACCCCGAGACTCTGCGCGACGTCTTCTTCCAGAGCACTTGCAGCTGCGCCTGGGCCATCAGGGTGGTGCTCTTCATGCAGGAGAGGCGCCGTCTGGGACGTCTTGTGATAACGCT…	1824	MEVEAQARSLMGPSGSVLRLLGMWRPPGSASAGPHLLAALFVVATDALVSASSVVQLIVDTPTDPETLRDVFFQSTCSCAWAIRVVLFMQERRRLGRLVITLLDARKKYPEHVPGTRSSYDRHATMVFFVWQLLPLITMLMWAVEPMVGGPELVWVGNSSVEMRREPLVLWLPIDTQQSPFYEIVFAVQVVGIVTVAEVSILQDIFFVCLMIYVTAEVAVLDKNVSTLRLFRVDGNQSQMHGAGDVAAGGRGRYKDTESDESGEWSAAPPLPLPRNSLLYSQDMDGEKRRLYGSLKTNIQHHQTIILCVNELEQVMSNSTYIILLVNALTICLHAFGFVELFQGGGKGTAVVKRLLAFPIYLGQTALFCLIGQSLIDHSERLQDAAFSCGWPGTDGRFC…	446	Complete ORF	ALD51403.1	odorant receptor 107 [Locusta migratoria]	9e-176	71.85	4	PF02949	PTHR21137	89	212	2.98	5.94	1.02819	3.23638e-09	5.47182e-08	Up
OchiOR16	CL3327.Contig1_All	GAGATCTCTCGTTCCGTCGAACGTCGACCGACACCAGCGTACGATAGCGTCCTAGCATCCTTTCATCCACAGTACTTGAAAGGTCCGTTGGCGACCGACCCAGCTGCTGCGTCTGATGGCGGACACGGCTCGCCAGTGCGATGCGCTGCTCGGCCCCAGCGCGGTGGCCCTGTCCTGGATCGGCATCTGGAGCTCTCCAGGCCGCAGCCCGGGGTTCCGGCAGCTGGGCGCCATATTCGTCTGCACCGTCGACATCATTGTTCCACTTCTGACGTGCGTACAGATGCTCTACTACACGCCGGAGGACCCTGCAGTCTTTCGCGAGGTCTTCTTCATCTGCACCTGCGGTTCCTCCTGGGCAGTAAAGGTGGTGGCGTTCTTGCTGTACCAGAAGAGAAT…	1543	MADTARQCDALLGPSAVALSWIGIWSSPGRSPGFRQLGAIFVCTVDIIVPLLTCVQMLYYTPEDPAVFREVFFICTCGSSWAVKVVAFLLYQKRIQEMMLKLLDARRRFPDNGAGIREKYARIAYTLFKMWMGVTVTVVMWMGDPLMQSLTTSRPENSTRPLIFWLPIDVPHSPAYEITYAVQAFCIGFVAEISILLDIIVIVLFIHAASEIAVLNENIAGMGISKLRDRPNVSKRDMSLQRLENSTNDVSRSQASYVFSENLPASEVSTDNTGDLLVLDRTVMHWKLYSTLVSNIRHHQLIIEYIEDLEVVTSASLYLLLLANALNICLHSFGIVALFQEGATSSTAIKEVISFPSFLVQTALFCFFGQLIIDEAERLQFSAFSCDWPQADEPFNRAL…	446	Complete ORF	ALD51407.1	odorant receptor 102 [Locusta migratoria]	9e-144	58.11	6	PF02949	PTHR21137	101	169	4.09	5.69	0.518668	0.00359086	0.0183898	noDEG
OchiOR17	Unigene845_All	CAGACAACGACCGCACCTTCCGAGAAGCGCAGCGGCTAAGGGCACTGAACAAGAGATAGCAGCCACTTAACGTTTGCGGAGGAGTGCTGTGCTGAGATGGTGCGGCCCTCAGAGGACGAGCGGCAGGTGCTGGGGCTGGTGGGCGGCCTGCTGGGCTTGGCCGGTGGAGACCGCAGCTCGGTGAGCGCCCGCCTCGCAGAATGGGCCAGAGTCGCTGGCGCCGTCATCAACATCGTCGCCAACATCTCGCTGGTCACCACCACCGGCGTGGAGCTCTTCACCGACAGCTCTGAGGAGACTGAGAGGGCCTCCATCACCGCCTTCCTCTTCTCCGTCTCCACAATCAATTTCGTCAAGGCGGTGTCGCTGGTGCGGCAGCACTGGCGCCTGCGTCGCCTG…	1808	MVRPSEDERQVLGLVGGLLGLAGGDRSSVSARLAEWARVAGAVINIVANISLVTTTGVELFTDSSEETERASITAFLFSVSTINFVKAVSLVRQHWRLRRLVASLVSIRSSFRDSEGARRRYARRGLVLGFIWVMMAEMHVSFWFLDPLISQALVGVKPDRQLPVPLWLPFNQTDPSNYASLFTLEATMLLSGVQLSLYIDALFASLIINVTAELHVLNSNIQSMKRAADHIGGQQSITAASSLAGTLQNAGTSDEAILVTNDTQSEIVSITSSISYFPSVQSKEEKDADNKMYRLLVNNIKHHQLIIKCVSELEKAISMGTFVVLSINILNLCSHIFSLVVMLERDSSTAARIRMFLAVPVFMCQSGLYCLTGQSIVDQSDRLINSAFSCGWADGDER…	450	Complete ORF	ALD51474.1	odorant receptor 109, partial [Locusta migratoria]	1e-137	63.64	3	PF02949	PTHR21137	127	199	4.3	5.63	0.423941	0.00865026	0.037759	noDEG
OchiOR18	Unigene4106_All	AGGATACTGAGTGGTTTTTAAAGCCACTGGTCCCGTCATACTTGTCATAGATTGGAAGGAAAACCTCTGTAAAACAACATAATGGATGCGAAGAATGATATGGAGAGTACTCTTTCGTCTACTTCTGTCGTGCGGTGGAATGTCATTCATCTCCAGATGGCGGGTTTGTGGCCAGTAGAGAATTCGCGACTCTTCGGCCTGTACAAAGCGTGGCTGTTCTTCACTCAGTGCCACATCGTTGTGCTCGAACTTATCGACCTGTGTTCCTATACAGGAGACATGAGCAGAGCAATCCTCAATATCTGCGCCATGGCAACATTCTTCGCCAACGTTTGCAAGATTTTTCACTTCCAATTACTTAAAGACGACTACTTTCGCCTTGTCACCGAACTTGACACT…	1297	MDAKNDMESTLSSTSVVRWNVIHLQMAGLWPVENSRLFGLYKAWLFFTQCHIVVLELIDLCSYTGDMSRAILNICAMATFFANVCKIFHFQLLKDDYFRLVTELDTFVSEQRSKYPNDETVQDLLNASTKRTASITKVVIVYLICWTFMVVPALFLIEAPYGVFPLMAWYPFTANIWPRYEIIITVHFLTIGHCFFTSWGMDLFFGSLMYHLSLQLRLLNYHLSNIRYRHKENGAIRDSIFETMSVSRSHVAGEIIKSETQKQIQEENDGAAENEMYENLLQCIKHHQRIIRYAEGVEKVANPVILVQFLVGVLVLCVVLFQTSSELETLTAFVRFLVYLLELLLQIFIYCWVAHEIFVESERVGEAAYSSDWPDASARYKSALRLVMRRSQRPITISA…	405	3' lost	ALD51463.1	odorant receptor 37 [Locusta migratoria]	4e-110	64.78	4	PF02949	PTHR21137	71	133	3.51	5.43	0.681536	0.000966688	0.00607615	noDEG
OchiOR19	Unigene6859_All	CAAAACCGTTCAGTCGTTCTGCGCTGTCAGATTATTTCACTTTGTTAGGTATCGATCGATGCAGATTCAGATTTCAGCAAATCAAGGCTGCAGTTTAAAAAAACTTGTCACGTAGTGTAATAAAAGCAATCGCTATCGTTTTTTGAGTGTTACCAGCAACCGGATGCAAAAGTATCGGCGAGAAGGTATGGAAAAGCCACTGTCGTGGAACGAGAGCGGTCAGTCGGTCTTAAAACTCAACATCCGCCACCTGTGGCTTTTGGGGGTGTGGCCGTTGAGTCGATCCTCAGTCTTCAAACTGTACACGGGATTCACATTCACTATGGGCATTTGGGGCCTTGTGGAGTGCCTGTCGTATGTTTACTTCTCCTGGGGACACCTTGAAGAAACTACTCTAGT…	1432	MQKYRREGMEKPLSWNESGQSVLKLNIRHLWLLGVWPLSRSSVFKLYTGFTFTMGIWGLVECLSYVYFSWGHLEETTLVLIFTSTCSCGIVKLIFFVRDPQCFSSLVRELDALMDAQSEVTSKDPALAAILQDARRRAFRLTLGMLLFMMSQGIIWFPVPLIAYAGERRLPFSQHGWDNNSNYYELSYIVQCVSASYMSETSFGLDCLFASIMILVAAQLQILKGRILKLNKELIPVIGNESMPAKKSYDKMYDRLCVCIDSHQKILRFSTHLQDVMSPIAMTQFASSVIIACMALFQTTYGEDISAAFKCVSYLPIPGGQVFLYCWAAHNVTENADSVSTAAYSSPWVDCSAKFKRALRILIIRAQKPLVFTAGHLYPIDRGAFLSLVNASYSYYALL…	405	Complete ORF	ALD51494.1	odorant receptor 71 [Locusta migratoria]	1e-164	69.59	3	PF02949	PTHR21137	76	148	3.35	5.41	0.737527	0.000190882	0.00148046	noDEG
OchiOR20	Unigene7464_All	CGTGCGTGGTGCAGCATATTATGTAGCTTCGAAACACATAACTTCCCCGTTCCTTTCCAGACGTCACGGCGACACAATGCAAAAATCTTCTGCACAATATTCCCAGACGGGCGCGGAAGTTCGCCGTGGGCTGGACCTGACTACGAGCAAGCGCGTCCTGCACTGGTTCTCCTGCTGGGGGAACGGCTCTGTGTGGTACGACGCCTACGTGGTGCTGACGCGCCTCAGCGTGGCGGGCGTGGTCGCCACCCAGGTGGGGCTCTTGCCACACGTCTGGGGAGACCTCTACAGTGCCTCACTCTGCGTCTACCTCTTGCTGGCTGTCCTCAGCGCATGGTTCAAGATGGTGCAGTTCAACCTCGCCAGGCCCAAAGTGGATGAACTGCTGCGGGAGGTGAC…	2389	MQKSSAQYSQTGAEVRRGLDLTTSKRVLHWFSCWGNGSVWYDAYVVLTRLSVAGVVATQVGLLPHVWGDLYSASLCVYLLLAVLSAWFKMVQFNLARPKVDELLREVTQELLLHADDVTDSTEDVFRLFQKRAGMFRRAFLVLGHLTILSWAIKPLLDRLLGSGGTLSLPQDAWYPFDTTHSPYYEIAYLHQVLSLYVAAMCVVGVDVFFTTLVMYLTAQLQVLNLHLRAMHCRPRLPPDSHKEPTSDIPGAASKAVVAQKPKEEEGLPPADPDDPHVQLVRNVQHHEVIIRSVTTLEQAMGPCVFVQFLFNVIVICIYAFVLAGVHDMNIGSVVICLTNLISTCVENFGYCWFGNEIMAQSEQLAFSAYSSRWVGGDSHFQKSLMVLTMRAQRPLCLT…	432	Complete ORF	ALD51382.1	odorant receptor 90 [Locusta migratoria]	0	76.62	6	PF02949	PTHR21137	125	248	3.12	5.2	0.764413	6.28579e-07	7.90821e-06	noDEG
OchiOR21	CL2605.Contig1_All	CAGCGTTTGAGCCGAGTCTGCATCTAAGAGCCGCCTTGCGTGAAGTTGAAGAAGTAGCGGAAGCGACTGGGCAGGAAAGAAGTGGGCTTTTTAGGTTGATCATGGGAAAACAGAAAGGCAGGAGTATGAGGCTGGAGGCTTTGGACAGTATAGGCACAGGAGACCTCACCTGGGATGAGGTGAACCGCTCGGTCCTCGGGCACAACATCCGCCTGCTGCACTACATGGGGCTCTGGCCGTTGGAGAGTTCTCGGGCCTACCACTCCTACACGGTCTTCAACCTCGCTCTCAGCGCCGTCGCCATAGTGATGAAGGTCGTCGGGGCCTGCTACGACCTGAGCAACATCGACCAGGTGACCGGTGCTCTGAGCACCGTCCTCCCGATGACAGGCGGACTCA…	1469	MGKQKGRSMRLEALDSIGTGDLTWDEVNRSVLGHNIRLLHYMGLWPLESSRAYHSYTVFNLALSAVAIVMKVVGACYDLSNIDQVTGALSTVLPMTGGLINGLFLLKNRPAICRMVRAVDRLVAHQLEYSEGDGQLAVVVDGARRKTLLVTVGVSGYLFVIASYWVVIAFFQPPSSRILPFVQLPWMAGSGLAHFWCTFALQLYTAPFCSYTTLFVEFFFLAVMLHLSAQFKILGSRFANVGRSQQSGAKAVAEWHLSMLDSDAVYEELRPCVETHQQLLRFVRFLDDVMSPFAMMQFVAGTLAVCVVLFQAANNQDLNTNLKCAGWLPGPSLELFIYCGGAHEVVHEGESLEQAVYASPWYAAQPRVGRAIRLVMTRAQVAPVLTAGHLYPITRPTFV…	418	Complete ORF	ALD51486.1	odorant receptor 51 [Locusta migratoria]	3e-169	73.03	6	PF02949	PTHR21137	69	145	2.95	5.15	0.847385	3.14322e-05	0.000292767	noDEG
OchiOR22	Unigene3247_All	CGGGGGCCCAAGGGCGCGTGCGGCGGTGGCCGCCCCCACCGTCTTGGTGCTGGGCTCCGCCGTCGTTTTGTCCGGAGCCAAGCTGTGTGCCGACCCGCCCGCCGTCTACGAGGAGCTCATCGCCGTCATCTTCATCCTGGTGGCCAGCGTCAGCTGGACCTTCAAGGCGGCGGCGTTCGTTGGTCAGCGGGAGCGGCTGCAGGAGCTGGCGGCGTGCCTGGTGGCCAGCGGCCGGCGCTACGGGGGCGGCGGGGGCGGCATCCGCGGGCAGTACCGCGCGCTCGCGCGACGCGTCTTCATCTACACTCAGCAGGTGATCACGGCAGTACCGGTCGCGATGTGGGCTCTGGAGCCGCTGCTGTCCGGCGGCCAGAACACGCCGCTGCCCGCGTGGCTGCC…	1566	MVLGSAVVLSGAKLCADPPAVYEELIAVIFILVASVSWTFKAAAFVGQRERLQELAACLVASGRRYGGGGGGIRGQYRALARRVFIYTQQVITAVPVAMWALEPLLSGGQNTPLPAWLPLDLHAAPTYQLLCTYQAVAVTLSVEASVCLDMFFIVLMIAVAAELHILNDNLEAIRLQPLDKLPLKSADDSATPWRRNVSSLADKQLPCSQQDEYHRENRKSANVLYGTADAQEVMYRSLVKNIQHHQLILKCVKELETAMNYSIFVLLFLNMVTICTLIISTTVLLQNDSDPTSLYKMVSSLPIVMFQTGLFCIFGQMIIDQSEQLPGAAFSSGWLEGDVRLRRALLLMMRRAANPLRITVGRMYPLSRHTYLQLLNGSYTIFNMMYQVRGRSD	394	5' lost	ALD51392.1	odorant receptor 97 [Locusta migratoria]	0	83.09	5	PF02949	PTHR21137	117	152	4.66	5.03	0.153563	0.383721	0.579376	noDEG
OchiOR23	Unigene4327_All	CATGATAGATGCCAGTTTCATTTCCAGTACCAGAGGCGTGACTAAAGATCGATGAGGCAGTGGGAGCGGGAGTCGATCCGCCTGATGGGCGGCAGCGCGGCGGCGCTCCGCCTGCTGGGCCTCTGGCCGGACGGCGGGCGTCGCGACGGCGGGCGTCGGGTCGGCGACGCCCCGGTGGGCGCGCTGCTGCTGGTCGCCAACGACGTCTCGCTGGGCTTGATGGGGCTCTCGTACGTGCTCATGGTGCAAGCGCGCGACCTCAAGAGCCTCAGCGAAGCCTTCTTCGACGTCGCCACCTCCATTTCCCTCACCAACAGGATCTTAATCCTGATGCGGCAGAAGGTCCTGGTGGAGGAGCTGGTGACGCTGCTGATGGAGGCCAGGAAGCGCTTTCCAGAG…	2080	MRQWERESIRLMGGSAAALRLLGLWPDGGRRDGGRRVGDAPVGALLLVANDVSLGLMGLSYVLMVQARDLKSLSEAFFDVATSISLTNRILILMRQKVLVEELVTLLMEARKRFPESVPGIRARYQALATTMFWIWQILPLFPLMLWVLEPVLVARFATHEANATADSLRTTPLPIWLPGDVRRSPTYEITYVLQAVGLVLAIGLNGFFDIIYVVFMVHIAAELDVLNQNMSTMKTEGNNNAGDRGRYDTRLKLETDYESAVVIAKSQARSLPFPSDLDVEDRMYLILVENIKHHQLIMAYIRKLEEFMRTSIFFILLTNALSICLQVLGLAVMLQEGVDLPSVLKMMLTFPAYSCETGLFCMFGQTIIDQSDRLVNSAFSCDWMNMGSRFRRSLTIFM…	440	Complete ORF	ALD51403.1	odorant receptor 107 [Locusta migratoria]	6e-75	37.28	3	PF02949	PTHR21137	146	206	4.23	5.01	0.272677	0.0777596	0.195264	noDEG
OchiOR24	Unigene9253_All	CAGCGGCGAGCGCCCAGGGGCCGGCGTTTCCTCTCCACAGCGTCCTGAGGAGTTGGGTGTGCCACACACGATGGCGCTCGACCAGAAGCGCTCCCTGGCGGGGTTCGGCCTGAACAGGTGGCTGCTGCGCTGCGTCGGCCTGTGGCCAGACGAGCGCGGCAGCCCGTGGCGGCCCACCAGGAGGCCCGTGGCGCTGCTGCTGCAGGGCTGCCTCCTGGCCGTGGTGAGCGGCGAGCTGGCGGCCATGCGGAGGTACTGGGGTGGCGAGCTCAGCCGCACCACCATCAATGCCTGCATCATCCTGCTGGTCGCCGTCGCCTTCTGCAAGGCCTCGTCCATGCTGCTCCTGCGCCGGCCCATCCTGCAGCTGATGCACACACTGCAGGACAACTCCGTTCC…	1884	MALDQKRSLAGFGLNRWLLRCVGLWPDERGSPWRPTRRPVALLLQGCLLAVVSGELAAMRRYWGGELSRTTINACIILLVAVAFCKASSMLLLRRPILQLMHTLQDNSVPQNEGEARIYSAAARHAHLLTMVLCVDYAIVAFIWDSLPLLNFLRQTPEGRYNNSEAIFSQYPIIALHPWEVQSGAAYAFTFSLQVVGGAIFTMTHLSCDTFLLSLLIHICSQIDVLCASLRQLGRRAEGAAAEAEAGAEHAGGGRKEAGGQAADQRLYGELVACVRHHQSIIGYVEVLQQVLSPVALAQFMCSMVIICLSGFGIAISNDFGALFRYSVYFSGAAIQLLIFCWYGEVLITKSERVSEAAMGCGWTEARGRRFKSSTLILMIRAQRPLALKGSKFYVVSLK…	433	Complete ORF	ALD51399.1	odorant receptor 8 [Locusta migratoria]	1e-81	65.35	6	PF02949	PTHR21137	110	183	3.56	4.95	0.510341	0.00282739	0.0150191	noDEG
OchiOR25	CL2460.Contig11_All	GAATGAATTGCAGTTGTTTCAATTGCACTCCGCAGTACACATCGCTCTCGGAGTTGGAAAAGTCGATTCAGACGAAGTATCGTAAGGTGCAGGCGGAAGAGGGACGATGAAGAGTCGGGACGAGGATAAGACGGAGATGCCCGAGTCCTGGTCTGCAAGCGGGCATTCTGTTTTGAAGCTGAATATACGACACTTGTGTTTATTTGGGGTATGGCCACTGTCGAGGTGGGACATATTCTACGTTTACAGCGTCCTCAGCTTCGTGCTTGAAATCTGGTACGTATGCGATGCTGCCACATCTTTCTACTTCCTACGGGGAGACATGGAGGAAGCGACGCTGGTTCTCATAAGTACCTTCCTCAACAGTAGCATCATCGTCAAGATGGCCCTTTTCGTGTG…	1654	MKSRDEDKTEMPESWSASGHSVLKLNIRHLCLFGVWPLSRWDIFYVYSVLSFVLEIWYVCDAATSFYFLRGDMEEATLVLISTFLNSSIIVKMALFVWHSRQYVALVRRLDALMQVQSGPCSRDSVLGELLWRSKRTAARFTKGMLLFMVSQYATWFTMPLITNGTERRLPLAQHPWDNNSHNYALFYALQCVSGVWMSQISFGIDCLFVSIMILVAAQMKILATRVVSLKIGGQEYSPKMGESISPGDKVYRDLCLCIDTHQQLLRFVKQLDVAMGPIALTQFACSVLVTCVTLFPTTYSTDISAVFLCAGFLPVPLGPVYLYCWAAHNVSEQVEEVSKAAYRCAWVEASERFKRALRILIVRAQKPLVLTAGHLYPINRAAFVSLVNASYTYYALLC…	410	Complete ORF	ALD51335.1	odorant receptor 74 [Locusta migratoria]	3e-140	63.82	6	PF02949	PTHR21137	185	146	6.91	4.56	-0.565556	0.000368992	0.00264694	noDEG
OchiOR26	Unigene20189_All	TTCTTGCTATAATCCTGCTGGCTGCCACCATTGGAGGGTCACGTTAGAGCCCGCCCTCATCTCAAGGTGCCGCTATGGGACGTCTTGCAGTGGACGCCGACTGCCTGCTGGGCCCCGGCTGCACGCTGCGGCTGCTGCTGGGCCTGTGGTGGCCGGAGGGTCGCTGGCTCTGCCTCCGAGGTCTCCTGCTGGCCACCCTTTCCCAGGGAGGCACTCTGTGGCTCACAGCAGGCGCTGTGATGAAGTTGTACATGGACAGGCCAGAGGACCCCGAAGAACTGGCGCTATGCTGCATGGTGGGGATGCTGTGCATCGGATATCTTATTAAGAACGTCACATTTATAATTGAAGGAAGTACACTACGTCGGCTAGTAAAGAGGTTGTCTGATATCAGGAAGG…	1499	MGRLAVDADCLLGPGCTLRLLLGLWWPEGRWLCLRGLLLATLSQGGTLWLTAGAVMKLYMDRPEDPEELALCCMVGMLCIGYLIKNVTFIIEGSTLRRLVKRLSDIRKEYGQEEDSKKIRQRYLGITERMYFHFQVMSVSAVMCWVCAPLVSSLFKNSDRISTQQRQYPLPIWGPQSINASPTYEILYCLQSISTLCTCQCMICTDILFFHLMLIITAELEILNNNIAEMHEGHVETAGGKEDILYVGCESNDDKTISFKNGNSTIYEKTLSTHVSFNESHHQLSKIVGHHRSVARCVSLLQSAMSVSIYILLAINMANLCFVMFLTVELFQRENSFGKVLKTVLVMPALLYQTWMYCIFGQIITDQSERLENSLFGCGWPDRDSRFKRSLRFLMLATS…	438	Complete ORF	ALD51395.1	odorant receptor 130 [Locusta migratoria]	2e-95	44.44	5	PF02949	PTHR21137	73	128	3.05	4.45	0.586176	0.00464259	0.022742	noDEG
OchiOR27	CL4905.Contig1_All	TAGCAGCGCAAGCAGCAGCTGCTGGAACAGCGCCGCTGAGTGGCCAGAGGTCCTGCCCACTGGACGGTAGGAAGCAGCGATTCCTCAGCCGGGGTGATGGCCCAATCGGAAGTCGAGTACAAGCTGCTTCTGGGCTCGGGTGCAACCCTGCGGCGTCTGATGGGCCTCTGGTGGCCACAGGGGCGGCAGGGAAGAGTCCAGTCAGCCGTGTGCGCCTCCGTGACGCTCATCTGTCTTGCTTCACTGACAACTTTCTCGACCCTCAAGCTCATCATGGACACTCCGCCAGAACTCGAAGAGATCACGCAGTGCAGTTTTGTTATTACTATATGTTTCAGTTTTTTCATCAAGGCAGCGTTCTTCATCTACAAAGGTGATACTCTGAAGGATCTTCTGAAG…	1935	MAQSEVEYKLLLGSGATLRRLMGLWWPQGRQGRVQSAVCASVTLICLASLTTFSTLKLIMDTPPELEEITQCSFVITICFSFFIKAAFFIYKGDTLKDLLKHLSDTRNIYRSHTGSERIRHSNLKLSGRVYNYMLAAVLPAVAVWVSTPLLVRVFLSTEDYSAASNRLFPAPLWFPGNMYLTPTYEILYGIQSFSLLVAALSIICIDPFFVHLMMMVATELQVLNENISLLHKLNVETLRHEDEVWTLGVKSNNHELAYSISADASCSTHPWLEDVSDEKMYQQLVKNIQHHQEILRSVPLLQSVMNVSIFILLFVNMADLCTCMFVTSVVLQRDGSVTKALKPLLTIPPLLYVTGMYCIFGQILTDQSEKLVNSIISSGWVDCNARFKYDLLFFLMAS…	439	Complete ORF	ALD51395.1	odorant receptor 130 [Locusta migratoria]	1e-150	63.4	7	PF02949	PTHR21137	95	162	2.98	4.27	0.545996	0.00281617	0.0149686	noDEG
OchiOR28	Unigene6615_All	CTCAGACGAAGTTGTGTCTCCGGCGCGGCTGCAACGCCTGTTCCGTTTTTCGAGGTCCTAACTCTGTACTGAGCCACAGAGACTGCAGACGCCTCGCAGGATGGAGGACAAGGCGCTGGCGGTGGGCGCCGGGCTGTGCCCCTGCTTCAGGGGTCTGCGCGTGCTGGGCCTCTGGACGTCGCGGCCCGCCCCCTCCGCCGGCTGCAGCCGCCAGTGCCTCGCCGTGGCCTCGCAGCTGCGAACAGCCCTGCTGGCCGTGGCGCACCTCGTGCTGCCCGTCACGCTAGCAGCCAACTTCCTCAACTGCCGCTTCGACAGCCTCGAGCTGCTAGCCACCAACATCTTCCTCTTCTCTGGCATGACGGGCGTGTCCTCAAAGGCCCTGTTGTTTGTACTGGA…	1010	MEDKALAVGAGLCPCFRGLRVLGLWTSRPAPSAGCSRQCLAVASQLRTALLAVAHLVLPVTLAANFLNCRFDSLELLATNIFLFSGMTGVSSKALLFVLDKKRFEQLLLQMQQTRIRFADNSEDQVGARERCRKFATRLYYTQHSGVRFTVLLWVTLPATASILSSDPPSTRELPLPLCLPGVDLTLSPYFELGYVIQALCLFIAVEGMSLLDSSFLALMLNIAAELEVLNNNLVSLGSKKAPKNEKCSDLARRYPYTSSGRLDSNPDSDDDSYNQLLENIKHHQHIIRRARELEALMSRPTF	303	3' lost	ALD51455.1	odorant receptor 93 [Locusta migratoria]	6e-81	62.45	0	PF02949	PTHR21137	49	78	3.26	4.24	0.446693	0.0844943	0.206624	noDEG
OchiOR29	CL270.Contig1_All	ACACAACACATCGCCTGTCTCTAGGCCGGCATGGCTCTTCACACCTCGCTGTCACTGTGCGTGCGCCTGCTGCACGTGGCGGGGCTGTCGCCGCCGGAGGCCGCCCGCCGCCGGCTGAGCCCGGCCGGGCTGCTGTACGGCGCCTACTCGCTGCTCGTGGTCTCCTTCGCCTGCCACATCGTGCTGCCGCAGGCCGCGGGCCTCGTCCACTTCCGGGGCGACATGAAGGTCGCCACGGAGAACATGTGCCTCATGTCCGCGTTCGTCACCACCAGCTACAAGCTGCTCAGCCTCCTGCTGCGGCGGCCGCGCGTCATGCGCTTCGTGGCGGCCCTGGACGCACACGTCACAGCGATGGCGGCAGAGTCCGCCGAGGCCCGCGCCGTGAAGAGCCGGCGG…	1620	MALHTSLSLCVRLLHVAGLSPPEAARRRLSPAGLLYGAYSLLVVSFACHIVLPQAAGLVHFRGDMKVATENMCLMSAFVTTSYKLLSLLLRRPRVMRFVAALDAHVTAMAAESAEARAVKSRRDLWSRRLALFMVIQSTSAAAIWSVNSLRISLTKGFCLRTLPIIAWYPYDVSVTSNYEVTFFMQFMTLITGAFSNRSSDILIITLMTQVSSLLEMLNLKFCDISKRHESPNDKHRKEDGLNNMWKSAASVFPTAFGVNRVLEPVRATASENSSEDEMYNSLSRCIEVHQEIIRYARELEFLVNDILLVDFVCCMVVTCSTLYVSTALNENFGDMLSHFGYLIAMTYPLLLYCLSAHDIIEQSERVSMSAYFTPWSQAGKKYRRAVCTVMCRAQRPLT…	437	Complete ORF	ALD51490.1	odorant receptor 29, partial [Locusta migratoria]	3e-147	65.27	4	PF02949	PTHR21137	64	132	2.46	4.2	0.820395	0.000111838	0.000917009	noDEG
OchiOR30	Unigene21727_All	CAGGGGCGTACAGTGTGGAGTTGGTCTCAAGCTCAGCCGTCAGATACAGTTACTTTAATCCAGAATGAAGAAACAAGAGGCGGGGGAACTCAAGACGTGGACAGAACCCCAACACCTGTCATGGCGTGAAAGTGGTCAATCACCTCTAATGCTGACCATCCGCGTGTTGAACTTCTTCGGGCAGTGGCCCTTGAGCGGCTCCCGGGTGTACAGAGCCTACACGACCTTCACCTTGGTCTCTACAGCGGTCACGGTGACGCTGACCATCGTCACCACTTTCCTCCTGGAGGGTCTGGAGGAGGTCACGTCCACCCTGACCACTCTCCTGCCAGTAGCTACAGGCTTCGCCAAGTCTGTGCTCCTCACATGGTACCAGCCGGACCTCACACGGCTCATGCG…	1417	MKKQEAGELKTWTEPQHLSWRESGQSPLMLTIRVLNFFGQWPLSGSRVYRAYTTFTLVSTAVTVTLTIVTTFLLEGLEEVTSTLTTLLPVATGFAKSVLLTWYQPDLTRLMRHLDTLILEQGGGSWKRARSAKAFREAHRKTLVVTLLVNLYFGVVSVYWPIVPLLEGSETKRLPFAQFPWMKTPGALQYWLTFFLQTYTTDTAGLITINVELFFLGVMNHISAQFKILGERLTDLHRSSQCKGTSFDEREPVGKRSGDIHEELSACIKTHQDFLRFAETLDDVMSPFAMAQFAAGTLSVCVVLFQTMHSQLISSKLKCAGWLPGLGLELFIYCWGGHQVAEEGEAMVLAAYSSPWYEASLRSQRDVLLMMCRAQKPPELTAGHLYKVNRAAFVSLVNM…	413	Complete ORF	ALD51369.1	odorant receptor 52 [Locusta migratoria]	2e-92	43.27	3	PF02949	PTHR21137	100	111	4.46	4.1	-0.0734393	0.711185	0.839328	noDEG
OchiOR31	CL7626.Contig2_All	AGTAGGTTTGCAGTAGCTTCAGTTTCACATCGAAGCCTGGTTGTCCGATTGGTCCTGTACGTAGGTGAAAGCTCAATGATGGAGAAAGAGCGGGAAGTGGAGATGGAAGAGCCTTTATCCTGGTCAGCGAGTGGACGATCCGTGCTGAGGCTGAACGTCCGGCAGCTGTGCCTGGCTGGGGGGTGGCCGCTGTGTGGGTCGCCACTCTTCAACGCGTACACTCTGTTCGCGTTCGCACTGGGCGCGTGGCACACGGTGGAGAGCGCGCTGTGCTGCTACTGCAGCTGGGGGAACATGGAGGAGGCCACCATGGTTCTGATGACCACCTTCAACATCGGCGGCAGCACCACCAAGCTGGCGGTGTTGGCGCTGCAGCGGCGGAAGTACAGCGCCCTGGCA…	1426	MMEKEREVEMEEPLSWSASGRSVLRLNVRQLCLAGGWPLCGSPLFNAYTLFAFALGAWHTVESALCCYCSWGNMEEATMVLMTTFNIGGSTTKLAVLALQRRKYSALARHADLLVRHGAETRALPEPVLSARKRAARLTAAMMSLIVTQYVTWFPMPLVVNRSERRLPLAQHPWDDNRHLYALSYTVQCMAAAWMTQVSVGLDCLFVTTMMLVTAQLQALASRVEGIRVELRHCSAHNTEKVSDHKYMELCLCIEIHQKILSFVKLLETTMSPIVITQFAISVLVVCVALFPATYGTNITAVLLCAGFLPVPLAQLYLYCWAAHDVTGQAETVSSAAYNCSWVDASEHFKRTLKILISYAQRPVVLTAGRFYPINRAAFVSLVNASYSYYALLGQINSR…	405	Complete ORF	ALD51467.1	odorant receptor 76 [Locusta migratoria]	4e-124	63.37	6	PF02949	PTHR21137	136	106	6.03	3.91	-0.583541	0.00168501	0.0097445	noDEG
OchiOR32	CL325.Contig3_All	TTCAAGTCTCCACCAGTCGGAACAGAGCAGAGGGGGCAACGGTCCGCAGTTACTTGACAGTAGGACCTACTTGTAGGCTGGGCACGCGTGGGGCACACGCTTCTTAGAGTGCAAGGATCCAGCAGAAACGTTTAGGGGGAAATAGGGATGCGGAGCAGTAAGAGTAAAGAGGTGTATGCGCCACTCTCGTGGGCAGACAGTGGTCGGTCCATCCTGAGCCTGAACATCCGCCACCTGTGGCTGTTCGGGCTGTGGCCACTTCACGACTTCTGGCCCTTCTACCTGTACACCGCCTGCGGACTCCTGCTGGGCTTCTGGAACGTCGTGGAGGGAGGGCTGTCCGCTTACTACTCTTGGGGCGACATGGACAACATGACGCTGGCGCTCCTCACTGGTATG…	1400	MRSSKSKEVYAPLSWADSGRSILSLNIRHLWLFGLWPLHDFWPFYLYTACGLLLGFWNVVEGGLSAYYSWGDMDNMTLALLTGMTQGCGALKMVFFTCTKDHYSALVWRLDALLAMQSEFCSGDPALAAIQRASQRRAYRVTLGTLLFMLSQCFVWYPIPLVAHAEQRRLPFAQHPWDDNRHLYALSYLAQCAAGLLMTQISYGVDCLFASAMVLVAAQLEILAGRIKGMAIQVDFSKTEKTECSGKDVARRNTDQMYRLLRICIKDHLRILRFVSHLQDTMSPIAMMQFGVSVLVICFALFQATYSNDFSSALKCTSFLPVPCTQLYLYCWAANEVTVQAEAVAVAAYSCSWVETSPRFKLALRILISRAQKPLILTAGHLYRIDREAFLALVNASYS…	410	Complete ORF	ALD51496.1	odorant receptor 75 [Locusta migratoria]	4e-127	56.55	4	PF02949	PTHR21137	49	104	2.22	3.9	0.861731	0.000348507	0.0025158	noDEG
OchiOR33	Unigene7624_All	GCGCGAGTAGCGAACTTCGTCATGTCGAAGCTCCAAGAAGCAGCGGGAATCCGCACAGACTTGGAGGTGCAGCAGCGGTTCCTGCGCGCCGCCGGCGCCTGGGCTCCGAGTGGCGGCCGCCTGGCTTACAGCTGCTACTGCGCCTTCGTCACCGCCTCGCTGGTGGCGTTCGTGGCCACGCAGGTGTCCGCCATGCTGCACTTCTGGGGCGACATCATCAGCATCACCACCAGCAGCTGCGTCACCTTCATCTACATGCTGGCCATCTTCAAGCAGCTAGTGCTCCTCAAGATGCGCCGCTCAGCTGACAAACTCCTCCAGGAGCTCGATGCATGTTTGAAGAACTATGGACGGGCATTCGGGCAAGAGAAGGCAACCATATTTGGCGAGTGTGCACGC…	1429	MSKLQEAAGIRTDLEVQQRFLRAAGAWAPSGGRLAYSCYCAFVTASLVAFVATQVSAMLHFWGDIISITTSSCVTFIYMLAIFKQLVLLKMRRSADKLLQELDACLKNYGRAFGQEKATIFGECARKGRLISRMQVYLGVSVCIAWLVLPILRVRKCSTVECRSQNGFPAIVWYPFSFTEAPVYQVTFVVVSTGLCYGSFVSTTVHGVFSALMLYVAAHLRFLNLMASHMCTTGQAGNAAASHKHRDTAEGAEESMRSCLRECVRYHIDIERLVQRLSELVGPILLGQFLSDMITISASAFVTKALRADLGLLLQYGSYVSGVIEQMLLICWCGNEILEESERLQVSVYSCDWTGGSPRFRKELRIFLCRSGRPLLVTASKFYTISRETFLLMMNASFS…	410	Complete ORF	AHB17947.1	odorant receptor 5 [Locusta migratoria]	2e-115	52.49	5	PF02949	PTHR21137	39	104	1.72	3.8	1.19104	3.02988e-06	3.42179e-05	Up
OchiOR34	Unigene16596_All	AGCGAATAAGCTCTGCAGACGGATTGACGTATGTAAGACGCTGGACAGATACGCTGCTAAATTAGGTTTTATTATCTTGCGAAATGGATATGAAGAATAGAGATACGAATGCAGATGAGGAGGAGACGGAAGTAAGGGCTTTCACGTGGAAGGACACGGCAGACTCGGTGTTCAAGTACAACATCCGGAAACTGTACCTGTGGGGGGTGTGGCCGCTGCCCGGCTCGCACTTGTTCCACATCTACACGGCCTTCGTGTTGGCAGTAGGCTTCGGCGGTCTGGTGCAGGACCTGGTGTGTGTGTACGCCAACTGGGGCGACCTGCAGGAGGTCTCTATGGCGCTGCACCATAACCTGTCCGTGGGCAGCGGCTTCGTCAAGCTCGTCTTCTTCGTGACCC…	2602	MDMKNRDTNADEEETEVRAFTWKDTADSVFKYNIRKLYLWGVWPLPGSHLFHIYTAFVLAVGFGGLVQDLVCVYANWGDLQEVSMALHHNLSVGSGFVKLVFFVTRRRKLYALVRRTDQLVSAQKELCASDEGLTSLLKTSHRRAVRMSLFVFSYITAQACLWLITPLVAYPGQRKLPFVQLPHPESISIYLHILMYFTQSFASFLVTFLGVSIDCFFAVVMIHAAVQFRILNTRIKALRPDSTAPSETSIRKPEFHDDMYNQLCHYIQTHQRLLRYVRFLDSIMNPMAMTQFTFGVMVAGVTLFQASYSPSASTIFKCATWLPTPGSQVYLYCWGAHNIMEQGAEVSMSLYSSRWVEAPSHVKRAMRVAMCCSQRPLCLTAGRVYAINKATFISLMNA…	414	Complete ORF	ALD51503.1	odorant receptor 50 [Locusta migratoria]	1e-144	60.14	6	PF02949	PTHR21137	358	198	8.14	3.79	-1.07846	5.44542e-18	1.85362e-16	Down
OchiOR35	Unigene586_All	GTCAGGAACCAACATGGACGCCGCGGAGCTTCCGGACCCGGTGGTGGACCTACGGCGGCCGTGCCTGTTCCTGCGCGCCATCGGGCTGTGGGCGCCGGCGCGCTTGCGCTGGCTGTACTCGCTGTACACGCTGTGGTCGCTGCTGCAGCTCGTGGTCAGCGTGCTGGGGCAGCTGGCAGGCCTGCAGGGCCACTGGGACAACCTGCCCACCGTCTCCACCTCCATCTGCCTCATCGTCACCTCCATCTGCACCATGTTCAAGGCGTCGTCGTTCGCGCTGCGCCGCGGCCGCGTGGACGCGCTGGTGCGCCACGTGGGCAGCAACCTGTCGCGCTTCTGCGCGCACCGGCCGCGCGCCAGAGCTGGCATCGTGCGCGGCGCGCGCGCGCGGGCGCTGCT…	1721	MDAAELPDPVVDLRRPCLFLRAIGLWAPARLRWLYSLYTLWSLLQLVVSVLGQLAGLQGHWDNLPTVSTSICLIVTSICTMFKASSFALRRGRVDALVRHVGSNLSRFCAHRPRARAGIVRGARARALLMFNTFLGMGGVALVFFYLGPAIQNVKDSRVKVQAAANETLDPLLGRNLAMLLWWPRGQPVETPAYQLTYVGVCYWLMLLYLSTSTLDTFYVTLIIYLSSQLKLLNVDFLSIAGDADEDDPVDAVKSLTKPEVVHKLSGKHQTEDHNTKVQRTQERLLECIIFHQEVIKTVDEMESILSASILVQFLASTLVICFTAFVITTAKNKQDLPTYITYLATMFYELFLYCWYGNELLAESERLQTSAYACGWPGAAPGFQRSLRVVMARLQRPV…	434	Complete ORF	ALD51393.1	odorant receptor 83 [Locusta migratoria]	0	81.34	6	PF02949	PTHR21137	67	121	2.4	3.61	0.628775	0.00338255	0.0174767	noDEG
OchiOR36	CL1230.Contig8_All	GCAGCTTGCAGACTCTCAATTCGTTACGTTAGGACGGGGGACAGCCGACTCAGACGGGTGCCATCCAGGCAGCGAAGCGCCTCCCGCAGCAGTACCCAGCATGAAGCACCCAGCTACGGACATCGCCTCCCTGCTGGGTCCCGGAGCCTCGCTGCGGCGGCTGCTGGGGCTCTGGAGCCCGACGGACGGGGGCGTCCGCTTCCTCCACAGTCTGCTCGCCGCCATGACGCTTTCCTGCACCGCGTTTATGGCGCTCTGCGTGTGTCTCAAGCTGTACGCCGACTCTCCAGGAGAGCTAGAGCTGGTCACACTGTGCTGCCTCGTCACTTCCGTCTGCGTTGGAATCTTCTGCAAGGCGGTGCTCTTCGTGGCTCAGGAAGGCACGCTGAGGCAGATCGT…	1519	MKHPATDIASLLGPGASLRRLLGLWSPTDGGVRFLHSLLAAMTLSCTAFMALCVCLKLYADSPGELELVTLCCLVTSVCVGIFCKAVLFVAQEGTLRQIVRLLADMREQFCTGDENQQTVRRYETLSKSIYFQCQTVSVLAVIGWALCPLLTHSVTHSDQEQWDAGRELPLPTWLPADVHASPTYEVLYAAHTFCVLVSVESCLIIDMFFIHMMLMVAAELEILNSNVSAMEHINVESMGKEGEGFIYGSKSNDKRLSLFNSGKAYGEPMLTENAVHKRLHQQLVKNVLHHQGILRSVSLLQSVMTVSISIQLFVNMANLCSSLFVSTVLLEKEGNVGKALNALVTIPPLVYETVNYCYYGHNVTEQSERLYYSAFKSGWVNSDARFKRSMLIFMKATM…	437	Complete ORF	ALD51396.1	odorant receptor 123 [Locusta migratoria]	3e-139	58.85	2	PF02949	PTHR21137	57	103	2.35	3.53	0.629612	0.00678736	0.0310068	noDEG
OchiOR37	Unigene7478_All	GAACAGTGCAATGATGACGGAGCGTGAAACAGGTATGAAAGCTGTCGCTGGGTGGTTTCCGAGAACGGACCTCCGCCTAGAGCTGTGGCTCTTGCGAGCGGTGGGCGCCTGGCCGCCCGGCCGGGGGCAGTCGACGTCTGCGTCGTGGCTGCTGTACGGCGGCTACCTCGCGTTCCTGCTGCTGACGCTGGTGGTGTTCGTCGCCAGCCAGGTGTTGACCATGATGCACTACTGGGGGGACATTCTCAGCGTCACCACCAGCATCTGCGTCTTCTTCATGTACGCCATGGCTATCTACAAGCTGGCGGCATTCCTCGCGATGCGTCGCGCTGCCGAACAGCTTCTGGAGGAACTCGATGGCTGCTTACGAATGTACGGGGGAAGCTACATGTCTAAGAA…	1736	MMTERETGMKAVAGWFPRTDLRLELWLLRAVGAWPPGRGQSTSASWLLYGGYLAFLLLTLVVFVASQVLTMMHYWGDILSVTTSICVFFMYAMAIYKLAAFLAMRRAAEQLLEELDGCLRMYGGSYMSKKAIIFSGCARKGRKMALMQTAMGLLVCVWWLVMPAIRVQSCESTECFMQDGLPVLVWYPFPFTESPIYEVVYVSVSLGLVYGCCIFTSLDGFFWALIIYVAGHLQFLNFMAQNMCSRESEGGPVTDSKRVSSTEPAELEEMRRRLKECVRYHNHIDRCVQQLSSLVGPVLLGQLLTDMVTISASAFIATTLTADSGWVFKYGSYLSAVIEKMFLYCWFGNDIMAESERLQLSVFSSDWTAASPRFRKELRIILCRTHRPLVLTASNIYTI…	424	Complete ORF	AHB17947.1	odorant receptor 5 [Locusta migratoria]	3e-123	54.74	5	PF02949	PTHR21137	50	115	1.77	3.4	0.977635	2.89405e-05	0.000272899	noDEG
OchiOR38	Unigene14976_All	CAGGTCCGGCGCGTATGTTAACACAGTAAATTTCCTTTCGTAAAGATGAACGACGTGGAAGAACAGCCGGGGGACGAGCTGCTGCGCCTTGTGGTGGCGGCGCTGCGCTATGGCGGCCTGTGGCGGCCCGTGGGTGCCGGCGCGCTGTACCGCCTGTACCAGGGGGCGGTGCTGTCGGTGGGGCCGCTGCTGGTGGCGGGCGTGCTGCTCAGCGCGGGCCACGTGGCGCGGGACGGCGGCGCAGCGCTCCAAGTGGCTCTGCACGCCTACTACTGCACCGTGCTGCTCTCCAACAGCGCCAAGACGGCCGTGTTCGCCACCTGCCGGACCAGGCTGGGGCAGGCGCTCACCGTCCTGGCCCGCTGCCGCAGGTCAGAGCGCAGTGAGGGGACGGAGGCA…	1667	MNDVEEQPGDELLRLVVAALRYGGLWRPVGAGALYRLYQGAVLSVGPLLVAGVLLSAGHVARDGGAALQVALHAYYCTVLLSNSAKTAVFATCRTRLGQALTVLARCRRSERSEGTEAASRRKARLMFALPQAMVVLAVATHSVVPLLGSGATICSSPEAADDGGCFSGRFPLELWYPRATHAAPLYHTVYILQLVAIYYTCHTAINVDLFFFAVTNHASYQLQQLNNALCRMGSRRTVLHSPSLQHLRRGSAESDHSPDDKRGSGPLSDMNRETVALVDQHRAMYQSLILLIRQHQTITRAIKELEPVISYALFGPILTNILNICLHMLVLTTERENMATNSKAFVGIVFNLIQNGLYCSFGETLTQQSDRLFTSIYSSGWENSCRKYKKTATIFMFQ…	440	Complete ORF	ALD51450.1	odorant receptor 91, partial [Locusta migratoria]	6e-152	73.88	4	PF02949	PTHR21137	32	109	1.19	3.37	1.54418	5.57479e-09	9.17154e-08	Up
OchiOR39	Unigene41_All	ATCGACTAGACGTCAGCTTCATATGGATGAAAAGGCGACGAGCACAGCGCAGGAAGTGCGGCTCCTGCTGGGTCCATCGGCGAGGTGGATGGAGGCGCTGGGCATGCTGCACCTGCCTGGCAGTCCGCCGCTCGGGCTGAAGGTGCTCAAGGGAGTTGTGGTGGTCGCGGTGGACCTACTGCTCTGCGCCCCCTCTGGACTCCTGCTGCTCGTGGACCCTCCGGCCGATGCGAAGATTTACAGGGAGGTCACCTACTGCTTTTTCGCAATCCTCACCTGGATGATAAGGACAGTGTTCTTCATGTTGGAGCGTACCAGACTGGAGAAACTAGTGACCATTCTGCTGGATTTGAGGAAACGGTTTCCAGATGATGGCAGTGGCATACGTAAGAAACACCA…	1465	MDEKATSTAQEVRLLLGPSARWMEALGMLHLPGSPPLGLKVLKGVVVVAVDLLLCAPSGLLLLVDPPADAKIYREVTYCFFAILTWMIRTVFFMLERTRLEKLVTILLDLRKRFPDDGSGIRKKHQKKASMICFAWLFVPVLVLPSWLLQPLLERHYVTHGNITELQLRTPMFMLLPCDDQKSPNYEIVYALQVVAVVFAAQTSILMDTYFVNVMIFLTAELDVLNANISRMHLNVAAQRQTLTVEKSVAPEYSDADRRLFKATYFYKKSKTKAEVELPVSEPVYTNGASGEYTSLVKNIRHHQRIMICINELEAAMNKSFTIVLVLSTVIICLHAFGLVELLEGDSTRASVIKRMQTFIAYLIHNGFFCFLGQSITNQSERLAHSAFRCGWADADPKF…	451	Complete ORF	ALD51413.1	odorant receptor 104 [Locusta migratoria]	6e-142	58.3	6	PF02949	PTHR21137	28	94	1.2	3.35	1.52324	8.36376e-08	1.19667e-06	Up
OchiOR40	Unigene6030_All	GTGCAGTTTGTTTTCAACATGCTTCTGATCTGCGTGTACGCATTCGTGCTCACAACGAGGAAGAGCGACTTTGGGACGCTGGCGAAGTTCGGGATGACCCTGGAGAGCTACCTGTTTGAGAACCTGCTCTACTGCTGGTTCGGCAACAACCTGATAGAGCAGAGCGAGCGGCTGCCCTTCTCGGCCTACAGCAGCGACTGGCCGGACGGCGGTCCGCGCTTCCAGCAGGCACTGCGCGTCCTGTCGCTGCGGGCGAGCCAGCCACTGCAGGTCACCGTGGGCAGCCTCTACACGCTCTCCAGGCAGACCTTCCTGCACTTGCTGAATGGATCCTATAGCCTGTTTGCAGTTCTCCACCACTTGAACAGCAAGTGAAGCACACCA	384	VQFVFNMLLICVYAFVLTTRKSDFGTLAKFGMTLESYLFENLLYCWFGNNLIEQSERLPFSAYSSDWPDGGPRFQQALRVLSLRASQPLQVTVGSLYTLSRQTFLHLLNGSYSLFAVLHHLNSK	124	5' lost	ALD51388.1	odorant receptor 85, partial [Locusta migratoria]	1e-59	91.13	0	PF02949	PTHR21137	8	17	2.21	3.34	0.863464	0.147511	0.309578	noDEG
OchiOR41	CL5177.Contig2_All	CAGGTGGTTCCTAAGAACTGTCGCTCTATGTGAACCGTTTGCACCCTTAACAAAATACTTGAAAAACTCTGCAGATTTGGGGCAGGTGCTTGACGAGTGGAGATGGCGACGCCGCCCACAGCTCGCCTGTCGGTAGCCTCTGCCGCGGCGGAGGCCAGCGACCTGGGCTACCTGCTGCGGATGCTGCACTGGACGGGCACGATGCGGCAACCGCGCGCCACCACTTGGGCCAGCTGCGCCTTCCACCTGGTGCACGCCGTGTCAGTGGCGGTCGTCGTGCTCTTCCTGAGCTCTCTGGCGGCCGCCATGTGGCGCGTAGGCAGGACAGACCTCGAGCACACCACGCTGCTCCTCTCCCACTGCAACACCGTCATCATGTGGTTGCTGCGCCTGCGCATC…	1436	MATPPTARLSVASAAAEASDLGYLLRMLHWTGTMRQPRATTWASCAFHLVHAVSVAVVVLFLSSLAAAMWRVGRTDLEHTTLLLSHCNTVIMWLLRLRIIAAHERDFHYLARQVERDFVEFLTPQDVPLLRDRGRLMRRVVQGYVWSGLVACVWWLVFPVIRNGFTVEGVPYIMVLPYDVTRPLVFVGNFLFCTAATLHVGVMTMASDSFCISLMVQLRLQLVLLSRNLISVAKEDEEIKQEKCVKDGLSTKTLDQTTHLQNRIRQNIRHHQTIIRNTELLEKCLGTTLLAQSVSISVAVCFQLYQVALSAERLVDAGKFGCYLFMMLAQLFIFCWFGDDLITESQRVSTAAYQSVTSLDGYPCSTKKSLLLVMLRAQRPLRITARGFFPFSRESFVMV…	416	Complete ORF	ALD51488.1	odorant receptor 11 [Locusta migratoria]	4e-118	68.18	6	PF02949	PTHR21137	27	89	1.19	3.24	1.49685	2.63601e-07	3.50662e-06	Up
OchiOR42	Unigene8031_All	TTAGAACACATCAGGAAATTCTCAAGTTGGTGCAGTTCCTGCAGCAGGTGATGAGCCCTGTGGCGATGGCACAGTTCCTGTGCAGCGTGGGAGCCGTCTGTGTCACACTGTACCAGGCCACCTTTAATCCGGAAGGAAACTCGAGTCTCAAGTGTCTGATGTACCTGCCCATTCCAGCGCTCCAAATATTCGTCTACTGCTGGGGCGGACACGAATTGATGGAAAACGGCCTGTCGGTGTCGCTATCAGCCTACAGCAGCCAGTGGACACGTGCTGGCAGACACGTGACCAGGGCACTACGCATGCTCATGTGCCGCGCACAGCAGCCGCTGCTTCTGCACGCGGGGAAGCTGTACCCCATCAGCAGGGACACCTTCCTCTCTTTGCTAAACGCATCGT…	451	MSPVAMAQFLCSVGAVCVTLYQATFNPEGNSSLKCLMYLPIPALQIFVYCWGGHELMENGLSVSLSAYSSQWTRAGRHVTRALRMLMCRAQQPLLLHAGKLYPISRDTFLSLLNASFSFYTVLRHMKNR	129	5' lost	ALD51374.1	odorant receptor 45 [Locusta migratoria]	2e-63	81.21	0	PF02949	PTHR21137	9	21	1.86	3.22	0.998394	0.0690153	0.179759	noDEG
OchiOR43	Unigene15178_All	TGCGAAGCGGCTGCAGGGGCTGATCATGGGGGCACCGGCAGAGACGCCCGTGAATCTACTGGGCCGTAACGCGCGTATGCTGCAACTCCTGGGGCTGTATCAGCAAAAGGATGACCACAGCAAAGTTAAGCCCGTTATCCTCTCTGCTTTCTCTCTCGTCTTTCTTCTTTACCACCCCGTCTTTGCTGCCATGAAGCTCTACATGGACCCCCCAGAAGACCTAGTGGAGTTTGCATTATGCTCATTCTCGTTTATAATCAGCGACGGTGTTTTTATAAAGACCGCAATTTTCATCGCAGACAGAGGCATGTTGCACCAGATGCTGGAGGTGTTGTCTGACTCCAGGAGGCTCTACGGTGGTGAAGAGACTAGCAAGAAGATTCGAAGCCGTTATGAAAA…	1446	MGAPAETPVNLLGRNARMLQLLGLYQQKDDHSKVKPVILSAFSLVFLLYHPVFAAMKLYMDPPEDLVEFALCSFSFIISDGVFIKTAIFIADRGMLHQMLEVLSDSRRLYGGEETSKKIRSRYENLAERVLLYMQVSTMLASVGWLGAPLVFRALLTASGESGEVPRKLPLPVWLPVDVQASPTYEVLYVIEAYCTTLTGLVTLCIDVLFIRLMLMVTAELEVLNYNVANMAKRREKVSDEGYNHGHQKMDTQDSYRADRAFPMEEISYEDGSDDQLYQQLVTNVRHHLIVLRTVDLLEAAMSKSIIILLFINMGALCSNLLVVGVLLQAGGGVTRPLTLTAMIPFLLYQTGMFCVFGQLVTDQSEKLMVSAFSCGWNESDARFRRSLLIFMAMVNRPL…	434	Complete ORF	ALD51372.1	odorant receptor 120 [Locusta migratoria]	0	87.32	6	PF02949	PTHR21137	32	87	1.39	3.15	1.21894	1.36665e-05	0.000138637	Up
OchiOR44	CL1709.Contig1_All	GTCAAGGCGTGCTGTCTACTTCTTGAGCAAGACTCTCTCCACAAGCTGGTGACACTACTGGCTGAAGCCAAAATCAAAAGCATCATCGATGTACAACACAATGAAGAGATTCGCAGCCGCTACGGACGGACGTCTCTCAAAATCTACCAATACTTGAAGGTGATGATCGCGATGTCGACGATCACCTGGCTGTTCGTGGCGGTGCCTTTCCGCGTGATTACAGCTGGATCAACAAAGATAGACTGGCCTACGCCGATCCCCATCTGGCTGCCCGTCGACATGCAGCTCTCGCCGACATACGAGCTCATCTACCTGGCCCAGATTCTGTGCACCCTGCCAGCAGCGGCGGCCATGCTGGGAACGGACACGCTCTTCTTCCACCTGACGCTGATGGTCGTC…	1107	VKACCLLLEQDSLHKLVTLLAEAKIKSIIDVQHNEEIRSRYGRTSLKIYQYLKVMIAMSTITWLFVAVPFRVITAGSTKIDWPTPIPIWLPVDMQLSPTYELIYLAQILCTLPAAAAMLGTDTLFFHLTLMVVAELQVLNDSVSALARVAPPHEEEAVFRIKDAGEQRPNYSGGINNKHNEGADSLTNLQETVTEKKNYFQLIEAIQHHEIIIKLVSSLQRLMDYSVSVVLLTNVLNVCFLIFTMSELLHHEKSSNAVLQTILSLPANLCESGAFCTFGQMIIDQSENLVHAAFSREWLEADVRLKKSLYTFMLMASRPLQIKLGGTVTLSKSTFLQVLNGSYSLINLLYHSPRSHG	357	5' lost	ALD51400.1	odorant receptor 112 [Locusta migratoria]	4e-133	68.14	1	PF02949	PTHR21137	20	64	1.19	3.13	1.45407	1.93637e-05	0.000189602	Up
OchiOR45	CL3256.Contig2_All	GTGAGGTTATCACTTTGTAAGGCTCAGCAGTCGTTTCATTCTCGTGAGGATAGACGTAGCAGTCAGTGATCGGGCCCTCCTGAAAGCGTGATCCAACACATTCACCGTGTAGGGTAGACCGGAGTCCTTCCACGATACCAAATGACGAGTGGACGCCAAAACGATGTTGAAAGTCCAATATCCTGGACGGAGAGCGGTAGCTCGGTCCTTAAGCTGAACATCCGCCATCTGTGGCTGTGTGGAGTGTGGCCACTTCCCGGTTCCTGGCTGTTCTACTCCTACGCTGCTTCTGTTCTCGGGTTGGGTGTGTGGAATGCAGTGGAAGGCCCACTAGCTGTTTATTTCTGCTGGGGTAATCTGGAGCAGACGACGATGGTATTCATGAATACCTTCACAAAC…	1274	MTSGRQNDVESPISWTESGSSVLKLNIRHLWLCGVWPLPGSWLFYSYAASVLGLGVWNAVEGPLAVYFCWGNLEQTTMVFMNTFTNGSGLVKMAFFLRNKRQFSSLARHVDALMSEQTEASSADPALGDILLTARRRAFALTLGMVLFMASQGLVWFPMPLIAHPGERILPFVQHFWDNNTNYYELSYLVQCVAGLWMAEISFGMDCLFASIMIIAAAQLEILSGRVLKLGQHSYVSDKTNQDTDKIYKELCRCVESHQKVLRFVSRLQDTMSPIAMTQFVCSVLVLCVTLFQATYNKDIITSLSSMTFLSNPCGQVYLYCWAAHNVAEKANAVSTAAYSCSWVEGNGRFKRAIRILISRAQKPLVLTAGSLYPIDR	377	3' lost	AGK25860.1	odorant receptor 4 [Locusta migratoria]	3e-130	61.84	3	PF02949	PTHR21137	64	74	3.25	3.06	-0.014546	0.952735	0.972148	noDEG
OchiOR46	CL585.Contig2_All	AAAAGGAGCAGCTGTGGTCGTCATACATTAATTAAGGTGTCGTGAGTCAGTGAGATGAAGGATAATGGAGGACGTGACTATGCAAATGATGCCAGTCCCTTGACGTGGGGCTATACAAAAAAATCACTTCTATGGCTCAATATCCGTATAATGTGGGCGTTTGGAGTGTGGCCGCTATCGGAATCCTGCTTCCGTTACGTCACTAAGTGCATATTGTTCTTTTTGGCGGTGGGCAACGCCGTCGAAAACGCTCTCGGGGCCAAGTATAATCTGGGAGACATGGAGGTAGTCACATACTCGCTGATGAATATCTTCACGACTACGGCCGGAATGGCAAAAACGTGCCACTTCTCCTTCTTACAAGACAGGTACTGTCTTCTTGTGCGCCGCGTGGACGGA…	1414	MKDNGGRDYANDASPLTWGYTKKSLLWLNIRIMWAFGVWPLSESCFRYVTKCILFFLAVGNAVENALGAKYNLGDMEVVTYSLMNIFTTTAGMAKTCHFSFLQDRYCLLVRRVDGLVLSQRDYWESDPEMLAVTRRCRKMALQVTVVAFTYLTALCLVWSMSPLVVHPEERWLPFNPLPLEPAPMPLYYEFSYAVQSASTLIYIQISFAVDFFFAVVMIIITEQLMILNVRLSQLHLYSDGGKSKITATTVLENAAVEIRDEMYDELCRCIETHKDIMRLIAFLDNVMSPIVLTQFLLSVLAGCLTLYQQTYSPDGNAVLKCSSYLPTPAILVFVYCWGAHSILEQGEAVSLAAYSCSWFDGSRRFKRALRMIMCRAQKPLIVTAGKLYPISRATFVSL…	416	Complete ORF	ALD51502.1	odorant receptor 62 [Locusta migratoria]	1e-142	62.22	2	PF02949	PTHR21137	189	82	8.45	3.04	-1.42869	4.87914e-15	1.39115e-13	Down
OchiOR47	CL2512.Contig3_All	GTAGAACAGTCCAGTCCACACAGAATCCCCTACGGTACCAGTTGTTCCAGCGCAGTTGGCCCGCGTGTGAGCTCTCCCAGCCAGATGGCAGCGCCAGACGTCGGCAGCGGCAGCAGCGGGGACCTGGAGTACCTGCTGTCTCTGCTCCACTGGACGGGCACGCTGCGGCACCCGCTGGCCGACCGCGGCAGCAGCCGCGCCTTCTACGCGCGCAACGCCGCCGTGAGCGCGTGTGTGCTGCTGTTCGTCTGCTCGCAGGCTGCCGTCATCCTGCTGGAGGGCGCGGCAGACCTCGAGCAGTTCACGCGCGCCATCTGCTTCTTCAACACCGCCGCCGCCTGGCTGCTCCGCCTCGCGCACGTCGCTGTGCGAGAGCGCCACTTCCACGCCTTGGCGCTG…	2367	MAAPDVGSGSSGDLEYLLSLLHWTGTLRHPLADRGSSRAFYARNAAVSACVLLFVCSQAAVILLEGAADLEQFTRAICFFNTAAAWLLRLAHVAVRERHFHALALQVGSDFDEFLTQRDAALLRKRGRVLRRFVLVYLWFGLSAGVGWDVVPLVRHGVCGDGLPYHMPLPYRVDRPLPFVATWLYCVSMTMHVVVATMIFDSYNVSLMAQLRQQLSVLSEHIRALADEGRRVSLSVVYSNQTEDSPTHVDSNRVRFRLRGIIRHHQAIIRNVESLEKCLGGMLLGQCLSIGASICIQLFQVAMSAESLAEVGKFGCYLSVMLAQLFVYCWFGDELITESEKVSTEVYSTVTSLQGCPASLKKSLLLMMTRAQRPLHVTAGGFFPLSRESFVNVLNVSYS…	410	Complete ORF	ALD51471.1	odorant receptor 27 [Locusta migratoria]	7e-171	76.04	3	PF02949	PTHR21137	194	141	4.88	3	-0.684361	1.53851e-05	0.000154161	noDEG
OchiOR48	CL2975.Contig3_All	ACCGAGGAGGGCGGCTGTTTTCGGGCAGACACTGCTGATGGATTGGGAGTCGCAGGCGGTGGAGCCTCTGACGTGGCAGTACGCGGCTGGGTCAGTTGTGCAGTATAACCTGCGCTGGCTCCACGCTTGTGGGGTGTGGTCGCTGTCGGGTTCGCGACTGTATCGCATCTTCACAGCCACCATCACGGCAATGAGCATGGCACACATTGCAGAAGGCATCGTTCACCTCTGCACGATGCACGGAGATCTGGAGGACTACACCGTTGCGCTGTCCTGTCTATCTATCATGGTAGTCGGTACTACCAAGGCAGCGTTCTTCTTTTTCAACGAGGCCGGCTACTGCCGTTTGGTGCGCTGGTTGGACGCTCTGGTAGAGAGCCAGAGGGAGCACGTACGGAG…	1634	MDWESQAVEPLTWQYAAGSVVQYNLRWLHACGVWSLSGSRLYRIFTATITAMSMAHIAEGIVHLCTMHGDLEDYTVALSCLSIMVVGTTKAAFFFFNEAGYCRLVRWLDALVESQREHVRSRPIHEKTFNEVQKRVLRISKTFFVYSTSLLSVWFVAPLMLPEEKRLPFQQLPTINATALPMYTYEVSYVLQVISMFFVATAHVLVDCFFIVVMFHTSAQLKILTARIADLQLPKGEMNGLCESNKDKRLQSVADNETYKQLCLCIQTHQDITRFIGYLETVMNPIAMMQLAIGVFNGCMLIFPAAYSNEMGAVLKGVACAPLVSMQLLLYCVGAHSVREQGELVSLAAYNCDWPDASVSFQRTLLLVMIRGQKPLTLTAGGIYPIQRGTFLTLLNAGY…	411	Complete ORF	ALD51487.1	odorant receptor 60 [Locusta migratoria]	9e-124	54.72	4	PF02949	PTHR21137	26	94	0.99	2.97	1.63015	1.80238e-08	2.8066e-07	Up
OchiOR49	Unigene3172_All	CGCTGGTCACCTTCATGACGGGGCCACTCGTCCAGAACGCCAAGGACCAGCAGCTGCTGGCCACGGGACTGGGAAACGTGACGCTGAACCGCCAGCTGGGCCACAACTACCCCATGCTGATGTGGTGGTTCGGCGGGCTGCCCGTGGACTCCCCTGGCTACGAGGTGGCCTACCTCGTCATGTGCTACTGGCTGGTGCTCATGTACATCTGCACCAACGTGCCGGACGCCTTCTACGTGGGGCTCATCAACTATATCTCCGCCCAGCTCAGGATGCTCCACCTCGCCCTGCCCAAGATGGCTACGCTGGACCAAGACGACCTGTTGCCAGAGAAACTCGGCCACACTTCAGGACTCGCCATCAAGGGAGGTGTACCAGTCAAAGTTGGGGCCCAGGATA…	944	LVTFMTGPLVQNAKDQQLLATGLGNVTLNRQLGHNYPMLMWWFGGLPVDSPGYEVAYLVMCYWLVLMYICTNVPDAFYVGLINYISAQLRMLHLALPKMATLDQDDLLPEKLGHTSGLAIKGGVPVKVGAQDRAYARLVDCIRFHQEIIKCVEEMESMLSLTVLIQFFTSTLVICLTAITVITTELAYLPTYAAYLATMFYELYIYCWYGGEVYLESESLQFSAYSCNWPDMDARFKKTFRICLVRMQKPIYLTACRFYKLSRETFLLLLNGSYSYFTLLLQMNQKNG	288	5' lost	ALD51477.1	odorant receptor 81, partial [Locusta migratoria]	7e-134	79.73	4	PF02949	PTHR21137	41	50	2.97	2.94	0.062305	0.836847	0.920311	noDEG
OchiOR50	Unigene5694_All	CGCGGGGAGCACCAGGAGCAGCGCATGAGGTGGCGCCTCGCTCAGTGCGTCGCCTACCACTGCCGTATCGACAGAGCTGTACAACGCTTGAGTACGTTATTTGGACCAATCCTGCTGGGGCAGTTCCTGATGGACATCGTTGCTATCAGCGCGACAGCTTTCGTCGCCATCGCTAAGAACGCAGACTCCACGTGGCTGGTCAAGTACACGTCCTACCTGTCTGCTGTGATCCAACAGCTGCTTTTCTACTGCTGGTTCGGAACTGATGTTCTCACTGAGAGTGAACGCCTGCAGACGTCAGCATACAGCAGCGACTGGGTGGATGCCTCTCCGCGGTTCCGCATGGAGCTACGCATCTTCCTCTGCCGTACGCACCGCCCGATGCGTCTCACCGCCAGC…	568	RGEHQEQRMRWRLAQCVAYHCRIDRAVQRLSTLFGPILLGQFLMDIVAISATAFVAIAKNADSTWLVKYTSYLSAVIQQLLFYCWFGTDVLTESERLQTSAYSSDWVDASPRFRMELRIFLCRTHRPMRLTASKFYTISKETFLMLMNASVSYFAVLREINAK	163	5' lost	ALD51376.1	odorant receptor 87, partial [Locusta migratoria]	4e-77	88.75	2	PF02949	PTHR21137	5	26	0.72	2.89	2.15451	0.000352307	0.00253859	Up
OchiOR51	CL4821.Contig1_All	TCATAATCGGTTGTTTTACTCTGGCGAACAATTTCAGCAGCAGTGGTTATGCTGCGGCAGGTGTACAATGCGCTGCACAATGCAGACGAGCCGTCACGCTACCTGGAGTTCAACGTGCTGATGGTACGCTTTATGGGCGTGCTGGTGGGCCGCGACCTGCCGGGGACACTGTTCACGTGGTCGTTGCTTGCACTGTTGCTCAGTCAGGGACTGGCCGGGGTGCTGGACCTGGTCGACAACCACGGCAACATCGCTGACATCACTGCCAACCTACCCGTTACCAGCATTGTATTTAGCTCTGCCTACCGCCTCTTCTTCTTCACTCTGCACCGCGATCGCTACCGAGCCATTGTGGACACTGTTGGGGCGCGTTTCGTCTCCTCTTCTAGTGGCGTGGAC…	2220	MLRQVYNALHNADEPSRYLEFNVLMVRFMGVLVGRDLPGTLFTWSLLALLLSQGLAGVLDLVDNHGNIADITANLPVTSIVFSSAYRLFFFTLHRDRYRAIVDTVGARFVSSSSGVDMAVWLRRSRIISILYFTYGSFVAGTWQLHPLISAQLTSAAMAKESNGTFEGLPRELWEFPTRAQYPFDARQPYVYTVVFILQGAAIFVSGCMILVLDMMFITITLLICGQLEILKDKLRNMRKIAMGSSQNEDIGLVGKAMQRQALERRKKILNSNIETNKKNEIFHEDLVTKKINLLLGECVEHHNMLLSLISEIEFMHWSAFMVNFCVLLIIFSFAAFEVTSGTPTSPAKVVNLAEYLLISILQMFLLCDCGDKLVDQEISVSQAAYESEWYHCSESVKR…	447	Complete ORF	ALD51405.1	odorant receptor 2 [Locusta migratoria]	0	86.77	5	PF02949	PTHR21137	129	124	3.48	2.82	-0.281031	0.120561	0.273021	noDEG
OchiOR52	Unigene2890_All	CAATATCAGTTTCAAGTGATACCACACACCATTTACGAAAGCCACGTTAACTCAATATGTCTGACAGAAATGAAGGAGTGTATTTTGGTGCTATCATAAATCTAATGCATTTCTTCAAAATATGGTCCCCAGATGGATCCAAGAGAACCATATCTTTTTCTGTTTATATCTTAGTACCAGCATATTTGTTCTTCTTTTCACTCTCATGTGTTGAAATATATCATAACTGGGGTGACATGCTTTCCACAACTGATGCTGTAAATACATTTGTTATTTACCTTGCTACTAGTCACAAATATTTTAGATTGATTTATCATGAGAATGATTTAAAGAAGTTGATGAAAACAGTTGAAAATAATTTCTCTGTACCTATTCGGCTGAATGATGCACTGCAGAATT…	1380	MSDRNEGVYFGAIINLMHFFKIWSPDGSKRTISFSVYILVPAYLFFFSLSCVEIYHNWGDMLSTTDAVNTFVIYLATSHKYFRLIYHENDLKKLMKTVENNFSVPIRLNDALQNSIIKSYVQEVKKLTILWTTLCFTTLCGFMILPLADGLFHYYTANATTEIEWKLPYRTWTPFNDYSTIVTVPLYIYHMFMGFVLIAEIPAFDTIYFSLINHACAQLKILQNSLRNILMISAQNTHSNERNSVTFDTMFDDDYVVEENTDLSSLPQAHSMNGALNPPSRNYNSLNHIRASELENKIQHNVGELVNHHERILEFVDGVEAIVNAVFLTQFLCSATLFCLTGFQLTLILKEQQLARFLNMMELLGAAIFEMGMFCYYANRVMDEGINVGKAAYDSQWYY…	441	3' lost	ALD51409.1	odorant receptor 1 [Locusta migratoria]	0	85.14	6	PF02949	PTHR21137	46	73	2.12	2.78	0.442263	0.0981901	0.232055	noDEG
OchiOR53	CL4905.Contig5_All	CGTGGCGGTAGCAGCGCAAGCAGCAGCTGCTGGAACAGCGCCGCTGAGTGGCCAGAGGTCCTGCCCACTGGACGGTAGGAAGCAGCGATTCCTGGGCCGGTGTGATGGCCCAGTCGGATGGCGAGTACAAGCTGCTTCTGGGCTCGGGTGCAACCCTGCGGCGTCTGATGGGCCTCTGGTGGCCACAGGGGCGGCAGGGAAGAGTCCAGTCAGCCGTGTGCGCCTCCGTGACGCTCATCTGTCTTGCTTCACTGACAACTTTCTCGACCCTCAAGCTCATCATGGACACTCCGCCAGAACTCGAAGAGATCACGCAGTGCAGTTTTGTTATTACTATATGTTTCAGTTTTTTCATCAAGGCAGCGTTCTTCATCTACAAAGGTGATACTCTGAAGGATC…	1456	MAQSDGEYKLLLGSGATLRRLMGLWWPQGRQGRVQSAVCASVTLICLASLTTFSTLKLIMDTPPELEEITQCSFVITICFSFFIKAAFFIYKGDTLKDLLKHLSDTRKIYRSHTGSERIRHSNLKLSGRVYNYMLAAVLPAVAVWVSTPLLVRVFLSTEDYSAASNRLFPAPLWFPGNMYLTPTYEILYGIQSFSLLVAALSIICIDPFFVHLMMMVATELQVLNENISLLHKLNVETLRHEDEVWTLGVKSNNHELAYSISADASCSTHPWLEDVSDEKMYQLLVKNIQHHQEILRSVPLLQSVMNVSIFILLFVNMADLCTCMFVTSVVLQRDGNILKAMKPLLTIPPLTIETAMYCIFGQMLSDQSERLVNSAASCGWADCDTRFKRGLLVLMTVA…	438	Complete ORF	ALD51395.1	odorant receptor 130 [Locusta migratoria]	1e-144	61.21	6	PF02949	PTHR21137	30	76	1.32	2.74	1.11704	0.000149772	0.00118916	Up
OchiOR54	CL1524.Contig1_All	TTCCAGACATAAATTTCGATCAAATAAAGCATAGACACTGTGACTAAAATACAGTGTATTCCTTCAGAGCGATGACTACTCCAAAACGACAGGAAACTTCTCATCCGAGGAAGATGACAGACGAGGAGCTGGACTCGGTGGCGCCATGCGCGGCGCGCATCGGCCTGCTGGGCTACTGGCGGAGGAGCGCCTCCAGAGAGGGCGCCCATAGGTACCTGCGGGGCTGGCTCTCCTGTGCGCTGGTCTCCTGCATCTCGCTGAGCGCCGCCGAGAAGCTCATCTTGGACACGCCCTCTGATCTGGCTGAGCTCACTATGACCGCCTTCGAACTGACTGTGCCGCTTACTGTAGTGTCCAAGGGAGTGTGCTTCATACTGCAGCGAGACACCATTCACAGCC…	1915	MTTPKRQETSHPRKMTDEELDSVAPCAARIGLLGYWRRSASREGAHRYLRGWLSCALVSCISLSAAEKLILDTPSDLAELTMTAFELTVPLTVVSKGVCFILQRDTIHSLIELLVDMRRRYAERDGIAGRRSACLQYVLTVQRVLLIMAVFIMGAWAMAPVLPHVLPFASSNATSVTWVTPLPLWLPLDTQRSPLYECLYLLQTVFLVTSLSSASALDAFFCNITLMIAAELQVLNDNISSLMGKQPVLEKAGQKLPAIEVFADDEATVQRFPVGDTEHPGLSTTGRRTPRNQTYQRLVENIRHHQDILRCASLLETSMKYSVPFQLLNSITSMCFVLFVCSASLQQGGGLSSALKTILCIPYLFCETGIYCIYGQEILDQSEELVHSAVNYEYIEAGA…	453	5' lost	ALD51437.1	odorant receptor 113, partial [Locusta migratoria]	7e-101	67.25	1	PF02949	PTHR21137	78	98	2.48	2.59	0.105309	0.628621	0.783216	noDEG
OchiOR55	Unigene144_All	CCAGAAGCAAGCAGCCATGCCGCAGGACTCGCCGCGCACGGACCTGGGCCAGCAGACGCGGCTGCTGCGGGCCGCCGGCCTCTGGACGCCGCAGCCGCGGGCCGGGGTTCGCGCCCCGCTGTACGCGGCGCATGCGGCCTGTGTGGTGGGCTCGCTGCTCTTCCTGGTGGGTAGCCAGCTGTCCGCCATGCTGCACTTCTGGGGCGACATCCTCAGCGCCACCAACAACGCCTGCGTCATCTCCAGCTACTCCATGGCCATCTTCAAGTTCTTCGCCTTCCGCATGATGCGGGGCTCCATTGAGCAACTTATTCGCGACCTCGACAGATGCCTGCAAGTGTACGGAGAGGAGTACGCGGCGCAGAAGGCGGCCATCTTCGACGCGTGCGCGCGCCAGGG…	1033	MPQDSPRTDLGQQTRLLRAAGLWTPQPRAGVRAPLYAAHAACVVGSLLFLVGSQLSAMLHFWGDILSATNNACVISSYSMAIFKFFAFRMMRGSIEQLIRDLDRCLQVYGEEYAAQKAAIFDACARQGRLVSRLQVSLGVGVYLSWALLPAIRARACDTTDCRVHSGFPALVWYSFSFTEPPLYEVIYAIISIGLFYGCIIFTSQDGFFWSLIIYVGGHLRFLNLMVSNMSSGERDAKSARVSPELEEKMCRRLKECVDYHNDIDRCVQRLSSLLGPVMLGQFLTDIVTISASAFVATMLKADSGWLLKYGSYLSGTIEHMFLFCWFGDDILRESERLQ	339	3' lost	ALD51441.1	odorant receptor 89, partial [Locusta migratoria]	1e-144	83.44	6	PF02949	PTHR21137	37	48	2.4	2.54	0.15151	0.629011	0.783544	noDEG
OchiOR56	CL3784.Contig2_All	ATTTACAGGAGCCATACAGGCAGCGAGAGAATTCGCCACTCAAACCTAAAGCTGTCAGGGCGAGTCTACAACTACATGCTGGCGGCGGTGCTCCCGGCGGTCGCTGTCTGGGTGTCCACTCCGTTACTTGTCCGTGTTTTCCTCAGTACCGAGGACTATTCGGCTGCCTCAAACCGCCTGTTCCCTGCACCACTATGGTTTCCAGGAAACATGTATCTCACACCCACGTATGAAATACTTTATGGTATTCAGTCTTTTAGTTTACTAGTAGCCGCTCTGTCTATAATTTGCATAGACCCTTTCTTCGTCCACTTAATGATGATGGTTGCTACTGAGCTACAAGTGTTAAATGAAAACATATCACTTCTGCACAAATTAAATGTGGAAACGCTAAGACAC…	1150	IYRSHTGSERIRHSNLKLSGRVYNYMLAAVLPAVAVWVSTPLLVRVFLSTEDYSAASNRLFPAPLWFPGNMYLTPTYEILYGIQSFSLLVAALSIICIDPFFVHLMMMVATELQVLNENISLLHKLNVETLRHEDEVWTLGVKSNNHELAYSISADASCSTHPWLEDVSDEKMYQQLVKNIQHHQVIIRSVHLLQSVMNVSIFILLFFNMAALCCYMYVAIALFQRNGIVPNTLKLMMTCASFMYQTAIYCIFGQILTDQSESLRYSAFNCGWVEGNARFKQDLQIFLMGAERPLEVTVGKMNKLSKDMLVQVLKGSYGLLNVLYNFHTVN	331	5' lost	ALD51395.1	odorant receptor 130 [Locusta migratoria]	1e-98	58.54	4	PF02949	PTHR21137	14	54	0.82	2.53	1.72353	9.03e-06	9.43397e-05	Up
OchiOR57	Unigene2468_All	GAAGGGAGGCGTCCCCATCTCACGATTGTACTCAGCATGCTAACAAAGGAGAGACGCGACCAGCAGCGTAGGGAGGGACTACTCATTGATGAGGCGGCGACTTTTACCTGGAGCGAGACGTCGCGCTCCCTGCTGAAGGTGAACATCAGAGTGCTGTTCTTCGGCGGGGCGTGGCCGCTGTCAGAGACGCTGCTGTCCTACGCCTACATCGCCGCCGTAGCCATGGCGAGCCTCGCCAATATTGCAGAGGCCGCTGTGGGCCTCGCCCTGGGACCGGCCAGCCTGGACGAGGTGACTCTGGTGCTGCCCAACACGCTGACGACGGCGTGCGGCGTCGTGAAGCTGGCCTTCTTCCTGAGGGACCGCAGGCGCTACTTCGCTCTGGTGCGGCGCGCGGAC…	1609	MLTKERRDQQRREGLLIDEAATFTWSETSRSLLKVNIRVLFFGGAWPLSETLLSYAYIAAVAMASLANIAEAAVGLALGPASLDEVTLVLPNTLTTACGVVKLAFFLRDRRRYFALVRRADRLVAPQEQLSGEAEAFLRGVRRRVRAFAVFVVAITCVQAVVWFPMPLIVHPGERRLPFAQIPWSNDTQVPVYELSYAVQCLSSFTIAIITLGFDSLFMGIMEFVGAELHLLTLRMSRVRLDEGDHNREKTGGSGFAAQTAKGGDRDYRELCLCVERHQEIIRFTRFLEEMMSPIAMTQFIFSVLSVCLLMFQATFSDDFSAVIRCVAFLPFPGGQMYIYCWAAHRITEKAEALSMAAYSCNWVEASQQFKRALRIVIIRAQQPVVITAGRLYPVNRTT…	420	Complete ORF	ALD51497.1	odorant receptor 64 [Locusta migratoria]	4e-102	48.51	6	PF02949	PTHR21137	38	78	1.47	2.51	0.813475	0.00319556	0.0167319	noDEG
OchiOR58	CL1642.Contig5_All	GAGATCTGCAGGCAGCAGGTGCAGTCATGGGGCTCCCTAGTTTGGATCGAGAGTTGCTGGCGTGCCCTCCTGGATCGGCTTTCCTGCGCTTCGTGGGGATCTGGCAGCCACAGGAGGCGGCCTTCCGCTACCTGCCTGGTGCTCGCGGCTGCCTGTCACTCGTCTCCATTGCTTTCGTCGCAGTCGGCGCGGCTCTGAAGCTGTTCCTGGACCCTCCGCAAAATCTAGAAGAACTCGCCCTTTTCTTTTTTGTCGCCGTCATCTGTAGCGAGTTGTGGATCAGGGCAGTCCTGTTTATCGTGCACGGCTCCACGCTGTGGCAGCTTGTGCAGTTATTGGTTGACATCAGGGCGGAGCACAACCAAGGAGAGGGCAACGAATGCACCAGACGCCGTTACC…	1271	MGLPSLDRELLACPPGSAFLRFVGIWQPQEAAFRYLPGARGCLSLVSIAFVAVGAALKLFLDPPQNLEELALFFFVAVICSELWIRAVLFIVHGSTLWQLVQLLVDIRAEHNQGEGNECTRRRYQRTVKRVSWFLQVGMLGSLVYWLSSPLVSRVLLGFDHSSRQLPLPVWIPADVHASPTYETLYTAQCIGLTIVTASTACIDIFFIHLMQLIGAEFEVLNENFSAMQKDYEQYAETKNHGAIYECISDEQIHRQLTKNIQHHQMLLRSISLLQTAMSAPIFILLFINMANLCSNLFIAAVLLQRDRNFSKALKALMSIPPLLYETGLYCTFGHVLTDQSENLVQSAFSCGWADCDVRFRRSLLLFMTATVQPLELTMGGMTKLSKQTLLQVLNGTYG…	411	Complete ORF	ALD51396.1	odorant receptor 123 [Locusta migratoria]	1e-99	45.87	5	PF02949	PTHR21137	43	59	2.19	2.46	0.232379	0.417891	0.615058	noDEG
OchiOR59	Unigene30058_All	CCATGACTGAGGGTCAGAGCCTCTCTGAAGTAGATCCCAAATATCATGGTGCAGTAACCCATTTCGAGAGAAGCCTCTTGCAGCAGCAGATGTATTGCGATTTGGCAAACAACATTCGGCATCATCAGTTGATTATAAAGTGTGTCAGAGAACTGGAGGCTATAATGAACCTGCCTATCTTCGTTCTTTTGTTTCTACACATGGTGAACATCTGTGCACAGATCTTCGTCACTTCTTTGTTGCTGCAGAAGGAGAACGATTCAACAACGATGTTCAAGGTGCTGTTCACGCTGCCGATATACCTGTATGAGACTGGGCTGTACTGCGTCTTTGGTCAAATCATTATCGACCAGAGCGACCGCCTGCCCAGCTCGGCCTACAGCGGCGCCTGGCTGCGGG…	559	MTEGQSLSEVDPKYHGAVTHFERSLLQQQMYCDLANNIRHHQLIIKCVRELEAIMNLPIFVLLFLHMVNICAQIFVTSLLLQKENDSTTMFKVLFTLPIYLYETGLYCVFGQIIIDQSDRLPSSAYSGAWLRGDARFRRALLLLTSHAARPLSLTVGKTYTLSRHTFLQILNGSYSLFNMLYQVQ	185	5' lost,3' lost	ALD51475.1	odorant receptor 98, partial [Locusta migratoria]	7e-82	89.94	2	PF02949	PTHR21137	6	21	0.88	2.38	1.58336	0.0091687	0.0391242	noDEG
OchiOR60	Unigene11827_All	CGGAGATTGAGACGGGAGCTCAGCAGGCAGCGGAGATGCCACTGTAAAGTCACGTAGAGTCCAGCGCCTGCTAGTCGCCAGCGTACAAAGCTGAAGCTCAGCCCGGCATGGAGGGCGAGGACGCGCTGCTGGGCCCGGGAGCGACGGCGCTCAAGCTGCTGGGCCTGTGGCCGCTGCGAGGCCGGGGCGGCCGCCTCCTCAGCGCGCTGCTCGCTGCCGGCACGTTGGTATCCCTGGCGCTGCTGGTGGTCTGCGTGATTCTCAAGCTGTACGCCGACCCCCCAGTGGAGCTGGAGGAGATCACTCTCTGCGGCCTCGTCATCTCCTTGTGCGTCGGATTCATCTTGAAGGCGGGGCTCTTCCTGGCACAGGCAGGCACACTGCGGCAGATGTTACGAC…	1385	MEGEDALLGPGATALKLLGLWPLRGRGGRLLSALLAAGTLVSLALLVVCVILKLYADPPVELEEITLCGLVISLCVGFILKAGLFLAQAGTLRQMLRLLADTMEQFQTGDSNKLTRHRYQKLSKNIYFYFQIMAVPAVIGWVLSPVVSNSIASSDHEQMVAHRTFPVPVWLPEDFYMSPTYEILYAVNAFWALLTTECGLVVDIFFVHVMLMIAAEFEVLNDNLSAMGHLQMMRTDTETFISRYEMNDSRLAVLNTGQSLGEQRIAENAAYEWIHRQLVKNVLHHQAILRSVSLLQTAMDVSIFIFLFIDMANLCCSIFVAVVLFQREGNLGKSLNALLTIPALLYETVVYCIYAHIMTDQSERLVYSAYKCAWVNSDARFKRSLIIFMTATMHPTVIT…	426	3' lost	ALD51396.1	odorant receptor 123 [Locusta migratoria]	1e-146	61.59	7	PF02949	PTHR21137	46	62	2.11	2.35	0.206635	0.458252	0.651735	noDEG
OchiOR61	CL1651.Contig2_All	CATCGGGCAGCTGCAGGGCCTCTACTACTTCTGGGGCGACGCCAGCCTCATCATCCAGGACGTCTGCCTCCTGATCACCACCATCTCGGGCATCTTCAAGTTCTTCGTCTTCGTAATCAGGCAAGAGGACGTATTCGCGATCGTGCGCACCATCGACGACCGCAGGCGGGAGCAGGCGAAGCTGGGCAACCCGCGCATCACGGCCGTGCTGGACGCGTCCTACCGGTCTGGACGCACCATCACCATCTGGATGGCGGGCATCGGCGGCACCGGACCCGTTGTCTGGGCCGTCTCGCCGGCCATCTTGCGAGTCCTAGGAGTCGGCCCTCCGGAGCGCGAACTGCCCGCCATGGCGCGCTACACCAGCAGGGACACGGAGAGCCCCATCTTTGAGCTGCT…	1192	MQGLYYFWGDASLIIQDVCLLITTISGIFKFFVFVIRQEDVFAIVRTIDDRRREQAKLGNPRITAVLDASYRSGRTITIWMAGIGGTGPVVWAVSPAILRVLGVGPPERELPAMARYTSRDTESPIFELLNILQYFSMQYSYYAAMCLDLFFSCLIIHVAAQLEVLNVRLSQIREDLYHSGQSRHPRDGTSNEDTEEHSAFIQLCECVEHHKDAIKLVDDLESLVNPIILSQFMGATIIICVTLFLITTNKQHIAALVRLQAYLAVVTYEIFMYCWFGDDVMYQNSRLVNSVYTCGWPGAPQKLQKALIIILLRAQRPLGLTAGKFYHVSRETFVSLMKASYSYYALLNQMNN	353	5' lost	ALD51414.1	odorant receptor 33 [Locusta migratoria]	1e-160	76.4	5	PF02949	PTHR21137	43	52	2.36	2.33	0.0501757	0.86542	0.933286	noDEG
OchiOR62	Unigene643_All	GACGACCTCCTGGGCTATTCTATAGCTTACTTCATCCAGTGTCACGCCATCTTCTACTGGAATTTCATTAGCGTCGGCCTCGACGTGTTCTTCGCCACGGCTATGCTCCACGCCGCTGCACAGTTGAAGATACTGAGCCACCGTCTCTCCAGACTCGGAAAAGGGGCTGGTTATCATCACGAGCAGAGGTCCCACTGGGATGATCTGCAGGGAGACGCAGCACCTGTCAGGCTGATAGTGCCACATCAAGAAACGAATGATATGTACTCACAATTACGAAGCTGCATCATAAACCACCAGGAGATTTTGAGGCTGGTGCTGTTCCTGGAGACGGTGATGGGCCCCGTGGCGTTCATCCAGTTCCTGTGCAGCGTCGTCGCGGCCTGCGTGGCGCTCTTC…	772	DDLLGYSIAYFIQCHAIFYWNFISVGLDVFFATAMLHAAAQLKILSHRLSRLGKGAGYHHEQRSHWDDLQGDAAPVRLIVPHQETNDMYSQLRSCIINHQEILRLVLFLETVMGPVAFIQFLCSVVAACVALFQATFNTEGNGVLKCTMYLPTPAFQIFIYCWCGHEIMEEGLSVSLAAYSSGWVGAAQRVSRLLRVVMCRAHRPLQLTAGKLYPVNRLTFVSLINASYTFYALLRQMRDR	241	5' lost	ALD51408.1	odorant receptor 41 [Locusta migratoria]	4e-107	80.49	2	PF02949	PTHR21137	5	31	0.47	2.32	2.40827	2.99442e-05	0.000281233	Up
OchiOR63	Unigene12983_All	CCTGAAAGAGCCTCCCGCTTACTGGTTCCTCTACGTCCACCAGTGTATGGCCACTTTCTTTTTCTGTTCCATAGATATGCACACAGACTGCTTTTTCGCCACCATTATGGCCCACATCTCGATGCAGTTCAGGATTCTGGCTTCGCGCTTGGCTGGGCTGCAACTCCGAGAAAACAAGCAAAAGTCAAAACTTTATTTAGAACTCGATGCTCTGTCCACAGTTCATGACGACATGTACAATGAGCTGTGTTTATGCATCGACACCCACAAAGAGCTCATCAGGTTGGTGGGCCTGCTGGAATCGCTGATGAGTCCGGTGGCGATGCTGCAGTTCCTGGTGGGGGCCGTGTCCTCCTGCGTGGTGCTCTTCTCAGCCACCTACAGCCCAGACAGCAGCTC…	818	MKEPPAYWFLYVHQCMATFFFCSIDMHTDCFFATIMAHISMQFRILASRLAGLQLRENKQKSKLYLELDALSTVHDDMYNELCLCIDTHKELIRLVGLLESLMSPVAMLQFLVGAVSSCVVLFSATYSPDSSSAMKCWGSLPLLLTQLFLYCSGAQHILDQSEQVSLAAYDCAWCESSSEVRRALQLVMSRAQRPLALTAGSLYPVKRATFLSLVQATYSYYTLLQNLDN	230	5' lost	ALD51416.1	odorant receptor 54, partial [Locusta migratoria]	1e-72	82.82	0	PF02949	PTHR21137	15	33	1.3	2.31	0.913504	0.0343037	0.108031	noDEG
OchiOR64	Unigene15257_All	GCCAATGCTGATGTGGTGGTACAACGGGCAGCCAGAGCAGACGCCCTCCTACCAGCTGACCTACATGCTCATGTGCTACTGGCTGATGCTCATCTACTTGGCGTGCGACGTGCAGGACGCCTTCTACGTGACGCTCATCATCTACCTGTCGGCGCAACTCACCATGCTCAACGCCGCGCTCGCCAACTCTCTGAACCTCGGAAACGGTGAAGATGGCCGCACGTCTACTGGGAGGAGGTCACTCCCAACCAGAGGCTGGCGTCGTGACGTGGAGCGCGTGCTGCCGGACAAGCACGGGGACCGTGACAGGCTTGTCGAGTGCATTAAATTCCACCAGGAAATTATAAAGTCTGCATCTGAGATGGAGTCCATTCTCAGCGTATCTGTACTCATGCAGTT…	805	MLMWWYNGQPEQTPSYQLTYMLMCYWLMLIYLACDVQDAFYVTLIIYLSAQLTMLNAALANSLNLGNGEDGRTSTGRRSLPTRGWRRDVERVLPDKHGDRDRLVECIKFHQEIIKSASEMESILSVSVLMQFMTSTLVICFTAFTVVTAETAYLHTYITYLATMFYQLFLYCWYGGEMVLESEKLQLSAYSCAWPDADPVLKRCLRIMMSRLQSPVKLTACKLYGLTRETFLLLMNGSYSYFALLHRMNQAPS	253	5' lost	ALD51393.1	odorant receptor 83 [Locusta migratoria]	1e-77	58.2	3	PF02949	PTHR21137	19	31	1.68	2.21	0.48227	0.243209	0.43325	noDEG
OchiOR65	Unigene18254_All	ATGCCGCTGCTGCTGGAGCGAGACAGGTCGCTGCCCACAATAGCCTGGTACCCCTACGACGAGACAGTAACTCCGTTCTTTGAGCTCACGTACTTACTACAAGGGATAAGTACATTTTACTGCTGTATTACCAATGTTGGCCTCAACGTTTTTCTCGTCTCACTGATCATATATGTGTCAGATGAGCTACAAAATTTGAACTGCCGTATTTCCAGCATTGACTACTCTACAGGCTACAACTGCAGCTGCAGTGAAGACAAGCAGCATCGCTCCTCTAAGACTGCCCTCGACGACGATGGTGACAGAAATGTTGATACATACAAGAAACGCTCAAATCGCCCGAGACAAAGGGCACAGTTCTGTTGTGTTGTCAAAGCGCAAGACTACCTCTGCAGGTGT…	449	MPLLLERDRSLPTIAWYPYDETVTPFFELTYLLQGISTFYCCITNVGLNVFLVSLIIYVSDELQNLNCRISSIDYSTGYNCSCSEDKQHRSSKTALDDDGDRNVDTYKKRSNRPRQRAQFCCVVKAQDYLCRCLQYHQELIRTVKKLET	149	5' lost，3' lost	ALD51442.1	odorant receptor 28, partial [Locusta migratoria]	9e-57	75.16	1	PF02949	PTHR21137	15	14	3.12	2.16	-0.323535	0.545203	0.721651	noDEG
OchiOR66	CL6356.Contig1_All	GTCCGTTCCTGTCATTTGTGACACTGCCGGTGGGGTGGAGGTTTAAGATAATAAAGGGTCTCCTCAGGCGCGGCACATTCCGTTGTGAGTTTGTTTCATACTTGCATTTTAGTTGTCTACTAATGGGCGGGGATACGCAGGAGACGGAGCCGTTGACATGGCAATACACGGCGCACTCGGTACTCAAGTACGACCTGCGCATCCTCCACTTTCTTTGCTTGTGGCCACTCCCAGGATCGTTGATGTTCCGAACATTGACGGGAGTCGTTATCGCGCTGTGCGTGGGGAACTTCGTGGAAGCGGTGGTCAGCCTGTGCACCCTGAGTGGCGACTTGGAGGCTTACACGTTGGCGCTGTCCAACGTCTCGGTCGTCATAATTGGCGTCGTCAAAGTAGCTT…	1506	MGGDTQETEPLTWQYTAHSVLKYDLRILHFLCLWPLPGSLMFRTLTGVVIALCVGNFVEAVVSLCTLSGDLEAYTLALSNVSVVIIGVVKVAFFLRHERKYCHLVRWLDALVAAESESSRGRPLLGTIFAATRKRAARIAWGLLLYNCFLLVIWLTMPLTTPPEARILPMQQLPFTDANAHPLYEISYAMQGLSIVFIGLINVHIDCFFTVAMIHTAALLGSLASRLGDLQVHNTSSSSKGYEQGKRPLSAHDMFSELCLCIRTHQEIIRFVQHLESVMNPIAMMQLALGVFDGCMLIFPAAYSPETGAWLKCVITGPTVAVQLLLYCLGAHSVREQGERVSVAAYSCGWPDASARFRKAVQLVITRAQQPLSLTAGGVYPIQRATFLSLLNAGYSYYA…	407	Complete ORF	ALD51487.1	odorant receptor 60 [Locusta migratoria]	8e-174	76.79	4	PF02949	PTHR21137	47	62	1.96	2.13	0.175608	0.526241	0.708445	noDEG
OchiOR67	CL1937.Contig2_All	CCTCAGTCCCAGTACAGTTAAACTAGCCGACTGCAGCTGCAGTCAGCGGAAGTAGCATCTCTCGAAATGGTGGCTCAGGAAACCCTCGGCAGGGAGGCACTTGGAGAAACGAGAGAACCCAGAGACAACGTCTTAGGGCGCAATGTGAAGATTCTGCGATTCGCTGGGGTGTGGCGACCTGCTTCTCGAAGCGGTTGGCGGCCCTGCCTGTTCCCGCTGTACTTCGCCTCAGTGTGTGGCAGCCTGCTCAACATCATCACGCTGGACATGGCGAGGAGCTGGCTGCTGTGGGGGGACATGACCGAGGTCACGTTCGCCCTCGTGTCCGCCATGACCAACCTCAACGGAGTGGTCAAGATGCTGCACTACATCAGACACAGTGAGGCCTACAGCCGGCTG…	1433	MVAQETLGREALGETREPRDNVLGRNVKILRFAGVWRPASRSGWRPCLFPLYFASVCGSLLNIITLDMARSWLLWGDMTEVTFALVSAMTNLNGVVKMLHYIRHSEAYSRLVSDLSGLVALQRPHCESNAARMEAFDQACRTAARLTVGCLAYMGVLGQMWCVVPLASQDPPDSRESPLPLVSLPGLRRENRGWYTFAFLVEGHAVLYWNFASLGMDMFFSSAMIHVTGQLNILNIRLAQLRQEGSTEDSYNGFNRSRNSPQQGSANGSARMYIELCECVKHHQAILRYLEFLESVMSPVALTQFLCSVVAVCVTLYQITFNPEGSGVIKCAMFLPIPALQIFVYCWSAHDIMEAGLSVSLAAYSCAWVGVDRRVARALRIVMCRAQRPLLLTAGKVYP…	431	Complete ORF	ALD51385.1	odorant receptor 46 [Locusta migratoria]	0	78.27	0	PF02949	PTHR21137	68	56	2.99	2.06	-0.504107	0.0517582	0.148188	noDEG
OchiOR68	CL6986.Contig1_All	GGGGAGGTCTCGTCCTGTTGGCGTCAGTGGTGGTCACACTCCGGCAGTGTAGGGCAGAGAGAAGGAAGGGGTGCTGTATCTTCTGAGTTTGCTCACTGTTCGTCATGGATTGGGACTCTCAGGAATCGCAGTCACTGACGTGGCAGTACACTGCGGACTCCGTTCTCAGGTACAACGTGCGTTTCCTGCACGTGTGTGGCCTTTGGCCGCTGTACGGGTCCCGATTGTTTCGCGTCTTTATCGTCGCCACCCTCATATTGTGCTTTGCTCACATTGCCGAAGCCGGCATCAACCTATGCACACTACGCGGGGACCTGGAAGACTACACACTGGCGCTATCCAACGTGACAGCTGTCATTGTCGGAGTGCTCAAGGCGGCCATCTTCCTCCGTAAGGAGG…	1222	MDWDSQESQSLTWQYTADSVLRYNVRFLHVCGLWPLYGSRLFRVFIVATLILCFAHIAEAGINLCTLRGDLEDYTLALSNVTAVIVGVLKAAIFLRKEDGLCLLVRWLDALVERQRDDLGDQPSLQATFTEARKRAGRISKGLDTYNLSLLVLWILVPVMAPSEDRRLPFQQVPMANTTTFPLYELSYAVQSISVILICLISVHLDCFFIAVMILTGAQLQIVATRIDDLHLRNVAEKKDLTIGDTYKELRLCIQTHQNITRFIEHLERVMNPIAMLQLAFGVFTGCMLIFPAAYSSERGSLVKVVVTMPAVSVQLLLYCLEAHRVREQGELVSLAAYSCGWPDCDVSLQRTLLLVMTRAQKPLRLTAGGVY	372	3' lost	ALD51476.1	odorant receptor 57 [Locusta migratoria]	1e-118	56.95	4	PF02949	PTHR21137	65	47	3.44	2.05	-0.691778	0.0115293	0.0474827	noDEG
OchiOR69	Unigene82_All	GTGGTGCTGCCGGCTGTGATCTCAGAACAGGGCTTTTGCCACGTAAAGTACCGCTTGGACACACCCGTCTTAGCTGTTGTCTATCCATGGGCTGGGACTCGCACGAAGGGCAACCACTGACGTGGCAGTACACGCGGGACTCAGTCCTCAAGTACGACGTGCGCATTCTGCACATTATTGGCGTGTGGCCCCTGACAGGTTCGCGTTGGTATCGATGCCTCGTAACTGTCATCATCACGCTCTGTTTGGGGCACTTCGTCGAGGCCGTGATCAACCTCTGCACGCTACGCGGAGATCTTGAGGACTTCACCCTGGCTCTGTCCAACGTGTCGGTCGTCATCGTGGGAGGCCTCAAAGTGAGCTTCTTCTTGCGGCACGAAAACGGCTACTGCCGGCTGG…	1295	MGWDSHEGQPLTWQYTRDSVLKYDVRILHIIGVWPLTGSRWYRCLVTVIITLCLGHFVEAVINLCTLRGDLEDFTLALSNVSVVIVGGLKVSFFLRHENGYCRLVRWLDALISSQREYVKGRPQLEGVSVGAQSLAVRITRGFCMYNASVVLAWVLLPLTAPPEAKRLPFQQLPFTEQSPFALYALSYAMQGVSMLLIALISVQMDCFFTAAMIHAASQLRILSSRIADLQLRNPDLKQQEKASFDVMYKELCLCIQTHQEITRFVKHLENVMNPIAMMQLAVGVFNGCMLIFPATYSSENDALLKCLAAAPTISAQLLLYCLGAHSVREQGEAVPLAAYSCGWADASTSFRRALLVVMTRAQKPLSLTAGRIYPIQRATFLSLLNAGYSYYAVLRNFN…	401	Complete ORF	ALD51476.1	odorant receptor 57 [Locusta migratoria]	0	85.04	6	PF02949	PTHR21137	38	50	1.88	2.05	0.171929	0.577145	0.739782	noDEG
OchiOR70	Unigene734_All	GCTAAGTTCAAGCCCCAAGTAACGGATGAGATTAGCAGTCACAATGAACTTGGTTTATGGGTGGAGCAACATAAGAATGTAATTAAACTAGTGCAGAACCTGGAACAGCTCCTGAACATGATCATCCTGTTTCAGTTTATTGGAGGAACAATAATAATTTGCGTGACACTGTACCAAAGCTCTGCTAAAACTGGTGACGTAACAACGATGTTCAAGTTACAGCTTTACCTGGGGACGATGTTGTCCGAAATATTCATGTACTGCTGGTATGCGGATGGAATAGTCCAGCAGAGCGCGCGCCTCGCCACCTCGGCCTACTCCTGCGGCTGGCCGGACGCCTCGCAGTCGCTGCGTCGCTCTGTGCTTGTCGTGATGAGCCGCTCACAGCGGCCGCTCACA…	512	AKFKPQVTDEISSHNELGLWVEQHKNVIKLVQNLEQLLNMIILFQFIGGTIIICVTLYQSSAKTGDVTTMFKLQLYLGTMLSEIFMYCWYADGIVQQSARLATSAYSCGWPDASQSLRRSVLVVMSRSQRPLTLTAGKFYTVSRATFVRLVNASYSYYALLRQMNDH	167	5' lost	ALD51383.1	odorant receptor 31 [Locusta migratoria]	3e-75	85.71	2	PF02949	PTHR21137	15	16	2.52	2.05	-0.13089	0.800226	0.897402	noDEG
OchiOR71	CL1656.Contig2_All	AGGACTCGGGCAGACAGCAGAATTGCCTGGGCGCTGCCACTCCCCTGCCCTGTGGAAAACTGGGACGGTCATCGAGCATGGACGCTGACTCGCTGGTGGGTTCCGGCTTGCCGCTGATGCGGCTGATAGGGCTTTGGCGACTGGAGGACGACACGCGGTCTGTGCCACAAGTCCTGCGCCTAACACCCGTCCTGCTCGCCATCGCCTTAGTAGTGGCCGGCAGTGCTCTCAAACTAACCGTGGACACCCCAGAGCAATTTGAAGAAATGACGCTGTGCGGATTCACTACCAATACTGTTGGTGTAATAGTAGTAAAGGGCGTGATGTTCGTGGTGCATGGAGCCACTCTACGAGAGATGGTGCAGCTGCTGTATCGCGCCAGGGAGCAGTTCACCGTCG…	1996	MDADSLVGSGLPLMRLIGLWRLEDDTRSVPQVLRLTPVLLAIALVVAGSALKLTVDTPEQFEEMTLCGFTTNTVGVIVVKGVMFVVHGATLREMVQLLYRAREQFTVADSNARIRSHYDKLADRLRMIVLVSMLPAMTCWMSAPLVAALGVGAAAGPAQRQLPVPAWFPVDLHSSPTYELLYALQVLGCTLACAVITSTDSFYIRLILLIAAELDILNENISNIRKRNTGPGDEGTTCRCQENVIISFSCKDCLNTFTSTAENTSDEIHKLLVNSICHHQDIIRMVSLLQQAMDTSVFILLFANMANLCSSFFTTAILLQEGGSTAKILKGLFVVPLVVFQTSYFCIFGHIITDKSEKLLNAAMNCEWIACDTRFKRNLLIFMIAAMKPLEITVGKICK…	427	Complete ORF	ALD51386.1	odorant receptor 126 [Locusta migratoria]	1e-137	57.38	6	PF02949	PTHR21137	52	76	1.58	1.93	0.323488	0.207726	0.396717	noDEG
OchiOR72	CL3515.Contig3_All	TTCATTTCCTGCCTGCAGATACGGAATAGAGCTGCCGCCGGCGTCTACACCTAAACCTGGGATTGCATCCGTGCTGCGATGAAGGACAAAAAACAACTCGAGTCCTTGGATGACACCCGCCCCTTAACGTGGGACGACACGCAGCGGTCGCTGCTGAAAGTCAACATTCTCATTCTGTGGGCGCTGGGCGTCTGGCCGCTGCCGGGCTCCAGGATGTACTCGCTGTTCAAGATTTGGTTGGCAACCCTGGCGGTGGGGAACTACATCGAGCTTGGGCTGGGGCTCTGGAGGAACTGGGGTGACATGACCGAGGCAGCTCTCGTTCCTGGACAGCGTGATGAACCCCATAGCCTTGACCCAGTTCATGTTCAGCGTCGTGGCTGCCTGCGTCACACTCTT…	1113	MKDKKQLESLDDTRPLTWDDTQRSLLKVNILILWALGVWPLPGSRMYSLFKIWLATLAVGNYIELGLGLWRNWGDMTEAALVPGQRDEPHSLDPVHVQRRGCLRHTLRGIFHPRRQLCYDQHLLPADTCHPGLLVLLECTQRPRRGSRGVGGGVRLPVVHGQRPLQEYPPHRHVPRPEGAGGHRGEALPHQ	191	5' lost	ALD51502.1	odorant receptor 62 [Locusta migratoria]	6e-23	67.57	0	PF02949	PTHR21137	24	38	1.4	1.86	0.438966	0.236056	0.425754	noDEG
OchiOR73	Unigene22674_All	GCTTCAGGCAGTGCTAGAGCCGCCGTTGTAGGAATGCATCGCAAGGATCCTGGATCAAAATCTGGAGCTGTGTCTGCTAGTCTCCGTACAGCAGGTGGTGGGACAAAGAATATAGACACTCATGCCACCCTGCCTATTGAATTGACGTGGAAGGGAACGTCGCACTCGGTACTCAAATATAACGTCCGTTACCTCTGCCTCCTGGGTGCTTGGTCGCTGACACATTCGCGACTTTACCATCTCTTTAGTGTCACAGTTTTCCTGCTAGGTACGATGCACATTGGAGTGGCAATCTTTGGTGCCTACCTCTCCAGAGATAATATCGAGGAGATGACTCTGATGCTGGCCAACCTATTTACAGTCTGCAGTGGCATTGCGAAGCTGTTGTATTTCGTCAAA…	1375	MHRKDPGSKSGAVSASLRTAGGGTKNIDTHATLPIELTWKGTSHSVLKYNVRYLCLLGAWSLTHSRLYHLFSVTVFLLGTMHIGVAIFGAYLSRDNIEEMTLMLANLFTVCSGIAKLLYFVKDRDMYRQLLTLTHELTARQRSYCEGDPALKSIVVDSERLAARLTLSVPAYIASMSIVWVPMPFIAYANERRLPFVQLPLAKDVSSSTYALMYVMQSVPSLLTFNISFGGDVFFASVMINAAAQLRLLFHRIKDLRIGGRNGGPLSTGGFRSEYTMHNKHDRMYGELCTCIQIHQQIVSYLKLVGKLMGPIAMSQIVFSVLIACISMFQGTYSEDSNAAFKCLAFLPTPGAQVFLYCWGAHNLMEQSEAVSEAAYSCSWVEASGRFKRAISLLMCRAQ…	437	Complete ORF	ALD51384.1	odorant receptor 61 [Locusta migratoria]	9e-172	70.14	4	PF02949	PTHR21137	40	48	1.85	1.84	0.039035	0.899003	0.951426	noDEG
OchiOR74	Unigene5249_All	GCCGTGATGGCCCACACGTCTGTCCAGTTCAGGATTTTGGCGTCTCGCTTCGCCAAACTGAACGCTGGCGAGGCGTCGCTGGCTGACGCTAAACCGAACACTGTCCGAGAACTAAGCTCTCAGGTCCGACTAGGTCACGACGCCATTCACCAGGAATTGCGTGCTTGCATAGCGACTCATCAGAAGCTTCTGAGACTGGTGAGCTTCCTGAATGATGTGATGAGTCCTATGGCGATGATGCAGCTGGCGGTGGGTGCTATCAACTCCTGTATGGTGCTGTTCCCGGCCACATATAGTGAGGACGACGCGGCGGTCATGAAGTGCTGGGGCGCACTGCCGCTGCTCGCCACACAGGTCTTCCTCTACTGCTCCGGCGCCCAGAACCTCATGGACCAGGCA…	455	MAHTSVQFRILASRFAKLNAGEASLADAKPNTVRELSSQVRLGHDAIHQELRACIATHQKLLRLVSFLNDVMSPMAMMQLAVGAINSCMVLFPATYSEDDAAVMKCWGALPLLATQVFLYCSGAQNLMDQAEAVSLAAYSCGWVEASCR	149	3' lost	ALD51449.1	odorant receptor 56 [Locusta migratoria]	9e-49	71.83	0	PF02949	PTHR21137	2	12	0.41	1.82	2.36096	0.0102637	0.0430531	noDEG
OchiOR75	Unigene22306_All	CTTGAAACGGCGCGAGTACTATCAGATCGTCCGCGACTTGGACGAACTCATGTCCTCGCAACGCCAGTACCTAACTGCGAACAAAAAAGAAAATCTGTTGCTGGTGCTGGAATCAGCTCACAAGAAAGCCAATTTCTTGACGATCGTGCTCACAGGGTATATTTATGGGCTGGTTTTTGTATGGTTGCCATTCCCTTTGATACTTAGTCCTTCCGAAAGGTTAATGCCCCTTGTACAGCTACCAGGAAATTATTTCAAGGACCACCTCTTAGCCTACATCACTGCATATGCTATTCAGAGTTTTGTTCCGCTTGCACTGATTATGGTTGTCGACGGTCTCGACTGCTTCTTCGTATCTTCGGTGGTACATGCTGAAGCTCTCCTCAAGGTTCTGTCGGA…	800	MSSQRQYLTANKKENLLLVLESAHKKANFLTIVLTGYIYGLVFVWLPFPLILSPSERLMPLVQLPGNYFKDHLLAYITAYAIQSFVPLALIMVVDGLDCFFVSSVVHAEALLKVLSERIASLGKTHNYDFTVRRLPGPGQESYKTDVGNNSSITAELRSCIVFHQEIIEFLQKLEKAMSIMVLIQLSFSMLNLCMAMYQQTKIPDFTSALKYVMYVPFPTMKIFFYCWAAHNVKEQGEEVSWAAYSCAWP	250	3' lost	ALD51387.1	odorant receptor 49 [Locusta migratoria]	1e-121	80.45	2	PF02949	PTHR21137	17	25	1.52	1.79	0.332395	0.458501	0.651864	noDEG
OchiOR76	Unigene2136_All	GAACTGGAGGCGTTGATGAGCCGACCCACGTTCGTGCACCTGTTTTACAGCCTCATCTGCATCTCTCTGAGCATCGTGGCCTTCACAGTGGTTTTGCAGACCGAAGGGTACTCACCGAAGATTCTCAAAGTTATTGTCGTCATAACGGCTTTCGTTTTCCAGTTGGGTTTCTTCTGTCTACTTGGCAATAGTATCATTGAACAGAGCGAGCGGCTGATGCTGTCGGCGTTCAGCTGTCACTGGCCGGATGCTCACCCCCGCTTCAAGAAGGCGCTGCTGGTCTTCATGTTGCGCGCACTGCACCCGCTGAACATAAGGGTCGCCAAGCTGTACCCTCTCTCTAGGGAGACCTTCTTGCAGATACTAAATGCGTCATACACGCTTTTCAACTTGGTGTAC…	494	ELEALMSRPTFVHLFYSLICISLSIVAFTVVLQTEGYSPKILKVIVVITAFVFQLGFFCLLGNSIIEQSERLMLSAFSCHWPDAHPRFKKALLVFMLRALHPLNIRVAKLYPLSRETFLQILNASYTLFNLVYQTNRRNGLDEPSS	146	5' lost	ALD51455.1	odorant receptor 93 [Locusta migratoria]	4e-55	75.54	2	PF02949	PTHR21137	7	12	1.24	1.62	0.553608	0.410373	0.607508	noDEG
OchiOR77	Unigene17916_All	GGCGCGCGTGCAGCAGGAGTTCGGGCTGTACTCGCAGCTGATGGCGCTGGCCGGCTTGTGGCCGGCGGCGCGCGGCGGCTCGGAGCCGGCGTGGCGGCGCGTGGCGCGCTGGCTGCTGCTGGCCAACTCGCTGCTCACGTCGGCCGCGCTGGTGCGCGAGGCGGCGCGAGCCCGGCAGAGCACCGTCACCGACTTCGCGTGCCGCTGCGCCTTCGCGGTCAGCCTGGGCTGCAACAACGCCATCATGCTGCTGATGGCGCGCCGCCGCCGCCGCCTGCAGCGCCTCATGGCTCTCGCCACCGCCATCCGGCCGCGCGCCTCCTGCCGCTGGGTGCGGCGCTACGCGCACACCGCCGCCGCCTTCATGGCCGTCCAGATCATGCTCTGGATTGCCGGCTG…	1370	MALAGLWPAARGGSEPAWRRVARWLLLANSLLTSAALVREAARARQSTVTDFACRCAFAVSLGCNNAIMLLMARRRRRLQRLMALATAIRPRASCRWVRRYAHTAAAFMAVQIMLWIAGCVCIGPHALLLDISYPVDGLVSGRARQLLLLLDQAAVAFNHMCSVSAFNSMFVHFVVIACQHLQRSIDDLTADNCDIVAVVRHHQQILRYIKELEDVYHIVMLWVFLPMMVVMCIIMFALLTITSVDIAFLEMLAIFLIYFITCGVISICGSMLTSKAERVVLAAYSSGWPERGRRFSGLVRVVMMRFQQPATLTIAKFTPLSINSFSTLVQESFSYLMVMLSLINEKEGEAQPGTVLEVASNYSSHY	367	Complete ORF	ALD51423.1	odorant receptor 140, partial [Locusta migratoria]	3e-101	76.57	5	PF02949	PTHR21137	22	40	1.02	1.54	0.638497	0.0876034	0.212739	noDEG
OchiOR78	CL6586.Contig1_All	CCGCCGACCTCTTGCTGCGTTGTGCTGCGACTGAGCGGGCGACAAAGAGGCGTCAGCAGAGACCGGCAGAGAACGCAGATGGCCGCCCCGCCCGCCGCCCCAGAGCCGTGGCTGTCTGCCGCGGTGCTGCGCCTGCTGGGCCTGTGGCAGCCGCGGACCGGAGGTCGCTCCGTGGGCAGCTTGCTGGCGGCCGGCGTCTCGCTGGGCTTCCCCTGCTGGGCACTCTCGCTGTCCGGCCTGCGGCTGCTCATGGACCGGCCGCAGGAGGTCGAGGAGCTGGCCACCTGCATCTTCATCCCCACCATGCACGGCGCCATGTTCATCAAGTCCCTGTACTTAGTTTTGCGAGGCCCCACCCTGCGGGAGTTGGCGCTGCTGCTGTCCAACATGGCGGCGGTC…	1694	MAAPPAAPEPWLSAAVLRLLGLWQPRTGGRSVGSLLAAGVSLGFPCWALSLSGLRLLMDRPQEVEELATCIFIPTMHGAMFIKSLYLVLRGPTLRELALLLSNMAAVNAPGGRGEQTRQRYRRLGDRVFLAMMATTAVTVVGWVCGPLVQQALSADSPGAPRSLPLPAWLPLDVFASPTYEALYLSQALFIALCSVATTSTDCFYIDLMLRIAAELEILNHSISDLGKKRASTAGSTQYKSADHFSGVEVHLQLSKNVKYHQDILRSIVLLEEAMSTSIFILFLVMMSGICASVLAAAAFLQNVGDLTRALKSILTLPSQLYDIAIYCIFGQIVTDQSETLVLSAYSSGWLEWDPRSRRALLTFSTMAARLLEVRVGKMYTLNRETLLQVLQGSYAMFN…	408	Complete ORF	ALD51483.1	odorant receptor 119 [Locusta migratoria]	7e-87	48.37	4	PF02949	PTHR21137	57	50	2.06	1.53	-0.413033	0.138248	0.293188	noDEG
OchiOR79	Unigene4860_All	CTTCAGAGAAACACCTGCCGTTTATACCGATGCACGGGCTCAACTTCACCTCGATTCCTCTGTACGAACTCGCTTACACGACGCAGTGCACGGCCACTTTCTTCTGGCACCTGGTCAGCGTCGGCCTCGACATGTTCTACGCCAGCGTTATGGTGCACGTCACTGCACAGCTCGCCATCCTGAACGCCCGCTTCACCAACCTCCGTCTGCAAACGGGAGACGTCAGCGGCCGCTCTAGAGCTTCGCTTGACTACATGGTGGTGACAGATGCCCACAGTAAAATGTACGAAGAGCTGTGCGATCTTGTCAGGTCCCATCAAAAAATTATCGAGTACACAAATTACCTGGAAGATGTTATGAATTCGACAGTGCTGGTCCAGTTTCTTTCCAGCGTCCTCG…	551	MHGLNFTSIPLYELAYTTQCTATFFWHLVSVGLDMFYASVMVHVTAQLAILNARFTNLRLQTGDVSGRSRASLDYMVVTDAHSKMYEELCDLVRSHQKIIEYTNYLEDVMNSTVLVQFLSSVLVVCVTLFQATINPEGNTVIKCCLYLPMPAFQIFVYCWCAHDLMDQGLEVCT	174	3' lost	ALD51334.1	odorant receptor 40, partial [Locusta migratoria]	2e-82	80.85	0	PF02949	PTHR21137	10	13	1.5	1.5	0.154513	0.79774	0.895736	noDEG
OchiOR80	Unigene15807_All	CAACATACGACATCACCAGATGATCATAGCATGCGTTGAAGAACTTCAAGTAGCAATGAATTATTCCATTTTTGCTCTCCTCTTCTTCAACATGACAAGCATATGCCTCAACATCTTCGTCATAGCTAGTTTGCTGCAAAGTGACGCCGACTTGATAACGGCCCTGAAGGCTGTTCTCACAACACCTGTTTTCCTGTACGAAAGTGCAATGTACTGCATTTTCGGACAGATGATTATAGATCAGAGTGAACAGCTGCCGCAGTCTGCCTTCAGCTGTGGCTGGACCGATGCGGACGCTAACTCTCAGAGAGCGTTACTTATCTTCATGCTAAGGTCATCGCAACCGCTCAAGATCAAAGTTGGGAAGACATACGAGCTCTCCAAAGTGACTTTCCTCAG…	520	MIIACVEELQVAMNYSIFALLFFNMTSICLNIFVIASLLQSDADLITALKAVLTTPVFLYESAMYCIFGQMIIDQSEQLPQSAFSCGWTDADANSQRALLIFMLRSSQPLKIKVGKTYELSKVTFLRVLNGSYALFNMLYTFHGKK	146	5' lost	ALD51439.1	odorant receptor 111, partial [Locusta migratoria]	9e-67	83.55	2	PF02949	PTHR21137	6	12	0.98	1.5	0.776001	0.266861	0.461139	noDEG
OchiOR81	Unigene17790_All	ATTCTCAGTGCACGTCTATCCAACGTGGGAGGAAGTCACGCAGCAGATGGTAGCGAAAGAGCGGATTTCCCCAGAATGAGGAAAAAGATACGCTCCTGTCAACAGCACTCGTCCAACTCGGAAGTTCTGGAAGAACTAGGGAGCTGTATCAACAATCACCAGCACATCTTGAGTTTCTTGCAGGTCCTGCAACGAGTGATGAGTCCAGTGGCTATGACGCAGTTCGTGTGCAGTTCGGTCGCTGTCTGCATCACCTTGTTTCAAGCAACATGTAATCCAGAAGGAAATTCGAGCGTGAAGTGCTTCATGTATCTTCCCATGCCAGCCTTCCAAATATTCATCTACTGCTACGGTGGACACGAACTGATTGATCAGGGTCTTGAAGTGTCGCTGTCTGCC…	803	ILSARLSNVGGSHAADGSERADFPRMRKKIRSCQQHSSNSEVLEELGSCINNHQHILSFLQVLQRVMSPVAMTQFVCSSVAVCITLFQATCNPEGNSSVKCFMYLPMPAFQIFIYCYGGHELIDQGLEVSLSAYSCEWFGATRRVTSSLLILMCRAQKPLLLTAGKLYPINRITFVSLLNASYSFYALLRQTRDR	195	5' lost	ALD51457.1	odorant receptor 43, partial [Locusta migratoria]	4e-81	76.92	0	PF02949	PTHR21137	13	21	1.16	1.5	0.467879	0.350215	0.553057	noDEG
OchiOR82	Unigene25453_All	CCTCGCAGGAGAGGGAGCTGCACAGAGTGGTTGCCCACTGCGTCCAATATCACGACATGCTGCTCAGAATCGTGTCTGAAATAGAGGACTTACACTGGACGTCGATGCTCGTAAATTTCGCTCTGCAGCTCATTATTCTCAGCTTTTCCGCTTTCGAGGCCACGGCATCAGCTGATATGGCGAGTCCTTTGAAGGGAACGAACCTTGTGACGTACCTCGTGCTGGCCATATTCCAACTGTTTCTACTGTGCCGCTGCGGGGACAAATTGATGGAAGCTGAGGAGGCGGTGTCGCGCGCAGTGTACGAGAGTCAGTGGTTCGACGCCCCGCAGGGCGCCAAACGCAGCCTCAGCATCATCGTCATGCGCTCCCGGCTGATGCAGCGAGTCACCGTCGGCA…	522	MHRVVAHCVQYHDMLLRIVSEIEDLHWTSMLVNFALQLIILSFSAFEATASADMASPLKGTNLVTYLVLAIFQLFLLCRCGDKLMEAEEAVSRAVYESQWFDAPQGAKRSLSIIVMRSRLMQRVTVGKVVALNLVTFSETLSRAFSYFTVLRQIRTSN	158	5' lost	ALD51378.1	odorant receptor 3 [Locusta migratoria]	4e-72	85.71	2	PF02949	PTHR21137	3	12	0.49	1.5	1.776	0.0326111	0.103973	noDEG
OchiOR83	Unigene5362_All	TGGTTCCCCATGCCGATAGTGGCGAATCGAGAGGAATGGCGCCTGCCATTCGCGCAGCACGCTTGGGACAACAACACCAACTTCTACGTGCTGTCGTACGCCGAGCAGTGCGTGATAGCGGCGTGGACCAGCCAGCTGAGTTTCGGCGTGGATCTCCTGTTCGTCGCCGTCATGATTCTCGTGGCCGCGCAGCTGCAGATACTCGCACTACGCATTGCCAGTATGAAGACAGACATCTACCAAGGAAAGCTAGACGATGAGGCGCGATGCGTGAATGGCATTCCGGCGACTTTGTCCGATAAAATGTACGAGAATTTTTGTCTTTGTGTCGAAAGCCACCAGCACATTCTCAGGTTCCTGAAAGATCTGGAGACCACCATGAGTCCCGTCGTAATGACG…	777	WFPMPIVANREEWRLPFAQHAWDNNTNFYVLSYAEQCVIAAWTSQLSFGVDLLFVAVMILVAAQLQILALRIASMKTDIYQGKLDDEARCVNGIPATLSDKMYENFCLCVESHQHILRFLKDLETTMSPVVMTQFCFSVLVACVALFQATYSTDFTAVLKCASFLPVPGGQVYLYCWAAQAVTQQAEMVSAAAYGCSWVEASERFKHAMRILINRAKKPLVLTAGHLYPIDKPAFLSLVNASYSYYALLGQMNKR	2555	5' lost	ALD51496.1	odorant receptor 75 [Locusta migratoria]	2e-109	77.25	2	PF02949	PTHR21137	11	19	1.02	1.41	0.564497	0.29176	0.493756	noDEG
OchiOR84	Unigene8484_All	AGGCAACAGCGGTTCCGACGAAGCTGTACGAGACGCTGGAGAGGACGCGCTACCGCAGCTGGCTTGTGACGGTCGTGTGGACCGTGATGTGTGTGCTGGGCGCCTTACACTGGTACTTCGTGCCGCTGCTCAAGGGCGACAGCAACCTACGCTTCGACGCGTGGTACCCTTTTGACAGCCAGCAGCCAACTGTCAAGCAGGTGGTGTACTGGCTGCAGTTCTTGTGCTCCTTCTACTCGCTGCTGATGCTGTGCTTCTTCGACTGCCTGCTGGTGTGGCTGCAGCAGCTGCTGTGCGTCCAGCTGCGCTACCTGGCCGCCAACATACGCGACCTCTCCCGCAACGACGCCGCCCTCCATGTCGATCGGCGGCGGATGTTGGCCATTTGCGTCTCACACC…	860	MYETLERTRYRSWLVTVVWTVMCVLGALHWYFVPLLKGDSNLRFDAWYPFDSQQPTVKQVVYWLQFLCSFYSLLMLCFFDCLLVWLQQLLCVQLRYLAANIRDLSRNDAALHVDRRRMLAICVSHHDHILRAMRELNACVAPLLFLQCFKNMMVLCVVAFLASVAGVNDLLELSSLLLYFMAACQQLFFYCWCCEELTHLGLELGDAAYDSGWENWDVSSQKSIVIIMWRAQKPFIFKGAWFYTLNVATFIDLIKLSFSYYTVLQSMREG	270	5' lost	ALD51389.1	odorant receptor 4, partial [Locusta migratoria]	8e-134	82.91	4	PF02949	PTHR21137	19	21	1.55	1.38	-0.0796091	0.861263	0.934461	noDEG
OchiOR85	Unigene20428_All	GTCTTCCTCGACACCTCTTTCCAGATCCTCATGCTGCAGATGGCTGCCGAACTGGAGGTCCTCAACGACAATATTGCTGCCATCCACAACAGGGATGTGAGCCCGTCCGAAGTAAAGGGAGCGGAGGACGGCAAAGACGACGCATCGGTACAGAATAAAAAGGCCGAAGCCTTTGGCAGACTGCGACACGGAGAACTTCTTACGCAGACGGCAGAGGATGAAATGTACAGTCATCTCGTGAGCAGTATAGAGCACCATCAAACAGTAATAGGGTGCCTAAACCAGCTAGAAACTGTGATGAGCCACTCGACGTTAATACTCTTGTCATCCAATATGGTCTGCATCTGCTTACACGTCTTCGTAACGGCAGTGCTGTTGCAGGATGAAATTCAGTTTGAC…	787	VFLDTSFQILMLQMAAELEVLNDNIAAIHNRDVSPSEVKGAEDGKDDASVQNKKAEAFGRLRHGELLTQTAEDEMYSHLVSSIEHHQTVIGCLNQLETVMSHSTLILLSSNMVCICLHVFVTAVLLQDEIQFDKTFKMMCAFAIYTYQTGLFCLIGQTIIDQSERLVNSAFSCAWPDADARFKRSLSIFMLRSARLLEIRVGKMYTLSRETFLQILNGSYRLFNLLYQTNLEN	233	5' lost	ALD51475.1	odorant receptor 98, partial [Locusta migratoria]	1e-44	43.93	2	PF02949	PTHR21137	24	18	2.19	1.32	-0.639037	0.152421	0.317721	noDEG
OchiOR86	CL1269.Contig8_All	CGGCGGTACAGTGAAGTCCTCGACTTTCACTGCGCTGGGAACAAACGACTTGGGAGTAGCGTACTGTGGACAGCATGGCATCGGTGTCTTCGGTAGCGGCAGCAGCAGAGGCTGCCAGCAACCTCAACCACCTGCTGCGGCCGTTGCACTGGACTGCCGTCCTCCGTCACCCTAGCGACGCCACCAGACCGCCTCTCTTGTTCCGACTGTGCTCCGTTGTGATAGCACTGGTCGTCATGTGTTTCATCTGCTCGTCGGTCGTCGTGCTGTTCCGCGAGGGGACGGCAGACATGGACGTCTTCATTCTGGTCCTGAGCACCGTCGACACTGCTGCCATCTGGATCTTCCGTATGGTGCACACCGCGGTGCTCGAGCGCGACTTCCACAAGCTCGCTCTTC…	2045	MASVSSVAAAAEAASNLNHLLRPLHWTAVLRHPSDATRPPLLFRLCSVVIALVVMCFICSSVVVLFREGTADMDVFILVLSTVDTAAIWIFRMVHTAVLERDFHKLALQVGHDFAEFLSWDDIPELRTQSRVVRRFTLAFSWFGIAACSYCLVSPVGSQGLPFILALPFDATQPLAYAASWLFCTVVTLHAVVMTIVLDCFNVSLISQLRMQLALLSNKIVGLAKDMSDGPIQSAETSTYKELHYRLHRCILHHQAIIKNADLLERSLGAMLLAQSISIGAAACFQMFQVATSADGLQQMGKFGCYMFTMLSELFVYCWFGDDLITESENLVLAAYDAVTSLQGCPVSISRSLLLLMHRAQRPLCITAGGFFPLSRESFVAVLNVSYSFFAILRNFKEE…	401	Complete ORF	ALD51481.1	odorant receptor 24 [Locusta migratoria]	3e-166	72.93	4	PF02949	PTHR21137	132	52	3.9	1.29	-1.56795	2.37955e-12	5.4571e-11	Down
OchiOR87	Unigene18718_All	GGCGCCGACCGCGAGCTCGCGCTCTGCCTGCCCTGGTTCCCCTCCTACCAGCCGGACAGCCCCTCCTTCCAGCTGCTCTACGGCTACCAGGTGCTGACGCTGCTGCTGGTGGCGCTCTGGGTGGGCGCTCTGGACGCCTTCCTGCTGGTGCTGCTCGTGTACGCCGCGGGGCAGCTGCGCGTCCTCAACTGCACGCTGCTCCAGATGGGCGCCCGCAGTGACGACGAGCCCATCGACGAGCGACGTGTGATGACGTCACGTGCAGCGTCAGATGCCGTTGCCACCGCCATGCTGAGGGAGTGCGCGAGGCACCACCTGCAAGTCTGCAGGTTCGTGCAGAGCGTGGAGGAGGTGGCGGCGCCCGCGCTGACGCTGCAGCTGCTGGTGAGCACCTTCCTG…	439	MQSRKVLTSSCSVSAGAATSSTLCTNLQTCRWCLAHSLSMAVATASDAARDVITRRSSMGSSSLRAPIWSSVQLRTRSCPAAYTSSTSRKASRAPTQSATSSSVSTW	107	5' lost，3' lost	ALD51432.1	odorant receptor 7 [Locusta migratoria]	4e-54	75.34	0	PF02949	PTHR21137	5	8	1.08	1.28	0.454073	0.574859	0.742492	noDEG
OchiOR88	Unigene18121_All	GCGCTGCCCGCAGTCGTCTGGGGGCCCTTCCCCTTCACCGAGTCGCCGGCCTACGAGGCGGTGTACGCGGCCGTGTCGGTGGCCATGTTCTACGGCTACATCCTGACGACGACGCTGGACGCCTTCTTCTTCACGCTCATCGTCTACACGGCGGGCCAGCTGCGCGTGCTCAACCTGATGGCCGCGGGGCTCTGCGCGCCCGGCAGTCCGGGGCAGATGAGGGCGCGACTCGCCGACGTCGTCTGCTACCACGTCCACATCGAGAGGTGCGTGCAGCGGCTGTGCGCGCTGGTGGGCCCCGTGGTGCTGGGCCAGTTCCTGGCGGACATCGTCACCATCAGCGCCGCCACCTTCGTGGCCACCGTCACGGAGGCGGACTCGGTGTGGCTGCTCAAGTTC…	754	ALPAVVWGPFPFTESPAYEAVYAAVSVAMFYGYILTTTLDAFFFTLIVYTAGQLRVLNLMAAGLCAPGSPGQMRARLADVVCYHVHIERCVQRLCALVGPVVLGQFLADIVTISAATFVATVTEADSVWLLKFSSYLLAIAEQLLLYCWFGSDVTTESERLQLSVYSSDWPAAPARFQRDLCMVLRRGQRPLRLSAYKFYSISRETFLMLMNTALSYYAVLRQLHGN	227	5' lost	AHB17947.1	odorant receptor 5 [Locusta migratoria]	2e-78	63.79	3	PF02949	PTHR21137	10	16	0.97	1.24	0.454073	0.427634	0.622375	noDEG
OchiOR89	Unigene5423_All	GCCGGCCGCGCCTGCTGCGCCTCGCCGGGCGCATGCGGCAGCTTCCGCCGCTGCCCGCCAGGAGACGCCTGCAGCGCCAGGTGGTCCGCGCCACGCTCGCCACCACCGCCATGCTCTCCACGCACATCGCGCTGCAGATGCTCTACTGCCTGCTCTGCGAACCCGACCAGCTGCTGACGGACATCCGCTACCCGCCTCTTGACCTGGGCAGGCCCCGCGTGCGCCAGCTGCTACTGGTGGTGCTGCAGGGCTCCGTGGTCTTCTACAACATATACACCTTCACCGCCTTCGTGGGTCTCTTCATGTACCTGTCGGTGCAGGTGCGGGCCCACCTCAGCGCCATCTCCGACGCCCTCACACACCAGGCCGCCGATATCGACCTGCGCGCCATCGTCCACC…	861	MRQLPPLPARRRLQRQVVRATLATTAMLSTHIALQMLYCLLCEPDQLLTDIRYPPLDLGRPRVRQLLLVVLQGSVVFYNIYTFTAFVGLFMYLSVQVRAHLSAISDALTHQAADIDLRAIVHHHQEVLSFLSEMEAVYHPLLLLDFLPLVVVICLMAFVLISMEGVDLMFVQTLTIFFLYFLNVGTFCFFGTQITSQAEAVSLSAYSSGWEERGRAFSSAVLLVLQRAQRPFTLTAGKFAPVSITTFSQMMQDAFSYLMVMRTLIGSKDHASPAAA	276	3' lost	ALD51423.1	odorant receptor 140, partial [Locusta migratoria]	1e-41	41.89	3	PF02949	PTHR21137	12	18	0.98	1.18	0.360963	0.496682	0.685539	noDEG
OchiOR90	Unigene3231_All	AAACAACATTAAAAGGAGTTGTGTTCATAGAATTTGTTGCTGGGATCATCGTGACGTGCCTCACACTATTTCATGCAGCGGTTAATGCAGGGAACATGGCTCTGTTCTTGAAGTTTATAATGTACCTCCTATATATGACAGTTGGGATGTTCATATACTGCTGGTATGGTCAAGATCTAATCCAAAAGAGTGGGGACGTGAGGTGGGCCGCGTACAGCTGCTGCTGGCAGGGTGCGCCCCGGGCCTTCACAGCCCTGCTCAGGGTGGCCATGCTGTGGGCCCAGAGGCCGCTCACCCTGTCTGCCGGCAAGTACTACAGGGTCTCCCTCAAGACGTTCGTCACGTTGCTGAATGCATCTTACTCATATTATGCTGTTCTGAGGCAAATGAATGACTCAC…	425	MALFLKFIMYLLYMTVGMFIYCWYGQDLIQKSGDVRWAAYSCCWQGAPRAFTALLRVAMLWAQRPLTLSAGKYYRVSLKTFVTLLNASYSYYAVLRQMNDSQK	103	5' lost	ALD51442.1	odorant receptor 28, partial [Locusta migratoria]	9e-62	82.84	2	PF02949	PTHR21137	4	7	0.92	1.17	0.583355	0.509808	0.697473	noDEG
OchiOR91	Unigene17797_All	CTGTGTCAAGCAGCATGGACTCCTGCTACGATTCTGCAGAGAACTCTCAGACGCTCTGAGCCCAGTACTCCTCTCGCAGTTCACCTTCACCATCGTCATCATATGCCAGACAGCGCTGCAGACAACCATGGAACCAGAACTGAATCCAAGAACAATGAAATTCATGGGTCTCCTATGGCTTGGCATTTCTGAGCTCTTCTTGTACTCCTACATGGGGCACAGAATAATGTCACAGGCGAGCGACGTGCAGCTGTCGGTGTACAGCTGCGGCTGGCCGGACCTGGACGACCGCTTCAAGAAGAGTGTCTCGTTCATCATCCAGCGAGCGCAGAAGCCTCTGCACTTCACCATCGGCAAGATGTACGTCCTGTCGCTGCGAACCTTCGTGGAGATGATGCG…	545	MLRFCRELSDALSPVLLSQFTFTIVIICQTALQTTMEPELNPRTMKFMGLLWLGISELFLYSYMGHRIMSQASDVQLSVYSCGWPDLDDRFKKSVSFIIQRAQKPLHFTIGKMYVLSLRTFVEMMRISYAFFTLLQQVNGD	141	5' lost	ALD51470.1	odorant receptor 68 [Locusta migratoria]	5e-23	33.56	2	PF02949	PTHR21137	3	8	0.46	0.94	1.19104	0.19536	0.380139	noDEG
OchiOR92	Unigene17879_All	CAGATATACTTCTACTGCTGGACGGCCGACAACATAACGGAACAGGGTGAGGCGATATCTGGAGCAGCCTACAGGAGCCAGTGGGTGGGCGCGGGCACGCAGTTCCAGAGGGCGCTGAGCACCGTGATGGCGCGCGCCCACCAGCCGCTGCTGGTCACTGCGGGGCGCCTCTACCCCGTCAACAGGGCGGCCTTCGTAGCGCTGATGAAGGCTACTTACTCTTACTACACCCTGCTGAGGCAACTGGACACATAATTACCATGGAAGAGGAAGGCTTTGAGCAAAATGCAGACACATCACTGGAGTCTCTCCTTCACAAAGCACACCATGGAGTTTAGCTGACTAGTCTGGATCCTCATCAGAAACCACCACAAGATGGGAGGAGCAGCAACAAC	395	QIYFYCWTADNITEQGEAISGAAYRSQWVGAGTQFQRALSTVMARAHQPLLVTAGRLYPVNRAAFVALMKATYSYYTLLRQLDT	84	5' lost	ALD51368.1	odorant receptor 138, partial [Locusta migratoria]	1e-28	75.61	0	PF02949	PTHR21137	2	4	0.52	0.75	0.776001	0.521494	0.705824	noDEG
OchiOR93	Unigene22532_All	ACCTGCCGCTCGATGCGGACGCTGCTCCGGAGGGTCTCTTGCCGCAGCGTCGGTCGGCGAGGCTGGACGAGGAACTGTACAGGGAGCTGAGTGCCTGCATCCAGAGCCACCAGGACCTCGTGAGGCTGGTGCAGCTGCTAAACGATGTGATGAGCCCCATAGCCATGACGCAGTTCGTGGTGGGCGCAGTCAACGCCTGCATGGTGCTCTTCCCAGCTACATACAGCACCGACGTGGGGGCTGTTCTCAAGTGTTGGGCCGCCCTGCCCATGGTGGGGATCCAGATCTTCCTGTACTGCTCGGGAGCACACGACATCATGGAACAGGCGGAAGCAGTGTCTAACGCGGCGTACGGCTGCTCGTGGCTAGGGGCGGACCGGCGGCGGTGGCGCGCCCTGC…	479	MSPIAMTQFVVGAVNACMVLFPATYSTDVGAVLKCWAALPMVGIQIFLYCSGAHDIMEQAEAVSNAAYGCSWLGADRRRWRALLLVMCRAQRPLQLTAGKLYPINRPTFL	110	3' lost	ALD51452.1	odorant receptor 53, partial [Locusta migratoria]	8e-63	82.31	0	PF02949	PTHR21137	6	4	1.12	0.56	-0.808962	0.379133	0.574719	noDEG
OchiOR94	CL2639.Contig7_All	TCCGGATTCAGTCTTCGAGAGTGAAGTCTGCTGTGATGGTGGCCATCGGATCCCGTGCTAAGCTGATATTTGTGCAACAACGCAAAAACTCCAGCAAAGGGCTCGATGGGGGTGACGTGGAGGGCGCCCCCGCGCAGGAGAACGTGCTGTGGCGCAACATTATGGTGCTAAGGCTGGCGGGCGTGTGGCGGCCGGCTGGCGGGTGGCGCGCGCGCGTCTACCCTCTCTACTTCTCCGTGGTGTGCGCCAGCATGCTGCACATCGGCGTGCTGGGCGCGCTGCGCACCTACTCCATCTGGGGCAACATGACCGAGGTCACCTTCGCGCTCGTGTCCGCCTTCACCTGTTTCAACGGGGCCGTCAAGATGATCCACCACTACACCCACAGCGAGACCTACT…	2519	MVAIGSRAKLIFVQQRKNSSKGLDGGDVEGAPAQENVLWRNIMVLRLAGVWRPAGGWRARVYPLYFSVVCASMLHIGVLGALRTYSIWGNMTEVTFALVSAFTCFNGAVKMIHHYTHSETYYRLVSELNVLIDRQRPYCDQDDELMAAYQATYRRARRLTVGVLAYMFVTGAMWATVPLFMEFPPGDPSSPLPLVTITGVHRVYNNTLYSLGYLSECHTVLYWNFSSLGMDVFFGSVMIHVTGQLNLLHIRLARLGVDRAGEDLIGSSAFGKDSQQQKRDIHDPPSMYAQLCDCVKDHQEILRYLDFLEELMNPVPLAQFLLCVGGICLTLYQITFNPDGGGVIENILFLPIPALQIFIYCWAGHGIMEESESLSFAAYSCDWSGVGREVSNALRIVMS…	444	Complete ORF	ALD51367.1	odorant receptor 47 [Locusta migratoria]	0	77.03	5	PF02949	PTHR21137	31	25	0.74	0.49	-0.534339	0.166105	0.339539	noDEG
^ Protein domains predicted using InterPro protein sequence analysis & classification database as implemated in Geneious
 TMD − transmembrane domains
 Pfam − PF02949 (7tm_6; odorant receptor, Drosophila)
★ PANTHER − PTHR21137 (odorant receptor, Drosophila)

## Sheet: Sheet 4-IR
Gene Name	Unigene ID	Transcript 5'-3'	Transcript length	Predicted protein sequence	Predicted protein length	Status	GenBank accession	NR_annotation	E value	Identities(%)	Predicted Domains^		MA_rawfragments	FA_rawfragments	MA_FPKM	FA_FPKM	log2Fold	pvalue	qvalue	Diff
											TMD (No.)	Domains✚
OchiIR25a	CL4523.Contig2_All	GTCCATTCCGTGCCGCGCGCCGCCCGGACAGCTCATCGATAAGGAGGCCGCCGGACGCCTGCTGTCCGCGCTGGGCCGCACCGGAGGAACAGCACGCCCGGCCACCCGCGCCCTCGCCGTGGCTGCGCCGCGCACTCAGCTCCATCATGATTCTTCTACTACTGACGGCTTTACTCAGTAACTTACTCTCAGCATTGGGGGAGCCCACAATCAATTATCTCCATGTAAATGATGACAGGAACTTGATTCCAGATAAGGCTCTTAAGCAAGTTATTTCTGAGTTATCAAAACAGGGAATGATATTTGATGGTGTTTTTAAAGCTACAGCAAATGGCTCTGATGTTGAAGCTTTGATAGATTCCATGTGTCTTGGATATAATTCATCAATTGATCAAAATA…	3201	MILLLLTALLSNLLSALGEPTINYLHVNDDRNLIPDKALKQVISELSKQGMIFDGVFKATANGSDVEALIDSMCLGYNSSIDQNKKIHIILDTTLQDVSSEAVKYFTRTLELPTVSASCGQEGDLRYWRNIDKKQEKYLIQVMPPIDTIPEFVRSFCSEQNLTNAGILFDDTFIMDHKYKSLLQNVPTRHIINEIKFQNISNQLSTFKQREVFNYFILGRMDTVNRVLEAAAEMEFYGRQFGWYAISQDEAIPSCKKCGKGASVLHLKPNDPEGTVTGSENPKLTYQFYYELFRNTFLAIAQMIDEGSWPDMEYIPCEKYEESKNVPPMRQLNILDALHQISVQNPGAYGQILLSSNGHSHMQFNMTAFNVSLSDNSATEVGNWAADLDSPFITKVKPS…	903	Complete ORF	AFP33229.1	ionotropic receptor [Locusta migratoria]	0	93.56	3	S1 M1-M3	1261	1258	22.97	19.36	-0.227436	7.34469e-05	0.000631102	noDEG
OchiIR8a	Unigene8348_All	CGGGAAGCCAGGGGCACCGCTGCGCAACCACGCGACGCCCGGCGTGTATCACAGGTCTCGCAATGTGGCCGCTGTGGGTCTCAGTCGTCGCTGTCCAACTGCAGTTCGCATCTCCACAGGCGACCTCCGATCCCCTGATCATCCGATTCCTGTTGGTGACGGAGGTGAACGCCACCTGGGTTGGGGGCGAGCTGCGAGCCAACCTGAGCGGGCTGGAGGCGCGCTACGTGGGACTCCGACTCCAGCTGGACCTCAGCGCCATCGAGGTGGACCGCGAGCACGAGGTAGAGGAGTTCCAGCAGAAGGTGTGTGGGGAGATGGCGGCGGGCGTGTCGGCGCTGCTGGACGCCACGTGGACGGGCTGGCGGCGCCTGCGCGACGAGGCGCAGCACCGGGGAC…	3328	MWPLWVSVVAVQLQFASPQATSDPLIIRFLLVTEVNATWVGGELRANLSGLEARYVGLRLQLDLSAIEVDREHEVEEFQQKVCGEMAAGVSALLDATWTGWRRLRDEAQHRGLPYLRLDATLANLVDAVDKYLQAREASDAALIFHTEEELDQALYHLIGNSVLRVIALNGLEKDTVSRLKDMRPVASYFVIFADTAHMGELYSKAAAGGLVRKAERWTLVFTDWSWASFNYRQLNLSTALLQMKRTSCCPLQGEPDNCKCTLQKVAPAFLRAALSAVVEALTELHSKGLDVRPTARQCSLPEPGSDDDDGGGDDTEAATEAPPNATGNYDAFLRAIAPRGQGNSTLFFRSPPAQLTFNTPLQLRMFNQSEDFNLGDWSPEKGLQLNTQLKPAKRFFRV…	896	Complete ORF	AHA80144.1	ionotropic receptor 8a [Schistocerca gregaria]	0	92	3	S1 M1-M3	766	754	13.4	11.15	-0.246779	0.000832619	0.00532726	noDEG
OchiIR76b	CL4555.Contig1_All	CAACGCTAGCACTCGACGGCTCGCAGCAGGTGAAGTACAGTCCTTTTCAAATCAACTGACTACTTCGACGTCTGAGATTACCAGAATGAACCTTTCGCCTATCTTAAAGATGGTGGTAACCACTGTCTGTTCCAATTACCTCTTCAATGGCACTAAGATGGAGGTACCCGAAGGTGAGCCAGATCCCGGTTGCGTTCTTCGAAAACCGAAGCTAATGGAGGGGAAGACAATCAGAATCGGAACTTTGGAAAATCCTCCGTTAACGTTGACCAACAAGACTGATGGCGCTTTGATTGGACAAGGAGTCATTTTTGAGATAGTGGATATTCTGAAGCATAGGTTGGGCTTCAACTATGAAGTGGTGAAACCGGAGTTAAACATACTAGGAGACGAAAATCA…	6119	MNLSPILKMVVTTVCSNYLFNGTKMEVPEGEPDPGCVLRKPKLMEGKTIRIGTLENPPLTLTNKTDGALIGQGVIFEIVDILKHRLGFNYEVVKPELNILGDENHGIIGLVHKKQVDVAVGYLPQFSQHARLVRHSESLAEAPWVFLMKRPLVSASGTGLLAPFDATVWYLVLASVVLMGPAIYIIILVRVRLCAGSERLTRIFPLSSCVWFVYGALMKQGSTLMPVTDSSRMLFATWWIFITLLTSFYTANLTAFLTLSRFTLQITDLKDISTKKAHWAAQRGSAMEYLVYNNDEYSFLNQSLQAGYGQFVDVSDADMLLRIKKDDLVYLREKQHVEHTMFRDYLEKTRNPLVEEKDRCTFVMTKQPFLHLPIAFYYPLNSSLAHIFDPLLKALVETG…	535	Complete ORF	ALD51347.1	ionotropic receptor 76b [Locusta migratoria]	0	91.4	5	M1-M3	476	600	4.41	4.73	0.110001	0.211629	0.402337	noDEG
OchiIR22	CL1803.Contig5_All	GGCCTATCAGCCCGGAAATTTTAAATGTAATTGACACTGGCCGTGAAAGCCTACATTGTTTGATGGTAATACTAATCTTTATAAATTATTGCTACTCTTCCTCCTCTAATTACCTCTGATGGGAAGCATTCAGACATCACTTCCTCGCATTTCCCTTGCAAGACAATAAATTTACAAAGTACTTTTACCATGCATTTACCCAATTTTTGTCATTTCCCCTCTTATTAACATTTTGAAATTCACTGAAATGTATGAAGATCATGCAAGTACCTTCCAAATAAAATTCTTGTAACAATGCTGCTACAACAAAACTGTTTAAAAATATTGGGGCACAAGAGGGCTATGTAAATGGTACATTTTCTTCTTAATTAGCAACATAGAACTGCAAACATGTGGGTG…	6965	MRAWAHRGLRASVHDPSQLRTDLGRLLDTRRGAVVVVVVADISCPGALLLFHKAAERHLLGMTRHWLLLRGVEPLQFPELALDSSVTIASPGPSGSSSWLLQDAYGLRDKLFLSEPVSWLPGQNLPASPVRDNLHGITIKAGIVRLFTDFAHFEDPTYRHVDTWSKFCYAVSKVLGERLNFTQEIVFTKQWGVRVSPGVYRGLVGQLQRGETEVALGFALRSDRLDFIDFTTPVGRFQPAFMFREPSLAAVSNVYTRPFSRGVWLSYSLAALLLALLVVASQRLLARAQGLLLSADTDPAVVPPWADVPLVAFSIICEEGMQDPPQNVSSRILLMFLLVLAVFHVTAYSACIVSLLQLPSGSINALDSLFGSKLRVVMQDVPYNVNYGNETKDPLTRSF…	576	Complete ORF	ALA15335.1	ionotropic receptor 22 [Locusta migratoria]	3e-121	74	3	NA	403	271	4.29	2.45	-0.796486	1.14216e-12	2.6993e-11	noDEG
OchiIR6	CL5021.Contig1_All	GTCCAAGTTACCATATAGACTGAATTCAGAAAAGAATCAGATACTAAGTTCATGTTAATGAAAGTATTATTTCTACAGCCAGGTGCACCGTTAGCGAAAACGAATATTAGCGTACGTGGAGGACTCTGAAACTGTAGGAAATGCGTATTGTGCTAATGATGGCCGCATTAAGAATTCCGCTGTGCTATGGCCGTTTGCTACTGCAGAATGATAATCTCAGCTCTTTCGATAGTTTAATAGGTGAAATGGGGTCCAGAATTCTGCTGAAGGAATTTGGAAATTACAAATGTGTAGTTGCGTTGTCAGATGCTCCAGAGGGCTTAACTTCTTTGAATACAGGCTTTCTCTCAACAATACGAGTATCTCTGGACAGTGCAGACGCCCCTGTGGAACATCTCC…	2521	MRIVLMMAALRIPLCYGRLLLQNDNLSSFDSLIGEMGSRILLKEFGNYKCVVALSDAPEGLTSLNTGFLSTIRVSLDSADAPVEHLLVSALDADCQGLVVRCCDATAGVAALFRASKLAIRRVNRRILVLPATLVPQINVSSIFSLRNIEITPDIIVARVAENTESFELVTLRFTGEDTWRDELVVARWSRGRGFQPPSADLYPDKLADLQGRRLALATFHFPPYVILDPDANVFDGIDTRIILEFFRKINATWRVLEDTMGMGMWGTTWENGTGIGILGAVAMDKADMAFVGLYCWYTEYRFVEFSRPYQRGGITCLVPRPLLMPGWQVPILPFSPVLWASVFCSVIFATAALYAVKKLSDRVLGTEEGSAGGRYSTVEDCFFRSVGLLVLQTPDVER…	656	Complete ORF	ALA15330.1	ionotropic receptor 6 [Locusta migratoria]	0	64.63	3	M1-M3	133	153	3.13	3.03	-0.0218936	0.897799	0.950349	noDEG
OchiIR17	Unigene7816_All	AGAACCCAGCTGATTGTAAAAAAGGATCCTTCCTGTGGCTCTTATGACAATGGCCAGTGGTCAGGGATGGTAGGTGATGTCCATGAAGGAAAAGCACATGTTGGGCTTTCATTTTTCACAATGTCTGCAGCAAGGACATCAGTGGTATCATTTACAACACCCATATTTCTTGGAAGATACTATATATTCATCAGAAGAGATGGAATTACTCAGATGGATCCACATCCTCTGGAGCTTCTGGTTCCACTGAAAAATGATTTGTGGCTAGCAGCAGTGTTTACTTTATTTGCATATACCATTGCCATGGCATCTATATTTTATATTCAAGGGAAACCATTAAGTGATGCTGTCTTCTCAATCATTGGAGCATTTGTCCAGAAACATGATGAAACTACAAGC…	941	MVGDVHEGKAHVGLSFFTMSAARTSVVSFTTPIFLGRYYIFIRRDGITQMDPHPLELLVPLKNDLWLAAVFTLFAYTIAMASIFYIQGKPLSDAVFSIIGAFVQKHDETTSYHHRITSEQCLRFVAYITGSILLSAYSAVIISILTVTKQKLPFQSFAEFEQDGSYTLSVTGNSFEYDFFKLSQQKLLQKLFSNQLDIHNPPRTKLEGLSRVCTEKKYGFLSTDLSIQSSWSHQDCNVIAVPIDMFRCTLALILRNDSPYIGAINFHIQILRAAGLLNHMLIFYNIRDTSS	290	3' lost	ALD51337.1	ionotropic receptor 17, partial [Locusta migratoria]	4e-141	77.91	3	NA	26	19	1.89	1.12	-0.676511	0.117207	0.267085	noDEG
OchiIR20	Unigene12372_All	CAGGTGTCCAAGGTTTACATGTGCGGTACTTGCTGAGCTAGGAAACAATGACACTGCTTTGTCACACATCTGTGATACTGGGTATATTCATTCTGTGTTTAACTTCTACAGTTCTCTGTAAAAATCAGAATGATCACAGTAACGATATTAAATTTATTCTTGACTTCACCCGCCACACGATAACATCATCTTCCATTAAAGGAGTCCATGCTTTCGTCTGCTGGAACGCAGGGGACCTTCAGTTAATTAAGGCGCTCTCACGCAGTGGGATACTGGCGTCAGTGTACAATGGTTGGCAGAACTGGCAACAGCTTCCTACATTTCACATAGATGGGAAATCTCTGCTCTTCATTCTCGACTTGAAATGTGAAAAATCTTTCTTCCTACTACAGAAGGCCG…	2292	MTLLCHTSVILGIFILCLTSTVLCKNQNDHSNDIKFILDFTRHTITSSSIKGVHAFVCWNAGDLQLIKALSRSGILASVYNGWQNWQQLPTFHIDGKSLLFILDLKCEKSFFLLQKAGKNEELFRPPHIWLILHKAYSPGNLHTVDVGDDNSPISATINNERKYVMQQNIAAITYNNTKLTEAEDLGGEFNSVEVYDHSYGTGPTRSTGYVNGNGTHGTQISSRIRKRNLGFKSKETNDNNPAHVIMERCFYCEVFRDLNILVDSEVIVGRRETENKYTILEAYRRRKHGDLVVSELGYWERTAGIVWRAVRQVAIRRLDLKGTKLVASIVITNPETLDHLNDLHNRHIDTVTKLNYLLLLHATEVLNASLELVVTDEWGYESNGSWSGLVGSLQRAEA…	748	3' lost	ALD51366.1	ionotropic receptor 20 [Locusta migratoria]	0	67	3	M1-M3	43	73	1.12	1.6	0.539561	0.0472813	0.139084	noDEG
OchiIR28	Unigene7467_All	GGAGTGGTGGTGGACACGCCGCCAGACAGGCTGGGGCAGCGCCTCCTGGTGGTGCAGGACCGCCACCTGGACACCAACATCCGCTTCGGCTGGGACCTGTGCCAGAAGCTCAGCTTCATGTTCAACTTCTCGGTGGTGCTGTACAAGACGGAGTCCTACGGCTACCTCACGCCGAACGGCTCCATCGACGGGCAGGCGGGCATGCTGTTCGACGGCACCATCGACCTGGCGCTGTCCTCGCTGGGGATGTCGCACCACAGACTCGACTTTATCGACTTCACCGCTCCCTCGCGCATGTGGACGCTGAAGATGGTGTTCCGGCACCCGCGGTCGCGCGCCGTCTACGGCACCATCTTCCGGCCGTTCTCGGCGGCGCTGTGGCTCAGCAGCGGGCTGCTC…	1304	MFNFSVVLYKTESYGYLTPNGSIDGQAGMLFDGTIDLALSSLGMSHHRLDFIDFTAPSRMWTLKMVFRHPRSRAVYGTIFRPFSAALWLSSGLLFLLVLLVARLGCWAAAHHAADDSWSAAFLLVSSAISQQGTTLDTRRPSWRLLVLLSFACALLLDTYYTAAIVTSLLLPPPRTINTKADLVHSPLAVGMENISYTHEYFEKSSDPVDHALMEHKVWPRGVRQPNYHSLLAGVRKVATEPFAFTAEDVSLYPLLDRYVTEADKCSLVAIDFLRSRSTYMPVRKNSPYRELVTIGLRKLLERGHISRTRSLWHARPPACLRESEFATVELVTLAPAFMLLAAALLLASLLLLFELRHAARNGKQSLVGREQSGRRIEGLLVTSPRRQRVSVSQS	394	3' lost	ALD51365.1	ionotropic receptor 28, partial [Locusta migratoria]	7e-176	87.93	3	S1	37	48	1.82	1.95	0.15151	0.629011	0.783544	noDEG
OchiIR29	Unigene9947_All	CCGCGGCCGCGTCCCGCCAGACGCCGCGATGCGCCCGCCTGCGCTCTGTCTGCCCGCGGTGCTGATGGCCGCCGTTGGCTGCCTGCTGTGGTGGCAGCCCTGCTCGGCGCTGCTGGCCCAGCACGCCACTAGCCTGGCCGTGGACTACCTCACTCTCAGACACGCCCGCACCGTCGTCACCTACACCTGCAGCCCATACGACAGCAGACGCCTGTCCCGGCTCCTGCTCGAGAGACTGCAGGCTTGGCTGGTGCTGTCGCCTCATCCCCGCCACATACCGCCCGGAAGCTCCGTCTTCGTGGACCACAGCTGTCAGCGGAACAGAGAGCTGCTCCAGCAGTGCGCCAAGGCAGAGATGATGAACACGTCGACGCGCTGGCTGGTGTGGAGCGCGCGGGA…	2119	MRPPALCLPAVLMAAVGCLLWWQPCSALLAQHATSLAVDYLTLRHARTVVTYTCSPYDSRRLSRLLLERLQAWLVLSPHPRHIPPGSSVFVDHSCQRNRELLQQCAKAEMMNTSTRWLVWSAREPDERLQVRLDSDVTWATWRGGGEGALLWGLSRPHPGWPLERWPVGAWAPAAGLRYDSWRLQRVAKKNLQGLALGAALPIVDTPLDRLGQRLRNVSDRQLDTMARFGWGLSNTLAALLNFSIILYRVPNFGSLVSENEMDGAVALIHNGTVEFGAAGFIMTTRRMDFMDYTGPGRLWAPEIMFRHPKSASVLTTIFRPYTAQLWVSSGALFLLILLVSRLFSWAEHRVTATVHPVDNSWNSTFLLVSSAIGQQGVSRSSEWLSWRVLLFVSFLCTN…	655	Complete ORF	ALA15333.1	ionotropic receptor 29 [Locusta migratoria]	0	89	3	NA	87	88	2.47	2.1	-0.207511	0.340365	0.540187	noDEG
OchiGluR8	Unigene10166_All	GATACAACAAGTGAACATGTACAAAACATAGTAAATTCATGGAAGAATTTTGAAGTTGAAGATATTGACATGCCTGATATTGAACCAGAACAGATTGAAGTTGAATCTGCTCTCATGTATGATGCTGTCCATCTGTTTGATGCTACAGTAAGAGATATGAGAGACCTCCAAATTGAGGATTCACCTTCGGGTTGTGATAATACGTGGGGACATGGCCATTCATTTATCAACCTGATGAGAGATAGATATAAGACACTTCGTGGACTAACAGGACCTGTACATTTTGATTATGAAGGTTTTCGAACAGATTTTATGCTACATTTAGTGGAGTTGACAGTTGATGGACTACAGAAGATTGGCACATGGAATTCAACCACTGGACTCACTTTAATACGAGAA…	1561	MPDIEPEQIEVESALMYDAVHLFDATVRDMRDLQIEDSPSGCDNTWGHGHSFINLMRDRYKTLRGLTGPVHFDYEGFRTDFMLHLVELTVDGLQKIGTWNSTTGLTLIREEVSTEVRQEESLQNRTLIVLTAISKPYGMRVDTSLTLKGNAMYEGFGIDLIHEISLMLGFNYTFVLQLDSKYGTLNKETKKWDGMVRELLDCNADLAITDLTITAERESAVDFTMPFMNLGIAILYKKPMKAAPKLFSFMDPFSNDVWIVMFAAYIGVSLMLFVMGRISPYEWTNPYPCIEEPETLENQFTLSNSLWFTIGSLMQQGTEIAPIAVSTRMVAGIWWFFTLIMVSSYTANLAAFLTVESMFQPIKNVKDLADQNTIKYGAKRGGSTLNFFRDSEDEIYRRM…	496	3' lost	ALD51352.1	ionotropic glutamate receptor 8 [Locusta migratoria]	0	95	2	M1-M3	57	14	2.28	0.47	-2.24953	4.28448e-09	7.15322e-08	Down
OchiGluR9	CL3456.Contig3_All	CAGCCGGCTCCGTCAGGCCCCGCCAGGCTTTCAGCTACCAATGAGAGAGTTGCAGTTCACAGGATACAGCAGCAGTCTTTGCTTTTTAGCGAAACGCGTCCGACTGGTTGCTTAAACACTTCAGAGCAGCAGGAAGCTACTACGGCTATCAACAGAAAGTTACTACGGACGCCCATAGCTCAATCAACTACGGACCTCCACGTCTTGCAGGCGGTTCTGGAGGCGTAGGGAGGGGGGCAGCAGCGCGGCGCCATCGCCATGCTGGTGGCGCTCCTTGCGCTGCTGCCGTTGGCGAGCGCGCTGCCGGAAGTCATCCGCATCGGCGGGCTGTTCCACCCGGCGGACGATCGCCAGGAGGTGGCCTTCCGGTACGCAGTGGACCGACTGAACGCCGACCGC…	3042	MLVALLALLPLASALPEVIRIGGLFHPADDRQEVAFRYAVDRLNADRSILPRSRLSAQIEKISPQDSFHASKRVCHLLRSGVAAIFGPQSGQTASHVQSICDTMEIPHLETRWDYRLRRESCLVNLYPHPTALSKAYVDLVRAWGWKSFTIIYENNEGLVRLQELLKAHGPSEFPIAVRQLGEGTDYRPLLKQIKNSAESHIVLDCSTSRIYDVLKQAQQIGMMSDYHSYLITSLDLHSVDLEEFKYGGTNITAFRLVDPDKPELKKVIRDWGYGSYGRKADMGPIRTETALMYDAVHLFAKALHDLDSSQRIDIKPLSCDAVDTWQHGYSLINYMKIVEMQGLTGVIKFDNQGFRSNFLLDIVELNKDGLKKIGTWNSTEGVNFTRTYGEVYTQIVES…	853	Complete ORF	ALD51346.1	ionotropic glutamate receptor 9, partial [Locusta migratoria]	0	96.01	3	S1 M1-M3	115	131	2.22	2.12	-0.0360659	0.844403	0.926084	noDEG
OchiGluR12	Unigene7889_All	CCTGCTACGTGCTCTCCGCTCGCACTTACAGCGCACTGAGCGGTCAGCTGGCTGCGCTACCTGCAGCACGACTACATGTGAGCCAACGACGACTGACGGATTTCATCAACTGGCAACTCCCCTGTCAGTTCTGAAAGGTGTTGGCGTCGCCGACATGGCTGGTGGCCGGCCCGGCCTCCGCCAGCGGCTGACCCTGGGACGGGGACTCGGTGCACAGCGCCTGCTGGCAGCCAGCTGGCTCGTCCTGCTGCTGCAGCTGCCGGCCGCGGCCGCCAGCAACAAGCCCATCTCCAGCGTCCGCATCGCCGGCATCTTCGAGGAGACGGACCCTCCAGAGCTGCAGTATGCCTTCCAGGCGGCGGTGGAGGCGGTGAACCGCCAGACGACGTCGGAGTACCC…	2972	MAGGRPGLRQRLTLGRGLGAQRLLAASWLVLLLQLPAAAASNKPISSVRIAGIFEETDPPELQYAFQAAVEAVNRQTTSEYPLGLSGHRPLIQEHVEVINGADSYGAKRQACSLVEQGLAGVVGPRQSASTDVVRSMCDRLEIPQIIVNWDPYPPPIASYQFNLHPHADFISQALVDVLYELKWRSYTVLFQNDESLVRLRGVLQEREPWDPPIAVRQLEEDGDNRPMLKEIKQAAESRLVLDCDTDQILPVLQQAADIKLAEVYQSYLLTSLDAHTLDFTQFRLSGTNITILRLIQPESAAVMKTMQDFDYALTKLPQTVTITAQTLRTETALMYDAVRVLAEALFKTSTMETVQTQSLNCSDESAVWDRGVSVREFIRDMRHRGISGDIHFDAEGRR…	929	Complete ORF	ALD51341.1	ionotropic glutamate receptor 12 [Locusta migratoria]	0	89	3	S1 M1-M3	167	18	3.29	0.3	-3.43778	7.15106e-36	4.93822e-34	Down
^ Protein domains predicted using InterPro protein sequence analysis & classification database as implemated in Geneious
 TMD − transmembrane domains
✚ S1 corresponds to Pfam domain PF10613; M1 to M3 corresponds to PF00060 Pram domain

## Sheet: Sheet 5-SNMP
Gene Name	Unigene ID	Transcript 5'-3'	Transcript length	Predicted protein sequence	Predicted protein length	Status	GenBank accession	NR_annotation	E value	Identities(%)	Predicted Domains^				MA_rawfragments	FA_rawfragments	MA_FPKM	FA_FPKM	log2Fold	pvalue	qvalue	Diff
											TMD (No.)	Pfam	Prints✪	Panther★
OchiSNMP1	CL4219.Contig3_All	CTGCTGCCTGCTACGTCAAATGACGTTACCATAGGGTCCTGTCACTCGTCCTCATGTATCGTCGCTGGTTCGGAGCTCCGCAGGGATCCATACTCGGACCTCCGTTCGTGTCGAGTGCGAAAATAAGGAGATAATTCTGAGCGGTATTGCCAAAAGACACTTCCACCGTTTTGCATCAGTTTACCGGCGACGTACATCAGTTATACATAGCAAGGAGTCACGATGCAGCTTCCCGTGGGTCTGGCGGCCGGAGGGGGCGGCGTCTTCTTCCTGGCGGTGGTCGCCGGCTGGTACGGGATGCCCAAGCTCATCTCCAGCCAGATATCCTCTGGACTGGCACTGAAGAAAGGATCGGACATCCGTCAGATGTGGGCCAACTTCTCCGACCCCATCGACTTC…	6239	MQLPVGLAAGGGGVFFLAVVAGWYGMPKLISSQISSGLALKKGSDIRQMWANFSDPIDFRVYMLNLTNPEAVHRGEKPVVQQVGPYFYEEYKQKVKLRDHKEDDTVSYNNKITWLFNQGKSAPGLTGDEIITMPHPLLLGMLLALERDKPGMLALVNKAIPPLFRKPESIFVTAPARNFLFDGIVINCTVTDFSAKALCTGLKKEAKELKREGDNFFFSFFGHKNGTVDAGRLRVKRGIQNIDDLGRVISFNGEPKMSSWRGDPCNDLRGTDSTIFPPFRDPKEPIIAFGADLCLSLGATWERKAEYMGVPGNRYTAEMPDMKGNPEHHCYCPTEQTCLEKGALDLSPCAGAPVIATLPHFYLASETYLRTVSGLHPTKEEHELFMVFESTTGSPMEAR…	514	Complete ORF	AMS24657.1	sensory neuron membrane protein 1 [Schistocerca gregaria]	0	94	2	PF01130	PR01609	PTHR11923	21083	38269	191.41	295.5	0.636097	0	0	noDEG
OchiSNMP2	CL5220.Contig2_All	CGCCAGTCGGCGCGCAGTGGCGGTGCTGTGCTGTGCTGTCGAGTCTGCTGAGTGCCTCTCGGAATGCTGTCGGCTGGAGTGTGCGGCTGCGGCCGGCGCGGCCTGCTCTGGGCTCTGGTGGCGGGCGCCGCCGTGCTGGCCCTGGCGCTCGCCCTGCGCTGGGCCGCCTTCCCGGCCATCCTCAACGCCAAGATCAGCCAGGCGGTGAAGCTGCAGGATGGGACGCCTGCCATGGAGCGCTTTGTCGAGATTCCACAGCCGCTGCTGTACAAGACGTACCTCTTCAACGTCACCAACCCGGACGAAATCAGTCAGGGTGGCAAGCCTGTTCTACAGCAGGTTGGACCCTACGTTTATGAGGAGAGGCGGCGCAGGCACGACGTGAGGCGGCAGTCGGAC…	4221	MLSAGVCGCGRRGLLWALVAGAAVLALALALRWAAFPAILNAKISQAVKLQDGTPAMERFVEIPQPLLYKTYLFNVTNPDEISQGGKPVLQQVGPYVYEERRRRHDVRRQSDGSLAYRLETSFYFSPERSPGLSEDDEFTYLNVVMLGVVVQVSEDYSSLLSMVEPVLRELLPGGSQLFRVATARQLLWSGVPTVDCRGNLSALAALACGALPPLLPPTVRQAEPGLYLFSFFGFKNGTSRQWWRVDSGERDVRALGSVLSYDNSSRLKTWSPSDSSCNEIRGTDSTLFPPFITPNDTLYVFAHDICRSMHVEYEREQEISGLKGLRFVASRDMLRRGGPNACTCAGGRCLPSGAMSVRECLKAPIAVSFPHFYQAAPEYLQYAEGLSPSKDHHETFVV…	545	Complete ORF	AMS24658.1	sensory neuron membrane protein 2 [Schistocerca gregaria]	0	81	2	PF01130	PR01609	PTHR11923	4939	7216	67.26	83.3	0.322981	1.4904e-34	9.83778e-33	noDEG
^ Protein domains predicted using InterPro protein sequence analysis & classification database
 Pfam − PF01130 (CD36)
✪ Prints − PR01609 (CD36 family)
★ PANTHER − PTHR11923 (scavenger receptor class B type-1 [CD36 antigen])
